# Supplementary material for: Systematic attribution of heatwaves to the emissions of carbon majors
Source: Research Square preprint supplement (doi:10.21203/rs.3.rs-4796598/v1), 2024-08-07
Supplement: Supplementary file 1 [file 42665ee0b90039aac53f8dfa.docx]

**Supplementary material for**

**Systematic attribution of historical heatwaves to the emissions of carbon majors**

Yann Quilcaille1, Lukas Gudmundsson1, Dominik Schumacher1, Thomas Gasser2, Richard Heede3, Corina Heri4, Quentin Lejeune5, Shruti Nath6, Wim Thiery7, Carl-Friedrich Schleussner2,8, Sonia I. Seneviratne1

1Institute for Atmospheric and Climate Science, Department of Environmental Systems Science, ETH Zurich, Zurich, Switzerland.

2International Institute for Applied Systems Analysis (IIASA), Laxenburg, Austria.

3Climate Accountability Institute, Snowmass, Colorado, USA

4University of Zurich, Zurich, Switzerland

5Climate Analytics, Berlin, Germany

6Atmospheric, Oceanic and Planetary Physics, Department of Physics, University of Oxford

7Vrije Universiteit Brussel, Department of Water and Climate, Brussels, Belgium.

8Integrative Research Institute on Transformations of Human-Environment Systems (IRI THESys) and the Geography Department, Humboldt-Universität zu Berlin, Berlin, Germany.

Spatial definition of events

The reported locations in the EM-DAT database may be names of cities, provinces, states or whole countries (e.g. France), but geographical boundaries are necessary. We employ an algorithm that matches the reported location in EM-DAT1 to spatial elements from GADM2.

1. The reported ISO code is used to pre-select the spatial elements of GADM, both of this country, but also from any attached disputed territories.
2. The reported location is prepared: replacing spatial characters (accents, numbers, punctuation); removing extra spaces; lowercases for all characters; synthetizing specific sentences (e.g. “Kadamjay district in Batken oblast” becoming “Kadamjay”); correcting for any change in regional aggregation (e.g. “Haute & Basse Normandie” becoming “Normandie”); translating any region without its variant in GADM (e.g. “Voreio Aigaio” becoming “North Aegean”).
3. Each preselected spatial element is compared to each element of the prepared reported location, by applying a character matcher (difflib, 2024) on its names and variants.
4. Each retained spatial element is filtered using a prepared list of false positives. For instance, the location for the state of “Ohio” triggers the identification of the county “Ohio” in the states of Kentucky and West Virginia, which have not been reported.
5. The list of spatial elements is compared to the initial reported location, checking whether it matches correctly. If not, the issue is implemented through the prepared lists of known issues in steps 2 and 4.

Temporal definition of the event

In the EM-DAT database, the dates for the heatwaves may be reported with the starting and ending days. When both days are provided, we use the average of the daily average temperature over this exact period. Other indicators may be possible3, but the average aggregates the essential features of these heatwaves4. The annual indicator is calculated first on each grid point, then averaged over the defined region to maximize the relevance of the indicator5,6.

Besides, some events were reported without the starting and/or ending day(s). We observe that heatwaves reporting both days and lasting less than a month last on average 8 days. Therefore, we use as an indicator for the events with missing days the maximum of the 8 days running average over the reported month. In the case that several months were reported with missing starting/ending days, we lengthen the duration of the running average by 1 month for each supplementary month reported.

Expressions for the conditional distributions

Extreme event attribution may use different distributions5, but also different expressions for its parameters7. Thus, we search using ERA5 data8 for the best trade-off for accuracy and simplicity.

We identify as best solution the Generalized Extreme Value (GEV) distributions with a linear evolution of its location as outlined in equation (1). The average temperature over the period and region of the event is written as , and thus follows a GEV distribution of location , scale and shape , while the location varies with the change in global mean temperature smoothed over the 3 former years (GMT).

The first step in the exploration was to test the four following distributions. For each heatwave, the performance of the conditional distribution is assessed through a quantile-quantile plot. For the reasons listed below, only the GEV is used for the results presented in this paper.

- GEV: this distribution is often used in attribution analysis 5, because it characterizes block-extrema, and we observe good performances 9.
- Gaussian: this distribution is sometimes used for attribution 5, although it is more adapted for averages over long periods. Though the quantile-quantile plots, we observe that it did not correctly reproduce the tails of the distribution, thus discarded this distribution.
- Skew normal: this distribution may have been appropriate, but we observe lower stability of the fits compared to the GEV. That is why we discarded this distribution to accelerate the training.
- General Pareto Distribution: this distribution is appropriate to describe exceedances over thresholds 5, and we observed poor performances in fitting the heatwaves.

The second step in this exploration was to test different expressions for the location, the scale, and the shape parameters, all using the GMT as covariate: constant, linear, quadratic, or polynomial function of the 2nd order. The Bayesian Information Criteria (BIC) was used to assess the configuration that maximizes performance while avoiding over-fitting. Heatwaves are often attributed using GEVs with linear evolution of the location. We test this expression by assessing the gain in performance through the negative log likelihood (NLL), both from a stationary distribution to the usual expression, and from a stationary distribution to the expression identified by the BIC. We observe that in most cases, the expression identified by the BIC differs from the usual expression (i.e. GEV with linear evolution of the location). However, over all considered heatwaves, 88% to 100% of the gain in NLL can be attributed to the usual expression, with an average of 98%. It means that the added complexity of the expressions marginally improves the fit according to the BIC. This result confirms that this expression can be used for most heatwaves.

Complementary information on the training of conditional distributions

Given the number of heatwaves and the variety of explored conditional distributions, the training algorithm required high flexibility and robustness. Although online resources are now available10, they are often limited by the robustness of the first guess. This technical aspect was addressed in MESMER-X11,12, for the training of conditional distributions of various climate indicators at the grid point level. The first guess is improved thanks to initial regressions to deduce approximate coefficients for the location and the scale, while the shape parameter is taken as the middle-range of the deduced support consistent with the sample11. All coefficients are then tuned with a minimization of the NLL, while testing each iteration for out-of-support points or non-physical parameters. This method is applied here, bounding the shape parameter between –0.4 and 0.45.

The choice of including or not the event when training the conditional distribution has been extensively discussed, although no final consensus was reached5,13,14. The results presented in this paper have been obtained by training with the event, to prevent removing points from the observational record. To ensure numerical convergence, a minimum probability of 10-9 was set for each point of the full sample. It implies that the attributed events under factual conditions will not have return periods higher than a billion years, which we consider long enough.

An additional technical aspect is implemented in this method. Over the past decades, climate change has accelerated. It implies that lower warming levels have more points in the training sample than higher warming levels. This bias in the density of the training sample may alter the performances of the conditional distributions. To compensate for this misrepresentation, we include a weighting of the NLL by the inverse of the density of the GMT.

Besides the observational datasets ERA5 and BEST, simulations are used from the following Earth System Models: ACCESS-CM2, ACCESS-ESM1-5, AWI-CM-1-1-MR, BCC-CSM2-MR, CESM2, CESM2-WACCM, CMCC-CM2-SR5, CMCC-ESM2, CanESM5, EC-Earth3, EC-Earth3-CC, EC-Earth3-Veg, EC-Earth3-Veg-LR, FGOALS-g3, GFDL-CM4, GFDL-ESM4, INM-CM4-8, INM-CM5-0, IPSL-CM6A-LR, KACE-1-0-G, KIOST-ESM, MIROC6, MPI-ESM1-2-HR, MPI-ESM1-2-LR, MRI-ESM2-0, NESM3, NorESM2-LM, NorESM2-MM, TaiESM1. For each heatwave, not all of these models may be used, only the most representative are kept as described in the next section.

Decomposition of the contributions of entities

We show here that the probability of a heatwave under a factual world can be decomposed into a sum of terms, each one being associated with the causes of the event. We show that this decomposition can be extended to the probability ratio.

We remind the notifications introduced in the manuscript. Assuming an event , we are interested in its properties under factual conditions , that is to say the factual climate, and counterfactual conditions , that is to say the unperturbed conditions. The probability of the event under factual conditions is then written as the conditional probability .

The causes of the event stem from different conditions: the unperturbed conditions , the activities of a number of entities, each individually written , and other anthropogenic effects written . Thus, we can write as a set composed as a union () of these effects:

For simplification of the future equations, we rewrite the equation (2) by introducing two entities that are the unperturbed conditions and the other anthropogenic effects.

We remind that Bayes’ theorem states that, with and two events, with the probability of non zero, the probability of given can be written using the probability of given :

The conditional probability of the event under the factual climate can then be rewritten using Bayes’ theorem:

The Inclusion-Exclusion principle states that, the probability of the union can be written using their individual probabilities and their intersection :

This principle can be generalized to the union of terms using the usual close form from equation (6). This equation represents the full decomposition of the union, thus with all possible intersections that this union has. These intersections are obtained through all possible combinations of the set , with possible cardinals .

Because the Inclusion-Exclusion principle applies as well to conditional probabilities, it may be applied to equation (4).

We note that intersections of cardinal correspond to the individual contributions, then split the sum into the sum of individual contributions and the intersections with :

We remind equation (2), to identify the terms corresponding to , and their intersection.

Re-applying Bayes’ theorem to each term of equation (9) leads to the equation (10):

Equation (10) proves that the probability of an event can be split as a sum of terms. The first one corresponds to the probability of the event under unperturbed conditions only. The second one entails both the effect of the other anthropogenic effects and their intersection with unperturbed conditions . Finally, a sum of terms is obtained, one for each entity, which gathers its individual contribution and its intersections with the other terms.

The probability ratio of the event is defined as the ratio of the probability under factual conditions and counterfactual conditions, thus as follows:

Given equations (10) and (11), we can write the probability ratio as the following sum of terms:

We remind that , and are potential causes for the events . It is important to note that the first term of equation (12) does not depend on the event. Thus, this expression can be applied to any event, keeping the same sets and as such. We hypothesize that an event exists that has not been influenced by the anthropogenic factors and , for instance anything occurring out of our galaxy. For this event, the probability ratio is equal to 1, because there is no perturbation of its probability by anthropogenic factors. Thus, all the terms and are zero. It implies that the first term is 1 as well, not only for this event, but for as well. Thus, equation (12) can be rewritten as a sum of the unity, for events unperturbed by anthropogenic causes, and terms representing the human perturbations.

Discussing an alternative to this decomposition

Alternatively to the approach based on GMT, a basic approach would be to assess the contributions directly with the emissions. The fraction in the cumulative emissions at the time of the event would represent the share of responsibility of the carbon major in the causes of the event. This fraction can be used for the change in intensity and the change in probability of the event. This approach may be compared to the principle applied for the attributional life cycle assessments, taking the Earth system as a whole and using the shares in its inputs to trace the perturbation15,16, while the approach based on GMT traces the effects of the carbon majors through the Earth system, thus is more similar to the principle of the consequential life cycle assessment. However, the approach based on cumulative emissions has several drawbacks.

First, carbon majors fuel climate change with CO2 and other compounds, such as CH4. As an approximation, it would still be possible to aggregate these compounds using a global warming potential for fossil CH4.

Then, the carbon cycle partially absorbs the emitted carbon emissions over time. Thus, two companies with the same cumulated emissions may not share the same responsibility if one has older emissions, thus with a lower contribution in the atmospheric concentration of CO2. Still, these old emissions still contributed to warming up the Earth system and saturating the carbon sinks.

Finally, the attribution analysis may not respond linearly to changes in GMT. For this particular study, heatwaves are represented with a GEV with the location varying linearly with GMT. According to the Transient Climate Response to Emissions (TCRE), the GMT varies almost linearly with cumulative emissions. Thus, the approach based on cumulative emissions would lead to similar results as ours. However, for events where the distributions does not vary linearly with GMT, as it may for extreme precipitations5,6, non-linearities would be introduced.

To conclude, the approach based on cumulative emissions is an approximation that relies on the linearity of the Earth system. However, this system is not entirely linear, and the TCRE is known as an approximation with its limits17. Under the assumptions that the linearity of the system would be respected, this simple approach would then lead to similar results as those based on the approach used in this work.

**References**

1 EM-DAT. *EM-DAT, CRED / UCLouvain*, <<www.emdat.be>> (2024).

2 GADM. *Global ADMinistrative area data version 4.1*, <<https://gadm.org/download_world.html>> (2022).

3 Russo, E. & Domeisen, D. I. V. Increasing Intensity of Extreme Heatwaves: The Crucial Role of Metrics. *Geophysical Research Letters* **50**, e2023GL103540 (2023). <https://doi.org/https://doi.org/10.1029/2023GL103540>

4 Xu, Z., Cheng, J., Hu, W. & Tong, S. Heatwave and health events: A systematic evaluation of different temperature indicators, heatwave intensities and durations. *Science of The Total Environment* **630**, 679-689 (2018). <https://doi.org/https://doi.org/10.1016/j.scitotenv.2018.02.268>

5 Philip, S. *et al.* A protocol for probabilistic extreme event attribution analyses. *Adv. Stat. Clim. Meteorol. Oceanogr.* **6**, 177-203 (2020). <https://doi.org/10.5194/ascmo-6-177-2020>

6 van Oldenborgh, G. J. *et al.* Pathways and pitfalls in extreme event attribution. *Climatic Change* **166**, 13 (2021). <https://doi.org/10.1007/s10584-021-03071-7>

7 Robin, Y. & Ribes, A. Nonstationary extreme value analysis for event attribution combining climate models and observations. *Adv. Stat. Clim. Meteorol. Oceanogr.* **6**, 205-221 (2020). <https://doi.org/10.5194/ascmo-6-205-2020>

8 Hersbach, H. *et al.* The ERA5 global reanalysis. *Quarterly Journal of the Royal Meteorological Society* **146**, 1999-2049 (2020). <https://doi.org/https://doi.org/10.1002/qj.3803>

9 Coles, S. *An introduction to statistical modeling of extreme values*. (Springer, 2001).

10 Miralles, O. *pykelihood version 0.4.1*, <<https://github.com/OpheliaMiralles/pykelihood/releases/tag/v0.4.1>> (2023).

11 Quilcaille, Y., Gudmundsson, L., Beusch, L., Hauser, M. & Seneviratne, S. I. Showcasing MESMER-X: Spatially Resolved Emulation of Annual Maximum Temperatures of Earth System Models. *Geophysical Research Letters* **49**, e2022GL099012 (2022). <https://doi.org/https://doi.org/10.1029/2022GL099012>

12 Quilcaille, Y., Gudmundsson, L. & Seneviratne, S. I. Extending MESMER-X: a spatially resolved Earth system model emulator for fire weather and soil moisture. *Earth Syst. Dynam.* **14**, 1333-1362 (2023). <https://doi.org/10.5194/esd-14-1333-2023>

13 Philip, S. Y. *et al.* Rapid attribution analysis of the extraordinary heat wave on the Pacific coast of the US and Canada in June 2021. *Earth Syst. Dynam.* **13**, 1689-1713 (2022). <https://doi.org/10.5194/esd-13-1689-2022>

14 Miralles, O. & Davison, A. C. Timing and spatial selection bias in rapid extreme event attribution. *Weather and Climate Extremes* **41**, 100584 (2023). <https://doi.org/https://doi.org/10.1016/j.wace.2023.100584>

15 Weidema, B. P., Pizzol, M., Schmidt, J. & Thoma, G. Attributional or consequential Life Cycle Assessment: A matter of social responsibility. *Journal of Cleaner Production* **174**, 305-314 (2018). <https://doi.org/https://doi.org/10.1016/j.jclepro.2017.10.340>

16 Brander, M., Burritt, R. L. & Christ, K. L. Coupling attributional and consequential life cycle assessment: A matter of social responsibility. *Journal of Cleaner Production* **215**, 514-521 (2019). <https://doi.org/https://doi.org/10.1016/j.jclepro.2019.01.066>

17 MacDougall, A. H. & Friedlingstein, P. The Origin and Limits of the Near Proportionality between Climate Warming and Cumulative CO2 Emissions. *Journal of Climate* **28**, 4217-4230 (2015). <https://doi.org/https://doi.org/10.1175/JCLI-D-14-00036.1>
