# Supplementary material for: Systematic attribution of heatwaves to the emissions of carbon majors
Source: Research Square preprint supplement (doi:10.21203/rs.3.rs-4796598/v1), 2024-08-07
Supplement: Supplementary file 2 [file d77a77736a22e9a8129f5fac.xlsx]

## Sheet: Sheet
Supplementary table for the scientific publication: Systematic attribution of historical heatwaves to the emissions of carbon majors
Authors: Yann Quilcaille, Lukas Gudmundsson, Dominik Schumacher, Thomas Gasser, Rick Heede, Quentin Lejeune, Shruti Nath, Wim Thiery, Carl-Friedrich Schleussner, Sonia I. Seneviratne
Contact: Yann Quilcaille (yann.quilcaille@env.ethz.ch)
Description: For each one of the 187 heatwaves reported to the disaster database EM-DAT over 2000-2022, an extreme event attribution is performed, to obtain how much anthropogenic climate change has changed the intensity ('Change in intensity') and multiplied the probability ('Probability Ratio') of the heatwave with reference to preindustrial levels. Each extreme event attribution is extended to…
Definition: Extreme Event Attribution: Field of study in climate science that uses physics and statistics to assess the influence of anthropogenic climate change on extreme events, such as heatwaves. More details can be found here: https://www.worldweatherattribution.org/ & https://doi.org/10.5194/ascmo-6-177-2020
Definition: Carbon Major: Businesses who directly profit from fossil fuel production or other high emitting activities. These entities may be investor-owned, state-owned or nation-states producers. More details can be found here: https://doi.org/10.1007/s10584-013-0986-y
Disclaimer: The results provided in this table and in the scientific publication are to be considered as scientific information, and not as the quantification of legal responsibilities of actors. This work was driven by two objectives: systematizing extreme event attribution to more events, and extending the attribution to the emitters. The carbon majors were chosen as a category of emitters, bec…
Region of disaster				East Asia and Pacific
Country of disaster				Australia						China								Japan
Disaster number in EM-DAT				2009-0616-AUS		2014-0010-AUS		2018-0459-AUS		2002-0531-CHN		2004-0310-CHN		2005-0339-CHN		2013-0582-CHN		2004-0352-JPN		2007-0358-JPN		2008-0662-JPN		2009-0658-JPN		2010-0331-JPN		2011-0573-JPN		2013-0316-JPN		2014-0578-JPN		2015-0575-JPN		2015-0610-JPN		2015-0611-JPN		2016-0538-JPN		2018-0226-JPN		2019-0463-JPN		2019-0467-JPN		2022-0423-JPN
Reported location				Victoria, New South wales (South), Tasmania (Northern) provinces		Western Australia, Victoria provinces				Chongqing Shi province, Shijiazhuang district (Hebei Sheng province)		Guangzhou city (Guangzhou district, Guangdong Sheng province)		Shanghai city (Shanghai Shi province)		Shanghai Shi province		Tokyo city (Tookyoo province)		Aiti, Ehime, Gifu, Gunma, Hirosima, Hukui, Hukuoka, Hukusima, Hyoogo, Ibaraki, Isikawa, Kagawa, Kagosima, Kanagawa, Kooti, Kumamoto, Kyooto, Mie, Miyagi, Miyazaki, Nagano, Nagasaki, Nara, Niigata, Okayama, Okinawa, Ooita, Oosaka, Saga, Saitama, Siga, Simane, Sizuoka, Tiba, Tokusima, Tookyoo, Totigi, Tottori, Toyama, Wakayama, Yamagata, Yamaguti, Yamanasi provinces		All country		All country		Aiti, Ehime, Gifu, Gunma, Hirosima, Hukui, Hukuoka, Hukusima, Hyoogo, Ibaraki, Isikawa, Kagawa, Kagosima, Kanagawa, Kooti, Kumamoto, Kyooto, Mie, Miyagi, Miyazaki, Nagano, Nagasaki, Nara, Niigata, Okayama, Okinawa, Ooita, Oosaka, Saga, Saitama, Siga, Simane, Sizuoka, Tiba, Tokusima, Tookyoo, Totigi, Tottori, Toyama, Wakayama, Yamagata, Yamaguti, Yamanasi provinces		Aiti, Ehime, Gifu, Gunma, Hirosima, Hukui, Hukuoka, Hukusima, Hyoogo, Ibaraki, Isikawa, Kagawa, Kagosima, Kanagawa, Kooti, Kumamoto, Kyooto, Mie, Miyagi, Miyazaki, Nagano, Nagasaki, Nara, Niigata, Okayama, Okinawa, Ooita, Oosaka, Saga, Saitama, Siga, Simane, Sizuoka, Tiba, Tokusima, Tookyoo, Totigi, Tottori, Toyama, Wakayama, Yamagata, Yamaguti, Yamanasi provinces		Ehime, Kagawa, Kooti, Tokusima provinces (Shikoko Isl.), Hukuoka, Kagosima, Kumamoto, Miyazaki, Nagasaki, Ooita, Saga provinces (Kyushu Isl.), Oosaka, Kyooto provinces (Honshu Isl.), Kobe city (Hyoogo province) (Honshu Isl.)		Aiti, Ehime, Gifu, Gunma, Hirosima, Hukui, Hukuoka, Hukusima, Hyoogo, Ibaraki, Isikawa, Kagawa, Kagosima, Kanagawa, Kooti, Kumamoto, Kyooto, Mie, Miyagi, Miyazaki, Nagano, Nagasaki, Nara, Niigata, Okayama, Okinawa, Ooita, Oosaka, Saga, Saitama, Siga, Simane, Sizuoka, Tiba, Tokusima, Tookyoo, Totigi, Tottori, Toyama, Wakayama, Yamagata, Yamaguti, Yamanasi provinces		Oosaka province, Tokyo, Saitama		Entire country		Funabashi (Chiba Prefecture), Isesaki City, Tatebayashi (Gunma Prefecture), Tokyo, Iwate, Yagamata		Yamanashi, Kawanehoncho,Shizuoka		Kumagaya (Saitama Prefecture)						Gunma, Tochigi, Yamanashi, Aichi, Tokyo
Reported period				2009.01.27 - 2009.02.08		2014.01.13 - 2014.01.18		2018.12 - 2019.01		2002.07 - 2002.07		2004.07.02 - 2004.07.03		2005.07 - 2005.07		2013.07.01 - 2013.08.15		2004.07 - 2004.08		2007.08 - 2007.08.17		2008.07 - 2008.07		2009.07 - 2009.07		2010.07.19 - 2010.07.25		2011.07 - 2011.08		2013.05 - 2013.09		2014.07.14 - 2014.07.29		2015.08.03 - 2015.08.09		2015.05.11 - 2015.05		2015.07.12 - 2015.07.15		2016.08.06 - 2016.08.08		2018.07.01 - 2018.07.15		2019.07.29 - 2019.08.08		2019.07.22 - 2019.07.30		2022.06.20 - 2022.07.01
Best estimate & confidence interval				median	CI 95.0%	median	CI 95.0%	median	CI 95.0%	median	CI 95.0%	median	CI 95.0%	median	CI 95.0%	median	CI 95.0%	median	CI 95.0%	median	CI 95.0%	median	CI 95.0%	median	CI 95.0%	median	CI 95.0%	median	CI 95.0%	median	CI 95.0%	median	CI 95.0%	median	CI 95.0%	median	CI 95.0%	median	CI 95.0%	median	CI 95.0%	median	CI 95.0%	median	CI 95.0%	median	CI 95.0%	median	CI 95.0%
Anthropogenic climate change			Change in intensity (°C)	0.7463 °C	-0.0133 °C - 1.7186 °C	0.7232 °C	-0.1526 °C - 1.5125 °C	1.2781 °C	0.6627 °C - 1.9384 °C	0.8808 °C	0.3467 °C - 1.3486 °C	0.7587 °C	0.3182 °C - 1.4598 °C	1.2299 °C	0.6399 °C - 1.7809 °C	1.1451 °C	0.5711 °C - 1.7719 °C	1.0006 °C	0.5147 °C - 1.4966 °C	1.1887 °C	0.7439 °C - 1.7653 °C	1.0485 °C	0.45 °C - 1.5025 °C	1.0455 °C	0.4278 °C - 1.5245 °C	1.2609 °C	0.4262 °C - 1.9035 °C	1.1146 °C	0.6025 °C - 1.6864 °C	1.0969 °C	0.434 °C - 1.708 °C	1.2126 °C	0.5048 °C - 1.8781 °C	1.5077 °C	0.9753 °C - 2.3088 °C	1.6368 °C	1.0485 °C - 2.2717 °C	1.643 °C	0.5252 °C - 2.8876 °C	1.508 °C	0.9424 °C - 2.1474 °C	1.8671 °C	0.9219 °C - 3.2629 °C	1.6531 °C	1.033 °C - 2.5652 °C	1.1638 °C	0.4169 °C - 2.1724 °C	1.9242 °C	1.1541 °C - 3.1903 °C
			Probability Ratio (-)	16.4	1.15 - >10'000	6.42	1.4 - 232.24	>10'000	>10'000 - >10'000	41.48	2.75 - >10'000	5377.23	2.24 - >10'000	31.42	3.5 - >10'000	>10'000	16.83 - >10'000	40.14	4.06 - >10'000	3614.57	12.72 - >10'000	4.01	1.6 - 15.99	1.43	1.1 - 1.89	>10'000	5.32 - >10'000	9.32	2.24 - 495.34	>10'000	85.34 - >10'000	5.51	2.23 - 90.51	>10'000	11.0 - >10'000	>10'000	156.25 - >10'000	>10'000	4.73 - >10'000	705.51	7.29 - >10'000	406.96	4.75 - >10'000	>10'000	515.75 - >10'000	81.4	4.97 - >10'000	>10'000	244.85 - >10'000
Region of headquarter	Country of headquarter	Carbon major
East Asia and Pacific	Australia	BHP	Contribution to intensity (°C)	0.0033 °C	0.0001 °C - 0.0068 °C	0.0033 °C	-0.0006 °C - 0.007 °C	0.006 °C	0.0035 °C - 0.0082 °C	0.0031 °C	0.0018 °C - 0.0042 °C	0.0026 °C	0.0011 °C - 0.0046 °C	0.0041 °C	0.0026 °C - 0.0055 °C	0.005 °C	0.0026 °C - 0.0072 °C	0.0033 °C	0.0024 °C - 0.0043 °C	0.0045 °C	0.0033 °C - 0.006 °C	0.004 °C	0.0022 °C - 0.0056 °C	0.0042 °C	0.0022 °C - 0.006 °C	0.0053 °C	0.0024 °C - 0.0074 °C	0.0051 °C	0.0033 °C - 0.0067 °C	0.0052 °C	0.0023 °C - 0.0069 °C	0.0055 °C	0.0025 °C - 0.0079 °C	0.0071 °C	0.005 °C - 0.01 °C	0.0075 °C	0.0048 °C - 0.0098 °C	0.0077 °C	0.0023 °C - 0.0125 °C	0.0069 °C	0.0044 °C - 0.0096 °C	0.0084 °C	0.0046 °C - 0.0128 °C	0.0072 °C	0.005 °C - 0.0099 °C	0.005 °C	0.0017 °C - 0.008 °C	0.009 °C	0.0054 °C - 0.0126 °C
			Multiplication of preindustrial probability (-)	1.11	1.0 - >10'000	1.03	1.0 - 2.52	>10'000	>10'000 - >10'000	1.19	1.01 - >10'000	30.71	1.01 - >10'000	1.16	1.01 - >10'000	>10'000	1.12 - >10'000	1.19	1.01 - >10'000	23.84	1.06 - >10'000	1.01	1.0 - 1.06	1.0	1.0 - 1.0	>10'000	1.03 - >10'000	1.04	1.01 - 3.26	>10'000	1.84 - >10'000	1.02	1.01 - 1.39	2144.2	1.06 - >10'000	>10'000	2.38 - >10'000	>10'000	1.03 - >10'000	5.85	1.04 - >10'000	4.0	1.03 - >10'000	>10'000	5.96 - >10'000	1.5	1.02 - >10'000	>10'000	3.29 - >10'000
		Santos	Contribution to intensity (°C)	0.0002 °C	0.0 °C - 0.0004 °C	0.0002 °C	-0.0 °C - 0.0005 °C	0.0004 °C	0.0003 °C - 0.0006 °C	0.0002 °C	0.0001 °C - 0.0002 °C	0.0002 °C	0.0001 °C - 0.0003 °C	0.0002 °C	0.0002 °C - 0.0003 °C	0.0003 °C	0.0002 °C - 0.0005 °C	0.0002 °C	0.0001 °C - 0.0003 °C	0.0003 °C	0.0002 °C - 0.0004 °C	0.0003 °C	0.0001 °C - 0.0004 °C	0.0003 °C	0.0001 °C - 0.0004 °C	0.0003 °C	0.0002 °C - 0.0005 °C	0.0003 °C	0.0002 °C - 0.0004 °C	0.0003 °C	0.0002 °C - 0.0005 °C	0.0004 °C	0.0002 °C - 0.0005 °C	0.0005 °C	0.0003 °C - 0.0007 °C	0.0005 °C	0.0003 °C - 0.0007 °C	0.0005 °C	0.0002 °C - 0.0008 °C	0.0005 °C	0.0003 °C - 0.0007 °C	0.0006 °C	0.0003 °C - 0.0009 °C	0.0005 °C	0.0004 °C - 0.0007 °C	0.0004 °C	0.0001 °C - 0.0006 °C	0.0007 °C	0.0004 °C - 0.001 °C
			Multiplication of preindustrial probability (-)	1.01	1.0 - >10'000	1.0	1.0 - 1.1	>10'000	1119.14 - >10'000	1.01	1.0 - >10'000	2.74	1.0 - >10'000	1.01	1.0 - >10'000	>10'000	1.01 - >10'000	1.01	1.0 - >10'000	2.43	1.0 - >10'000	1.0	1.0 - 1.0	1.0	1.0 - 1.0	>10'000	1.0 - >10'000	1.0	1.0 - 1.15	>10'000	1.06 - >10'000	1.0	1.0 - 1.03	146.43	1.0 - >10'000	>10'000	1.09 - >10'000	>10'000	1.0 - >10'000	1.33	1.0 - >10'000	1.22	1.0 - >10'000	>10'000	1.37 - >10'000	1.04	1.0 - >10'000	>10'000	1.19 - >10'000
		Whitehaven Coal	Contribution to intensity (°C)	0.0 °C	0.0 °C - 0.0 °C	0.0 °C	-0.0 °C - 0.0001 °C	0.0001 °C	0.0001 °C - 0.0002 °C	0.0 °C	0.0 °C - 0.0 °C	0.0 °C	0.0 °C - 0.0 °C	0.0 °C	0.0 °C - 0.0 °C	0.0 °C	0.0 °C - 0.0 °C	0.0 °C	0.0 °C - 0.0 °C	0.0 °C	0.0 °C - 0.0 °C	0.0 °C	0.0 °C - 0.0 °C	0.0 °C	0.0 °C - 0.0 °C	0.0 °C	0.0 °C - 0.0 °C	0.0 °C	0.0 °C - 0.0 °C	0.0 °C	0.0 °C - 0.0 °C	0.0 °C	0.0 °C - 0.0001 °C	0.0001 °C	0.0001 °C - 0.0001 °C	0.0001 °C	0.0 °C - 0.0001 °C	0.0001 °C	0.0 °C - 0.0001 °C	0.0001 °C	0.0001 °C - 0.0001 °C	0.0002 °C	0.0001 °C - 0.0003 °C	0.0002 °C	0.0001 °C - 0.0002 °C	0.0001 °C	0.0 °C - 0.0002 °C	0.0003 °C	0.0002 °C - 0.0005 °C
			Multiplication of preindustrial probability (-)	1.0	1.0 - >10'000	1.0	1.0 - 1.01	>10'000	313.18 - >10'000	1.0	1.0 - 1.0	1.0	1.0 - 1.0	1.0	1.0 - 1.0	>10'000	1.0 - >10'000	1.0	1.0 - 1.0	1.01	1.0 - >10'000	1.0	1.0 - 1.0	1.0	1.0 - 1.0	>10'000	1.0 - >10'000	1.0	1.0 - 1.01	>10'000	1.01 - >10'000	1.0	1.0 - 1.0	22.71	1.0 - >10'000	>10'000	1.01 - >10'000	>10'000	1.0 - >10'000	1.06	1.0 - >10'000	1.06	1.0 - >10'000	>10'000	1.12 - >10'000	1.01	1.0 - >10'000	>10'000	1.09 - >10'000
		Woodside Energy	Contribution to intensity (°C)	0.0002 °C	0.0 °C - 0.0004 °C	0.0002 °C	-0.0 °C - 0.0005 °C	0.0005 °C	0.0003 °C - 0.0007 °C	0.0002 °C	0.0001 °C - 0.0002 °C	0.0001 °C	0.0001 °C - 0.0003 °C	0.0002 °C	0.0002 °C - 0.0003 °C	0.0003 °C	0.0002 °C - 0.0005 °C	0.0002 °C	0.0001 °C - 0.0002 °C	0.0003 °C	0.0002 °C - 0.0004 °C	0.0002 °C	0.0001 °C - 0.0003 °C	0.0003 °C	0.0001 °C - 0.0004 °C	0.0003 °C	0.0002 °C - 0.0005 °C	0.0003 °C	0.0002 °C - 0.0004 °C	0.0004 °C	0.0002 °C - 0.0005 °C	0.0004 °C	0.0002 °C - 0.0006 °C	0.0005 °C	0.0004 °C - 0.0007 °C	0.0005 °C	0.0003 °C - 0.0007 °C	0.0006 °C	0.0002 °C - 0.0009 °C	0.0005 °C	0.0003 °C - 0.0007 °C	0.0007 °C	0.0004 °C - 0.001 °C	0.0006 °C	0.0004 °C - 0.0008 °C	0.0004 °C	0.0001 °C - 0.0007 °C	0.0008 °C	0.0005 °C - 0.0011 °C
			Multiplication of preindustrial probability (-)	1.01	1.0 - >10'000	1.0	1.0 - 1.11	>10'000	1233.97 - >10'000	1.01	1.0 - >10'000	2.68	1.0 - >10'000	1.01	1.0 - >10'000	>10'000	1.01 - >10'000	1.01	1.0 - >10'000	2.38	1.0 - >10'000	1.0	1.0 - 1.0	1.0	1.0 - 1.0	>10'000	1.0 - >10'000	1.0	1.0 - 1.15	>10'000	1.06 - >10'000	1.0	1.0 - 1.03	157.17	1.0 - >10'000	>10'000	1.1 - >10'000	>10'000	1.0 - >10'000	1.36	1.0 - >10'000	1.24	1.0 - >10'000	>10'000	1.41 - >10'000	1.04	1.0 - >10'000	>10'000	1.21 - >10'000
	China	CNOOC	Contribution to intensity (°C)	0.0007 °C	0.0 °C - 0.0015 °C	0.0009 °C	-0.0002 °C - 0.0018 °C	0.0018 °C	0.0011 °C - 0.0025 °C	0.0005 °C	0.0003 °C - 0.0008 °C	0.0005 °C	0.0002 °C - 0.0009 °C	0.0008 °C	0.0005 °C - 0.0011 °C	0.0013 °C	0.0007 °C - 0.0018 °C	0.0006 °C	0.0005 °C - 0.0008 °C	0.001 °C	0.0007 °C - 0.0013 °C	0.0009 °C	0.0005 °C - 0.0012 °C	0.0009 °C	0.0005 °C - 0.0013 °C	0.0012 °C	0.0006 °C - 0.0017 °C	0.0012 °C	0.0008 °C - 0.0016 °C	0.0013 °C	0.0006 °C - 0.0018 °C	0.0014 °C	0.0006 °C - 0.0021 °C	0.002 °C	0.0014 °C - 0.0027 °C	0.002 °C	0.0013 °C - 0.0027 °C	0.0021 °C	0.0006 °C - 0.0034 °C	0.002 °C	0.0013 °C - 0.0027 °C	0.0026 °C	0.0014 °C - 0.0039 °C	0.0023 °C	0.0016 °C - 0.0031 °C	0.0016 °C	0.0005 °C - 0.0025 °C	0.0032 °C	0.0019 °C - 0.0045 °C
			Multiplication of preindustrial probability (-)	1.02	1.0 - >10'000	1.01	1.0 - 1.4	>10'000	4731.31 - >10'000	1.03	1.0 - >10'000	6.7	1.0 - >10'000	1.03	1.0 - >10'000	>10'000	1.03 - >10'000	1.04	1.0 - >10'000	5.83	1.01 - >10'000	1.0	1.0 - 1.01	1.0	1.0 - 1.0	>10'000	1.01 - >10'000	1.01	1.0 - 1.53	>10'000	1.22 - >10'000	1.01	1.0 - 1.1	587.3	1.02 - >10'000	>10'000	1.38 - >10'000	>10'000	1.01 - >10'000	2.38	1.01 - >10'000	1.92	1.01 - >10'000	>10'000	2.58 - >10'000	1.16	1.01 - >10'000	>10'000	1.82 - >10'000
		CNPC	Contribution to intensity (°C)	0.0045 °C	0.0002 °C - 0.0092 °C	0.0047 °C	-0.0009 °C - 0.0099 °C	0.0094 °C	0.0055 °C - 0.0128 °C	0.0044 °C	0.0026 °C - 0.0061 °C	0.0036 °C	0.0015 °C - 0.0064 °C	0.0056 °C	0.0036 °C - 0.0076 °C	0.0071 °C	0.0037 °C - 0.0102 °C	0.0047 °C	0.0033 °C - 0.0061 °C	0.0061 °C	0.0045 °C - 0.0082 °C	0.0055 °C	0.003 °C - 0.0076 °C	0.0058 °C	0.003 °C - 0.0081 °C	0.0072 °C	0.0033 °C - 0.0101 °C	0.007 °C	0.0046 °C - 0.0093 °C	0.0073 °C	0.0032 °C - 0.0098 °C	0.0078 °C	0.0035 °C - 0.0112 °C	0.0103 °C	0.0072 °C - 0.0145 °C	0.0108 °C	0.0069 °C - 0.0142 °C	0.0112 °C	0.0033 °C - 0.0181 °C	0.0101 °C	0.0065 °C - 0.0142 °C	0.0131 °C	0.0072 °C - 0.0199 °C	0.0115 °C	0.008 °C - 0.0158 °C	0.008 °C	0.0027 °C - 0.0127 °C	0.0153 °C	0.0092 °C - 0.0215 °C
			Multiplication of preindustrial probability (-)	1.15	1.0 - >10'000	1.05	1.0 - 3.16	>10'000	>10'000 - >10'000	1.27	1.01 - >10'000	42.61	1.01 - >10'000	1.22	1.02 - >10'000	>10'000	1.16 - >10'000	1.26	1.02 - >10'000	31.99	1.09 - >10'000	1.02	1.0 - 1.08	1.0	1.0 - 1.0	>10'000	1.04 - >10'000	1.06	1.01 - 4.13	>10'000	2.19 - >10'000	1.03	1.01 - 1.56	3098.17	1.09 - >10'000	>10'000	2.99 - >10'000	>10'000	1.04 - >10'000	8.15	1.06 - >10'000	5.66	1.04 - >10'000	>10'000	8.89 - >10'000	1.79	1.04 - >10'000	>10'000	4.91 - >10'000
		China (Cement)	Contribution to intensity (°C)	0.0028 °C	0.0001 °C - 0.0057 °C	0.0037 °C	-0.0007 °C - 0.008 °C	0.0086 °C	0.005 °C - 0.0118 °C	0.0021 °C	0.0012 °C - 0.0029 °C	0.0018 °C	0.0008 °C - 0.0032 °C	0.0029 °C	0.0019 °C - 0.0039 °C	0.0054 °C	0.0028 °C - 0.0077 °C	0.0023 °C	0.0017 °C - 0.003 °C	0.0035 °C	0.0026 °C - 0.0047 °C	0.0033 °C	0.0018 °C - 0.0045 °C	0.0036 °C	0.0019 °C - 0.0051 °C	0.0047 °C	0.0022 °C - 0.0066 °C	0.0048 °C	0.0032 °C - 0.0064 °C	0.0056 °C	0.0025 °C - 0.0075 °C	0.0063 °C	0.0028 °C - 0.009 °C	0.0087 °C	0.0061 °C - 0.0122 °C	0.0091 °C	0.0058 °C - 0.0119 °C	0.0094 °C	0.0028 °C - 0.0152 °C	0.0089 °C	0.0057 °C - 0.0124 °C	0.012 °C	0.0066 °C - 0.0184 °C	0.0108 °C	0.0075 °C - 0.0148 °C	0.0075 °C	0.0026 °C - 0.012 °C	0.0153 °C	0.0092 °C - 0.0215 °C
			Multiplication of preindustrial probability (-)	1.09	1.0 - >10'000	1.04	1.0 - 2.74	>10'000	>10'000 - >10'000	1.13	1.01 - >10'000	21.88	1.0 - >10'000	1.11	1.01 - >10'000	>10'000	1.13 - >10'000	1.13	1.01 - >10'000	18.68	1.05 - >10'000	1.01	1.0 - 1.05	1.0	1.0 - 1.0	>10'000	1.03 - >10'000	1.04	1.01 - 3.14	>10'000	1.91 - >10'000	1.03	1.01 - 1.45	2609.63	1.08 - >10'000	>10'000	2.68 - >10'000	>10'000	1.03 - >10'000	7.25	1.05 - >10'000	5.29	1.04 - >10'000	>10'000	8.43 - >10'000	1.74	1.03 - >10'000	>10'000	4.91 - >10'000
		China (Coal)	Contribution to intensity (°C)	0.0596 °C	0.0021 °C - 0.1225 °C	0.0659 °C	-0.0123 °C - 0.1407 °C	0.1331 °C	0.0775 °C - 0.1817 °C	0.0619 °C	0.0362 °C - 0.0846 °C	0.0484 °C	0.02 °C - 0.0861 °C	0.0747 °C	0.0479 °C - 0.1001 °C	0.0988 °C	0.0515 °C - 0.1413 °C	0.0622 °C	0.0442 °C - 0.0811 °C	0.0809 °C	0.0593 °C - 0.1078 °C	0.0723 °C	0.0394 °C - 0.1006 °C	0.0765 °C	0.0398 °C - 0.1077 °C	0.0968 °C	0.0444 °C - 0.1352 °C	0.0944 °C	0.0623 °C - 0.1256 °C	0.1018 °C	0.045 °C - 0.1364 °C	0.1102 °C	0.0495 °C - 0.1584 °C	0.1476 °C	0.1029 °C - 0.2069 °C	0.1547 °C	0.0987 °C - 0.2027 °C	0.1594 °C	0.0474 °C - 0.2581 °C	0.1455 °C	0.0936 °C - 0.2038 °C	0.1854 °C	0.102 °C - 0.2832 °C	0.163 °C	0.1131 °C - 0.2231 °C	0.1127 °C	0.0387 °C - 0.1803 °C	0.2176 °C	0.1302 °C - 0.3054 °C
			Multiplication of preindustrial probability (-)	2.93	1.05 - >10'000	1.67	1.07 - 31.51	>10'000	>10'000 - >10'000	4.77	1.17 - >10'000	553.79	1.1 - >10'000	3.88	1.23 - >10'000	>10'000	3.21 - >10'000	4.5	1.27 - >10'000	410.2	2.13 - >10'000	1.23	1.06 - 2.02	1.02	1.01 - 1.04	>10'000	1.58 - >10'000	1.85	1.15 - 44.24	>10'000	16.19 - >10'000	1.49	1.13 - 9.06	>10'000	2.3 - >10'000	>10'000	27.87 - >10'000	>10'000	1.52 - >10'000	104.54	1.8 - >10'000	66.59	1.55 - >10'000	>10'000	104.11 - >10'000	12.28	1.5 - >10'000	>10'000	52.35 - >10'000
		Sinopec	Contribution to intensity (°C)	0.0006 °C	0.0 °C - 0.0012 °C	0.0008 °C	-0.0002 °C - 0.0018 °C	0.0021 °C	0.0012 °C - 0.0029 °C	0.0002 °C	0.0001 °C - 0.0003 °C	0.0003 °C	0.0001 °C - 0.0005 °C	0.0005 °C	0.0003 °C - 0.0006 °C	0.0012 °C	0.0006 °C - 0.0017 °C	0.0003 °C	0.0002 °C - 0.0004 °C	0.0007 °C	0.0005 °C - 0.0009 °C	0.0007 °C	0.0004 °C - 0.0009 °C	0.0008 °C	0.0004 °C - 0.0011 °C	0.001 °C	0.0005 °C - 0.0014 °C	0.001 °C	0.0007 °C - 0.0014 °C	0.0012 °C	0.0005 °C - 0.0017 °C	0.0014 °C	0.0006 °C - 0.002 °C	0.002 °C	0.0014 °C - 0.0028 °C	0.0021 °C	0.0013 °C - 0.0028 °C	0.0022 °C	0.0006 °C - 0.0035 °C	0.0021 °C	0.0014 °C - 0.003 °C	0.0029 °C	0.0016 °C - 0.0045 °C	0.0027 °C	0.0018 °C - 0.0036 °C	0.0018 °C	0.0006 °C - 0.0029 °C	0.0037 °C	0.0022 °C - 0.0052 °C
			Multiplication of preindustrial probability (-)	1.02	1.0 - >10'000	1.01	1.0 - 1.39	>10'000	5415.15 - >10'000	1.01	1.0 - >10'000	3.99	1.0 - >10'000	1.02	1.0 - >10'000	>10'000	1.03 - >10'000	1.02	1.0 - >10'000	4.44	1.01 - >10'000	1.0	1.0 - 1.01	1.0	1.0 - 1.0	>10'000	1.01 - >10'000	1.01	1.0 - 1.47	>10'000	1.2 - >10'000	1.01	1.0 - 1.1	605.31	1.02 - >10'000	>10'000	1.39 - >10'000	>10'000	1.01 - >10'000	2.49	1.01 - >10'000	2.05	1.01 - >10'000	>10'000	2.83 - >10'000	1.18	1.01 - >10'000	>10'000	1.95 - >10'000
	Indonesia	Adaro Energy	Contribution to intensity (°C)	0.0003 °C	0.0 °C - 0.0006 °C	0.0004 °C	-0.0001 °C - 0.0009 °C	0.001 °C	0.0006 °C - 0.0013 °C	0.0001 °C	0.0001 °C - 0.0002 °C	0.0001 °C	0.0001 °C - 0.0002 °C	0.0002 °C	0.0001 °C - 0.0003 °C	0.0006 °C	0.0003 °C - 0.0009 °C	0.0002 °C	0.0001 °C - 0.0002 °C	0.0003 °C	0.0002 °C - 0.0004 °C	0.0003 °C	0.0002 °C - 0.0004 °C	0.0004 °C	0.0002 °C - 0.0005 °C	0.0005 °C	0.0002 °C - 0.0007 °C	0.0005 °C	0.0003 °C - 0.0007 °C	0.0006 °C	0.0003 °C - 0.0008 °C	0.0007 °C	0.0003 °C - 0.001 °C	0.001 °C	0.0007 °C - 0.0014 °C	0.001 °C	0.0006 °C - 0.0013 °C	0.001 °C	0.0003 °C - 0.0017 °C	0.001 °C	0.0006 °C - 0.0014 °C	0.0013 °C	0.0007 °C - 0.002 °C	0.0012 °C	0.0008 °C - 0.0017 °C	0.0008 °C	0.0003 °C - 0.0013 °C	0.0017 °C	0.001 °C - 0.0024 °C
			Multiplication of preindustrial probability (-)	1.01	1.0 - >10'000	1.0	1.0 - 1.19	>10'000	2469.79 - >10'000	1.01	1.0 - >10'000	2.49	1.0 - >10'000	1.01	1.0 - >10'000	>10'000	1.01 - >10'000	1.01	1.0 - >10'000	2.6	1.0 - >10'000	1.0	1.0 - 1.0	1.0	1.0 - 1.0	>10'000	1.0 - >10'000	1.0	1.0 - 1.23	>10'000	1.1 - >10'000	1.0	1.0 - 1.05	290.8	1.01 - >10'000	>10'000	1.19 - >10'000	>10'000	1.0 - >10'000	1.7	1.01 - >10'000	1.48	1.0 - >10'000	>10'000	1.83 - >10'000	1.08	1.0 - >10'000	>10'000	1.44 - >10'000
		Bumi Resources	Contribution to intensity (°C)	0.0006 °C	0.0 °C - 0.0012 °C	0.0008 °C	-0.0001 °C - 0.0017 °C	0.0018 °C	0.001 °C - 0.0024 °C	0.0004 °C	0.0002 °C - 0.0005 °C	0.0003 °C	0.0001 °C - 0.0006 °C	0.0006 °C	0.0004 °C - 0.0008 °C	0.0011 °C	0.0006 °C - 0.0016 °C	0.0004 °C	0.0003 °C - 0.0006 °C	0.0007 °C	0.0005 °C - 0.001 °C	0.0007 °C	0.0004 °C - 0.001 °C	0.0008 °C	0.0004 °C - 0.0011 °C	0.001 °C	0.0005 °C - 0.0014 °C	0.001 °C	0.0007 °C - 0.0014 °C	0.0012 °C	0.0005 °C - 0.0016 °C	0.0013 °C	0.0006 °C - 0.0019 °C	0.0018 °C	0.0013 °C - 0.0026 °C	0.0019 °C	0.0012 °C - 0.0025 °C	0.002 °C	0.0006 °C - 0.0032 °C	0.0018 °C	0.0012 °C - 0.0026 °C	0.0025 °C	0.0014 °C - 0.0038 °C	0.0023 °C	0.0016 °C - 0.0031 °C	0.0016 °C	0.0005 °C - 0.0025 °C	0.0032 °C	0.0019 °C - 0.0045 °C
			Multiplication of preindustrial probability (-)	1.02	1.0 - >10'000	1.01	1.0 - 1.37	>10'000	4604.21 - >10'000	1.02	1.0 - >10'000	4.96	1.0 - >10'000	1.02	1.0 - >10'000	>10'000	1.03 - >10'000	1.02	1.0 - >10'000	4.65	1.01 - >10'000	1.0	1.0 - 1.01	1.0	1.0 - 1.0	>10'000	1.01 - >10'000	1.01	1.0 - 1.46	>10'000	1.19 - >10'000	1.01	1.0 - 1.09	547.11	1.02 - >10'000	>10'000	1.35 - >10'000	>10'000	1.01 - >10'000	2.3	1.01 - >10'000	1.89	1.01 - >10'000	>10'000	2.55 - >10'000	1.15	1.01 - >10'000	>10'000	1.81 - >10'000
		Pertamina	Contribution to intensity (°C)	0.0031 °C	0.0001 °C - 0.0064 °C	0.0024 °C	-0.0005 °C - 0.0052 °C	0.004 °C	0.0023 °C - 0.0054 °C	0.0046 °C	0.0027 °C - 0.0063 °C	0.0034 °C	0.0014 °C - 0.006 °C	0.005 °C	0.0032 °C - 0.0067 °C	0.0039 °C	0.002 °C - 0.0056 °C	0.0044 °C	0.0031 °C - 0.0057 °C	0.0048 °C	0.0035 °C - 0.0064 °C	0.004 °C	0.0022 °C - 0.0056 °C	0.004 °C	0.0021 °C - 0.0056 °C	0.0047 °C	0.0022 °C - 0.0066 °C	0.0043 °C	0.0028 °C - 0.0057 °C	0.004 °C	0.0018 °C - 0.0054 °C	0.0041 °C	0.0018 °C - 0.0058 °C	0.0051 °C	0.0036 °C - 0.0072 °C	0.0054 °C	0.0034 °C - 0.007 °C	0.0055 °C	0.0016 °C - 0.0089 °C	0.0048 °C	0.0031 °C - 0.0067 °C	0.0055 °C	0.003 °C - 0.0084 °C	0.0047 °C	0.0033 °C - 0.0064 °C	0.0032 °C	0.0011 °C - 0.0052 °C	0.0057 °C	0.0034 °C - 0.008 °C
			Multiplication of preindustrial probability (-)	1.1	1.0 - >10'000	1.02	1.0 - 2.13	>10'000	>10'000 - >10'000	1.28	1.01 - >10'000	40.0	1.01 - >10'000	1.19	1.02 - >10'000	>10'000	1.09 - >10'000	1.25	1.02 - >10'000	25.45	1.07 - >10'000	1.01	1.0 - 1.06	1.0	1.0 - 1.0	>10'000	1.03 - >10'000	1.04	1.01 - 2.91	>10'000	1.65 - >10'000	1.02	1.0 - 1.29	1532.65	1.04 - >10'000	>10'000	1.99 - >10'000	>10'000	1.02 - >10'000	4.35	1.03 - >10'000	2.98	1.02 - >10'000	>10'000	4.23 - >10'000	1.32	1.01 - >10'000	>10'000	2.47 - >10'000
	Japan	Inpex	Contribution to intensity (°C)	0.0001 °C	0.0 °C - 0.0002 °C	0.0002 °C	-0.0 °C - 0.0005 °C	0.0006 °C	0.0003 °C - 0.0008 °C	0.0 °C	0.0 °C - 0.0 °C	0.0 °C	0.0 °C - 0.0 °C	0.0 °C	0.0 °C - 0.0 °C	0.0003 °C	0.0002 °C - 0.0005 °C	0.0 °C	0.0 °C - 0.0 °C	0.0001 °C	0.0001 °C - 0.0001 °C	0.0001 °C	0.0001 °C - 0.0002 °C	0.0002 °C	0.0001 °C - 0.0002 °C	0.0002 °C	0.0001 °C - 0.0003 °C	0.0003 °C	0.0002 °C - 0.0004 °C	0.0004 °C	0.0002 °C - 0.0005 °C	0.0004 °C	0.0002 °C - 0.0006 °C	0.0006 °C	0.0004 °C - 0.0008 °C	0.0006 °C	0.0004 °C - 0.0008 °C	0.0006 °C	0.0002 °C - 0.001 °C	0.0006 °C	0.0004 °C - 0.0008 °C	0.0008 °C	0.0004 °C - 0.0012 °C	0.0007 °C	0.0005 °C - 0.001 °C	0.0005 °C	0.0002 °C - 0.0008 °C	0.0011 °C	0.0006 °C - 0.0015 °C
			Multiplication of preindustrial probability (-)	1.0	1.0 - >10'000	1.0	1.0 - 1.11	>10'000	1498.61 - >10'000	1.0	1.0 - 1.0	1.02	1.0 - >10'000	1.0	1.0 - >10'000	>10'000	1.01 - >10'000	1.0	1.0 - >10'000	1.43	1.0 - >10'000	1.0	1.0 - 1.0	1.0	1.0 - 1.0	>10'000	1.0 - >10'000	1.0	1.0 - 1.12	>10'000	1.06 - >10'000	1.0	1.0 - 1.03	174.17	1.01 - >10'000	>10'000	1.11 - >10'000	>10'000	1.0 - >10'000	1.42	1.0 - >10'000	1.29	1.0 - >10'000	>10'000	1.51 - >10'000	1.05	1.0 - >10'000	>10'000	1.28 - >10'000
		Taiheiyo Cement	Contribution to intensity (°C)	0.0001 °C	0.0 °C - 0.0003 °C	0.0001 °C	-0.0 °C - 0.0003 °C	0.0002 °C	0.0001 °C - 0.0003 °C	0.0002 °C	0.0001 °C - 0.0003 °C	0.0001 °C	0.0001 °C - 0.0002 °C	0.0002 °C	0.0001 °C - 0.0003 °C	0.0002 °C	0.0001 °C - 0.0003 °C	0.0002 °C	0.0001 °C - 0.0002 °C	0.0002 °C	0.0002 °C - 0.0003 °C	0.0002 °C	0.0001 °C - 0.0003 °C	0.0002 °C	0.0001 °C - 0.0003 °C	0.0002 °C	0.0001 °C - 0.0003 °C	0.0002 °C	0.0001 °C - 0.0003 °C	0.0002 °C	0.0001 °C - 0.0003 °C	0.0002 °C	0.0001 °C - 0.0003 °C	0.0003 °C	0.0002 °C - 0.0004 °C	0.0003 °C	0.0002 °C - 0.0004 °C	0.0003 °C	0.0001 °C - 0.0005 °C	0.0003 °C	0.0002 °C - 0.0004 °C	0.0003 °C	0.0002 °C - 0.0005 °C	0.0003 °C	0.0002 °C - 0.0004 °C	0.0002 °C	0.0001 °C - 0.0003 °C	0.0004 °C	0.0002 °C - 0.0005 °C
			Multiplication of preindustrial probability (-)	1.0	1.0 - >10'000	1.0	1.0 - 1.06	>10'000	611.47 - >10'000	1.01	1.0 - >10'000	2.6	1.0 - >10'000	1.01	1.0 - >10'000	>10'000	1.0 - >10'000	1.01	1.0 - >10'000	2.08	1.0 - >10'000	1.0	1.0 - 1.0	1.0	1.0 - 1.0	>10'000	1.0 - >10'000	1.0	1.0 - 1.09	>10'000	1.03 - >10'000	1.0	1.0 - 1.02	84.28	1.0 - >10'000	>10'000	1.05 - >10'000	>10'000	1.0 - >10'000	1.19	1.0 - >10'000	1.12	1.0 - >10'000	>10'000	1.2 - >10'000	1.02	1.0 - >10'000	>10'000	1.1 - >10'000
	Malaysia	Petronas	Contribution to intensity (°C)	0.0025 °C	0.0001 °C - 0.0051 °C	0.0026 °C	-0.0005 °C - 0.0055 °C	0.0049 °C	0.0028 °C - 0.0066 °C	0.0024 °C	0.0014 °C - 0.0032 °C	0.002 °C	0.0008 °C - 0.0035 °C	0.0031 °C	0.002 °C - 0.0042 °C	0.0039 °C	0.002 °C - 0.0056 °C	0.0025 °C	0.0018 °C - 0.0033 °C	0.0034 °C	0.0025 °C - 0.0045 °C	0.003 °C	0.0017 °C - 0.0042 °C	0.0032 °C	0.0017 °C - 0.0045 °C	0.004 °C	0.0018 °C - 0.0056 °C	0.0039 °C	0.0025 °C - 0.0051 °C	0.004 °C	0.0018 °C - 0.0054 °C	0.0043 °C	0.0019 °C - 0.0062 °C	0.0057 °C	0.0039 °C - 0.0079 °C	0.0059 °C	0.0038 °C - 0.0078 °C	0.0061 °C	0.0018 °C - 0.0099 °C	0.0055 °C	0.0035 °C - 0.0077 °C	0.0068 °C	0.0037 °C - 0.0104 °C	0.0059 °C	0.0041 °C - 0.0081 °C	0.0041 °C	0.0014 °C - 0.0065 °C	0.0077 °C	0.0046 °C - 0.0108 °C
			Multiplication of preindustrial probability (-)	1.08	1.0 - >10'000	1.03	1.0 - 2.19	>10'000	>10'000 - >10'000	1.14	1.01 - >10'000	23.57	1.0 - >10'000	1.12	1.01 - >10'000	>10'000	1.09 - >10'000	1.14	1.01 - >10'000	18.25	1.05 - >10'000	1.01	1.0 - 1.04	1.0	1.0 - 1.0	>10'000	1.02 - >10'000	1.03	1.01 - 2.72	>10'000	1.66 - >10'000	1.02	1.01 - 1.31	1698.19	1.05 - >10'000	>10'000	2.09 - >10'000	>10'000	1.02 - >10'000	4.86	1.03 - >10'000	3.42	1.02 - >10'000	>10'000	5.05 - >10'000	1.4	1.02 - >10'000	>10'000	2.96 - >10'000
	North Korea	North Korea	Contribution to intensity (°C)	0.0014 °C	0.0 °C - 0.0028 °C	0.0012 °C	-0.0002 °C - 0.0025 °C	0.002 °C	0.0012 °C - 0.0027 °C	0.0019 °C	0.0011 °C - 0.0025 °C	0.0014 °C	0.0006 °C - 0.0024 °C	0.002 °C	0.0013 °C - 0.0027 °C	0.0018 °C	0.001 °C - 0.0026 °C	0.0018 °C	0.0012 °C - 0.0023 °C	0.002 °C	0.0015 °C - 0.0027 °C	0.0017 °C	0.0009 °C - 0.0024 °C	0.0018 °C	0.0009 °C - 0.0025 °C	0.0021 °C	0.001 °C - 0.003 °C	0.002 °C	0.0013 °C - 0.0026 °C	0.0019 °C	0.0008 °C - 0.0025 °C	0.0019 °C	0.0009 °C - 0.0028 °C	0.0025 °C	0.0017 °C - 0.0035 °C	0.0026 °C	0.0017 °C - 0.0034 °C	0.0027 °C	0.0008 °C - 0.0043 °C	0.0023 °C	0.0015 °C - 0.0033 °C	0.0028 °C	0.0015 °C - 0.0042 °C	0.0024 °C	0.0016 °C - 0.0032 °C	0.0016 °C	0.0006 °C - 0.0026 °C	0.0029 °C	0.0017 °C - 0.004 °C
			Multiplication of preindustrial probability (-)	1.05	1.0 - >10'000	1.01	1.0 - 1.54	>10'000	5108.58 - >10'000	1.11	1.01 - >10'000	16.66	1.0 - >10'000	1.08	1.01 - >10'000	>10'000	1.04 - >10'000	1.1	1.01 - >10'000	11.29	1.03 - >10'000	1.01	1.0 - 1.02	1.0	1.0 - 1.0	>10'000	1.01 - >10'000	1.02	1.0 - 1.87	>10'000	1.31 - >10'000	1.01	1.0 - 1.14	743.03	1.02 - >10'000	>10'000	1.48 - >10'000	>10'000	1.01 - >10'000	2.65	1.01 - >10'000	1.99	1.01 - >10'000	>10'000	2.62 - >10'000	1.16	1.01 - >10'000	>10'000	1.74 - >10'000
	Thailand	Banpu	Contribution to intensity (°C)	0.0003 °C	0.0 °C - 0.0005 °C	0.0004 °C	-0.0001 °C - 0.0009 °C	0.0009 °C	0.0006 °C - 0.0013 °C	0.0 °C	0.0 °C - 0.0 °C	0.0001 °C	0.0 °C - 0.0001 °C	0.0001 °C	0.0001 °C - 0.0002 °C	0.0006 °C	0.0003 °C - 0.0009 °C	0.0001 °C	0.0001 °C - 0.0001 °C	0.0003 °C	0.0002 °C - 0.0003 °C	0.0003 °C	0.0001 °C - 0.0004 °C	0.0003 °C	0.0002 °C - 0.0005 °C	0.0005 °C	0.0002 °C - 0.0007 °C	0.0005 °C	0.0003 °C - 0.0007 °C	0.0006 °C	0.0003 °C - 0.0008 °C	0.0007 °C	0.0003 °C - 0.001 °C	0.001 °C	0.0007 °C - 0.0014 °C	0.001 °C	0.0006 °C - 0.0013 °C	0.001 °C	0.0003 °C - 0.0017 °C	0.001 °C	0.0006 °C - 0.0014 °C	0.0013 °C	0.0007 °C - 0.002 °C	0.0012 °C	0.0008 °C - 0.0016 °C	0.0008 °C	0.0003 °C - 0.0013 °C	0.0017 °C	0.001 °C - 0.0023 °C
			Multiplication of preindustrial probability (-)	1.01	1.0 - >10'000	1.0	1.0 - 1.19	>10'000	2434.68 - >10'000	1.0	1.0 - >10'000	1.74	1.0 - >10'000	1.01	1.0 - >10'000	>10'000	1.01 - >10'000	1.0	1.0 - >10'000	2.29	1.0 - >10'000	1.0	1.0 - 1.0	1.0	1.0 - 1.0	>10'000	1.0 - >10'000	1.0	1.0 - 1.22	>10'000	1.1 - >10'000	1.0	1.0 - 1.05	291.02	1.01 - >10'000	>10'000	1.19 - >10'000	>10'000	1.0 - >10'000	1.69	1.01 - >10'000	1.47	1.0 - >10'000	>10'000	1.82 - >10'000	1.08	1.0 - >10'000	>10'000	1.43 - >10'000
		PTTEP	Contribution to intensity (°C)	0.0001 °C	0.0 °C - 0.0003 °C	0.0002 °C	-0.0 °C - 0.0005 °C	0.0005 °C	0.0003 °C - 0.0007 °C	0.0001 °C	0.0 °C - 0.0001 °C	0.0001 °C	0.0 °C - 0.0001 °C	0.0001 °C	0.0001 °C - 0.0001 °C	0.0003 °C	0.0002 °C - 0.0004 °C	0.0001 °C	0.0001 °C - 0.0001 °C	0.0002 °C	0.0001 °C - 0.0002 °C	0.0002 °C	0.0001 °C - 0.0002 °C	0.0002 °C	0.0001 °C - 0.0003 °C	0.0003 °C	0.0001 °C - 0.0004 °C	0.0003 °C	0.0002 °C - 0.0004 °C	0.0003 °C	0.0001 °C - 0.0004 °C	0.0004 °C	0.0002 °C - 0.0005 °C	0.0005 °C	0.0004 °C - 0.0007 °C	0.0005 °C	0.0003 °C - 0.0007 °C	0.0005 °C	0.0002 °C - 0.0009 °C	0.0005 °C	0.0003 °C - 0.0007 °C	0.0007 °C	0.0004 °C - 0.0011 °C	0.0007 °C	0.0005 °C - 0.0009 °C	0.0005 °C	0.0002 °C - 0.0007 °C	0.001 °C	0.0006 °C - 0.0014 °C
			Multiplication of preindustrial probability (-)	1.0	1.0 - >10'000	1.0	1.0 - 1.1	>10'000	1336.38 - >10'000	1.0	1.0 - >10'000	1.7	1.0 - >10'000	1.0	1.0 - >10'000	>10'000	1.01 - >10'000	1.0	1.0 - >10'000	1.81	1.0 - >10'000	1.0	1.0 - 1.0	1.0	1.0 - 1.0	>10'000	1.0 - >10'000	1.0	1.0 - 1.12	>10'000	1.05 - >10'000	1.0	1.0 - 1.03	152.19	1.0 - >10'000	>10'000	1.1 - >10'000	>10'000	1.0 - >10'000	1.37	1.0 - >10'000	1.26	1.0 - >10'000	>10'000	1.46 - >10'000	1.05	1.0 - >10'000	>10'000	1.25 - >10'000
Europe	Austria	OMV Group	Contribution to intensity (°C)	0.0001 °C	0.0 °C - 0.0003 °C	0.0002 °C	-0.0 °C - 0.0004 °C	0.0005 °C	0.0003 °C - 0.0006 °C	0.0 °C	0.0 °C - 0.0 °C	0.0 °C	0.0 °C - 0.0001 °C	0.0001 °C	0.0 °C - 0.0001 °C	0.0003 °C	0.0002 °C - 0.0004 °C	0.0001 °C	0.0 °C - 0.0001 °C	0.0001 °C	0.0001 °C - 0.0002 °C	0.0001 °C	0.0001 °C - 0.0002 °C	0.0002 °C	0.0001 °C - 0.0002 °C	0.0002 °C	0.0001 °C - 0.0003 °C	0.0002 °C	0.0002 °C - 0.0003 °C	0.0003 °C	0.0001 °C - 0.0004 °C	0.0003 °C	0.0002 °C - 0.0005 °C	0.0005 °C	0.0003 °C - 0.0007 °C	0.0005 °C	0.0003 °C - 0.0006 °C	0.0005 °C	0.0002 °C - 0.0008 °C	0.0005 °C	0.0003 °C - 0.0007 °C	0.0006 °C	0.0004 °C - 0.001 °C	0.0006 °C	0.0004 °C - 0.0008 °C	0.0004 °C	0.0001 °C - 0.0007 °C	0.0009 °C	0.0005 °C - 0.0012 °C
			Multiplication of preindustrial probability (-)	1.0	1.0 - >10'000	1.0	1.0 - 1.09	>10'000	1195.53 - >10'000	1.0	1.0 - >10'000	1.46	1.0 - >10'000	1.0	1.0 - >10'000	>10'000	1.01 - >10'000	1.0	1.0 - >10'000	1.59	1.0 - >10'000	1.0	1.0 - 1.0	1.0	1.0 - 1.0	>10'000	1.0 - >10'000	1.0	1.0 - 1.11	>10'000	1.05 - >10'000	1.0	1.0 - 1.02	142.82	1.0 - >10'000	>10'000	1.09 - >10'000	>10'000	1.0 - >10'000	1.34	1.0 - >10'000	1.23	1.0 - >10'000	>10'000	1.41 - >10'000	1.04	1.0 - >10'000	>10'000	1.23 - >10'000
	Czech Republic	Czech Republic	Contribution to intensity (°C)	0.0009 °C	0.0 °C - 0.0019 °C	0.0009 °C	-0.0002 °C - 0.0019 °C	0.0016 °C	0.0009 °C - 0.0021 °C	0.0008 °C	0.0005 °C - 0.0011 °C	0.0007 °C	0.0003 °C - 0.0012 °C	0.0011 °C	0.0007 °C - 0.0015 °C	0.0014 °C	0.0007 °C - 0.0019 °C	0.0009 °C	0.0006 °C - 0.0012 °C	0.0012 °C	0.0009 °C - 0.0016 °C	0.0011 °C	0.0006 °C - 0.0015 °C	0.0012 °C	0.0006 °C - 0.0016 °C	0.0014 °C	0.0007 °C - 0.002 °C	0.0014 °C	0.0009 °C - 0.0018 °C	0.0014 °C	0.0006 °C - 0.0019 °C	0.0015 °C	0.0007 °C - 0.0021 °C	0.0019 °C	0.0013 °C - 0.0027 °C	0.002 °C	0.0013 °C - 0.0026 °C	0.0021 °C	0.0006 °C - 0.0033 °C	0.0018 °C	0.0012 °C - 0.0025 °C	0.0022 °C	0.0012 °C - 0.0033 °C	0.0019 °C	0.0013 °C - 0.0025 °C	0.0013 °C	0.0004 °C - 0.0021 °C	0.0023 °C	0.0014 °C - 0.0032 °C
			Multiplication of preindustrial probability (-)	1.03	1.0 - >10'000	1.01	1.0 - 1.41	>10'000	4013.57 - >10'000	1.05	1.0 - >10'000	8.96	1.0 - >10'000	1.04	1.0 - >10'000	>10'000	1.03 - >10'000	1.05	1.0 - >10'000	7.24	1.02 - >10'000	1.0	1.0 - 1.02	1.0	1.0 - 1.0	>10'000	1.01 - >10'000	1.01	1.0 - 1.61	>10'000	1.23 - >10'000	1.01	1.0 - 1.11	570.72	1.02 - >10'000	>10'000	1.37 - >10'000	>10'000	1.01 - >10'000	2.28	1.01 - >10'000	1.78	1.01 - >10'000	>10'000	2.28 - >10'000	1.13	1.01 - >10'000	>10'000	1.58 - >10'000
	Czechoslovakia	Czechoslovakia	Contribution to intensity (°C)	0.0035 °C	0.0001 °C - 0.0072 °C	0.0026 °C	-0.0005 °C - 0.0056 °C	0.0041 °C	0.0024 °C - 0.0057 °C	0.006 °C	0.0035 °C - 0.0082 °C	0.0041 °C	0.0017 °C - 0.0073 °C	0.0059 °C	0.0038 °C - 0.008 °C	0.0043 °C	0.0022 °C - 0.0061 °C	0.0053 °C	0.0038 °C - 0.0069 °C	0.0056 °C	0.0041 °C - 0.0074 °C	0.0046 °C	0.0025 °C - 0.0064 °C	0.0045 °C	0.0024 °C - 0.0064 °C	0.0053 °C	0.0024 °C - 0.0074 °C	0.0048 °C	0.0032 °C - 0.0064 °C	0.0044 °C	0.0019 °C - 0.0059 °C	0.0044 °C	0.002 °C - 0.0064 °C	0.0055 °C	0.0038 °C - 0.0077 °C	0.0058 °C	0.0037 °C - 0.0076 °C	0.006 °C	0.0018 °C - 0.0096 °C	0.0051 °C	0.0033 °C - 0.0071 °C	0.0058 °C	0.0032 °C - 0.0088 °C	0.0048 °C	0.0033 °C - 0.0066 °C	0.0033 °C	0.0011 °C - 0.0053 °C	0.0056 °C	0.0033 °C - 0.0078 °C
			Multiplication of preindustrial probability (-)	1.12	1.0 - >10'000	1.03	1.0 - 2.23	>10'000	>10'000 - >10'000	1.36	1.02 - >10'000	48.33	1.01 - >10'000	1.23	1.02 - >10'000	>10'000	1.1 - >10'000	1.3	1.02 - >10'000	29.16	1.08 - >10'000	1.01	1.0 - 1.06	1.0	1.0 - 1.0	>10'000	1.03 - >10'000	1.04	1.01 - 3.13	>10'000	1.72 - >10'000	1.02	1.01 - 1.32	1655.18	1.05 - >10'000	>10'000	2.07 - >10'000	>10'000	1.02 - >10'000	4.59	1.03 - >10'000	3.06	1.02 - >10'000	>10'000	4.32 - >10'000	1.33	1.01 - >10'000	>10'000	2.43 - >10'000
	France	TotalEnergies	Contribution to intensity (°C)	0.0051 °C	0.0002 °C - 0.0105 °C	0.0049 °C	-0.0009 °C - 0.0104 °C	0.0087 °C	0.0051 °C - 0.0119 °C	0.0057 °C	0.0033 °C - 0.0078 °C	0.0044 °C	0.0018 °C - 0.0079 °C	0.0068 °C	0.0044 °C - 0.0091 °C	0.0076 °C	0.004 °C - 0.0108 °C	0.0057 °C	0.0041 °C - 0.0074 °C	0.0072 °C	0.0053 °C - 0.0096 °C	0.0064 °C	0.0035 °C - 0.0088 °C	0.0066 °C	0.0034 °C - 0.0093 °C	0.0081 °C	0.0037 °C - 0.0114 °C	0.0077 °C	0.0051 °C - 0.0103 °C	0.0078 °C	0.0034 °C - 0.0105 °C	0.0081 °C	0.0037 °C - 0.0117 °C	0.0105 °C	0.0073 °C - 0.0148 °C	0.011 °C	0.007 °C - 0.0145 °C	0.0114 °C	0.0034 °C - 0.0184 °C	0.0101 °C	0.0065 °C - 0.0141 °C	0.0122 °C	0.0067 °C - 0.0186 °C	0.0105 °C	0.0073 °C - 0.0144 °C	0.0073 °C	0.0025 °C - 0.0116 °C	0.0132 °C	0.0079 °C - 0.0186 °C
			Multiplication of preindustrial probability (-)	1.17	1.0 - >10'000	1.05	1.0 - 3.26	>10'000	>10'000 - >10'000	1.35	1.02 - >10'000	51.96	1.01 - >10'000	1.26	1.02 - >10'000	>10'000	1.18 - >10'000	1.32	1.02 - >10'000	37.61	1.1 - >10'000	1.02	1.01 - 1.09	1.0	1.0 - 1.0	>10'000	1.05 - >10'000	1.07	1.01 - 4.46	>10'000	2.27 - >10'000	1.04	1.01 - 1.59	3162.26	1.09 - >10'000	>10'000	3.03 - >10'000	>10'000	1.04 - >10'000	8.09	1.05 - >10'000	5.35	1.04 - >10'000	>10'000	8.19 - >10'000	1.72	1.03 - >10'000	>10'000	4.38 - >10'000
	Germany	BASF	Contribution to intensity (°C)	0.0005 °C	0.0 °C - 0.0011 °C	0.0006 °C	-0.0001 °C - 0.0012 °C	0.0011 °C	0.0006 °C - 0.0015 °C	0.0005 °C	0.0003 °C - 0.0007 °C	0.0004 °C	0.0002 °C - 0.0008 °C	0.0007 °C	0.0004 °C - 0.0009 °C	0.0008 °C	0.0004 °C - 0.0012 °C	0.0005 °C	0.0004 °C - 0.0007 °C	0.0007 °C	0.0005 °C - 0.0009 °C	0.0006 °C	0.0003 °C - 0.0009 °C	0.0007 °C	0.0003 °C - 0.0009 °C	0.0008 °C	0.0004 °C - 0.0012 °C	0.0008 °C	0.0005 °C - 0.0011 °C	0.0009 °C	0.0004 °C - 0.0012 °C	0.0009 °C	0.0004 °C - 0.0013 °C	0.0012 °C	0.0009 °C - 0.0017 °C	0.0013 °C	0.0008 °C - 0.0017 °C	0.0013 °C	0.0004 °C - 0.0021 °C	0.0012 °C	0.0008 °C - 0.0017 °C	0.0015 °C	0.0008 °C - 0.0023 °C	0.0014 °C	0.0009 °C - 0.0019 °C	0.0009 °C	0.0003 °C - 0.0015 °C	0.0019 °C	0.0011 °C - 0.0026 °C
			Multiplication of preindustrial probability (-)	1.02	1.0 - >10'000	1.01	1.0 - 1.26	>10'000	2833.73 - >10'000	1.03	1.0 - >10'000	5.9	1.0 - >10'000	1.03	1.0 - >10'000	>10'000	1.02 - >10'000	1.03	1.0 - >10'000	4.57	1.01 - >10'000	1.0	1.0 - 1.01	1.0	1.0 - 1.0	>10'000	1.01 - >10'000	1.01	1.0 - 1.37	>10'000	1.14 - >10'000	1.0	1.0 - 1.07	366.94	1.01 - >10'000	>10'000	1.24 - >10'000	>10'000	1.0 - >10'000	1.84	1.01 - >10'000	1.55	1.0 - >10'000	>10'000	1.94 - >10'000	1.09	1.0 - >10'000	>10'000	1.48 - >10'000
		Heidelberg Materials	Contribution to intensity (°C)	0.0004 °C	0.0 °C - 0.0008 °C	0.0004 °C	-0.0001 °C - 0.0008 °C	0.0007 °C	0.0004 °C - 0.001 °C	0.0003 °C	0.0002 °C - 0.0005 °C	0.0003 °C	0.0001 °C - 0.0005 °C	0.0004 °C	0.0003 °C - 0.0006 °C	0.0006 °C	0.0003 °C - 0.0008 °C	0.0004 °C	0.0003 °C - 0.0005 °C	0.0005 °C	0.0004 °C - 0.0007 °C	0.0004 °C	0.0002 °C - 0.0006 °C	0.0005 °C	0.0002 °C - 0.0007 °C	0.0006 °C	0.0003 °C - 0.0008 °C	0.0006 °C	0.0004 °C - 0.0008 °C	0.0006 °C	0.0003 °C - 0.0008 °C	0.0006 °C	0.0003 °C - 0.0009 °C	0.0008 °C	0.0006 °C - 0.0012 °C	0.0009 °C	0.0006 °C - 0.0012 °C	0.0009 °C	0.0003 °C - 0.0015 °C	0.0008 °C	0.0005 °C - 0.0012 °C	0.001 °C	0.0006 °C - 0.0016 °C	0.0009 °C	0.0006 °C - 0.0012 °C	0.0006 °C	0.0002 °C - 0.001 °C	0.0011 °C	0.0007 °C - 0.0016 °C
			Multiplication of preindustrial probability (-)	1.01	1.0 - >10'000	1.0	1.0 - 1.18	>10'000	1889.41 - >10'000	1.02	1.0 - >10'000	4.29	1.0 - >10'000	1.02	1.0 - >10'000	>10'000	1.01 - >10'000	1.02	1.0 - >10'000	3.51	1.01 - >10'000	1.0	1.0 - 1.01	1.0	1.0 - 1.0	>10'000	1.0 - >10'000	1.01	1.0 - 1.26	>10'000	1.1 - >10'000	1.0	1.0 - 1.05	254.66	1.01 - >10'000	>10'000	1.16 - >10'000	>10'000	1.0 - >10'000	1.58	1.0 - >10'000	1.37	1.0 - >10'000	>10'000	1.61 - >10'000	1.06	1.0 - >10'000	>10'000	1.29 - >10'000
		RWE	Contribution to intensity (°C)	0.0026 °C	0.0001 °C - 0.0052 °C	0.0022 °C	-0.0004 °C - 0.0047 °C	0.0038 °C	0.0022 °C - 0.0051 °C	0.0034 °C	0.002 °C - 0.0047 °C	0.0025 °C	0.001 °C - 0.0045 °C	0.0038 °C	0.0024 °C - 0.0051 °C	0.0035 °C	0.0018 °C - 0.0049 °C	0.0033 °C	0.0023 °C - 0.0042 °C	0.0038 °C	0.0028 °C - 0.005 °C	0.0032 °C	0.0018 °C - 0.0045 °C	0.0033 °C	0.0017 °C - 0.0046 °C	0.004 °C	0.0018 °C - 0.0055 °C	0.0037 °C	0.0024 °C - 0.0049 °C	0.0036 °C	0.0016 °C - 0.0048 °C	0.0037 °C	0.0016 °C - 0.0053 °C	0.0047 °C	0.0033 °C - 0.0066 °C	0.0049 °C	0.0031 °C - 0.0064 °C	0.0051 °C	0.0015 °C - 0.0082 °C	0.0044 °C	0.0028 °C - 0.0062 °C	0.0052 °C	0.0029 °C - 0.008 °C	0.0045 °C	0.0031 °C - 0.0061 °C	0.0031 °C	0.0011 °C - 0.0049 °C	0.0054 °C	0.0032 °C - 0.0075 °C
			Multiplication of preindustrial probability (-)	1.09	1.0 - >10'000	1.02	1.0 - 2.02	>10'000	9633.02 - >10'000	1.21	1.01 - >10'000	30.09	1.01 - >10'000	1.15	1.01 - >10'000	>10'000	1.08 - >10'000	1.18	1.01 - >10'000	20.18	1.05 - >10'000	1.01	1.0 - 1.05	1.0	1.0 - 1.0	>10'000	1.02 - >10'000	1.03	1.01 - 2.64	>10'000	1.58 - >10'000	1.02	1.0 - 1.26	1406.09	1.04 - >10'000	>10'000	1.91 - >10'000	>10'000	1.02 - >10'000	4.12	1.02 - >10'000	2.87	1.02 - >10'000	>10'000	4.06 - >10'000	1.31	1.01 - >10'000	>10'000	2.38 - >10'000
	Italy	Eni	Contribution to intensity (°C)	0.0026 °C	0.0001 °C - 0.0053 °C	0.0025 °C	-0.0005 °C - 0.0054 °C	0.0046 °C	0.0027 °C - 0.0063 °C	0.0027 °C	0.0016 °C - 0.0037 °C	0.0021 °C	0.0009 °C - 0.0038 °C	0.0033 °C	0.0021 °C - 0.0044 °C	0.0039 °C	0.002 °C - 0.0056 °C	0.0027 °C	0.0019 °C - 0.0036 °C	0.0036 °C	0.0026 °C - 0.0047 °C	0.0032 °C	0.0017 °C - 0.0044 °C	0.0033 °C	0.0017 °C - 0.0046 °C	0.0041 °C	0.0019 °C - 0.0058 °C	0.0039 °C	0.0026 °C - 0.0052 °C	0.004 °C	0.0018 °C - 0.0054 °C	0.0042 °C	0.0019 °C - 0.0061 °C	0.0055 °C	0.0038 °C - 0.0077 °C	0.0058 °C	0.0037 °C - 0.0075 °C	0.0059 °C	0.0018 °C - 0.0096 °C	0.0053 °C	0.0034 °C - 0.0074 °C	0.0065 °C	0.0036 °C - 0.0099 °C	0.0056 °C	0.0039 °C - 0.0077 °C	0.0039 °C	0.0013 °C - 0.0062 °C	0.0072 °C	0.0043 °C - 0.0101 °C
			Multiplication of preindustrial probability (-)	1.09	1.0 - >10'000	1.03	1.0 - 2.17	>10'000	>10'000 - >10'000	1.16	1.01 - >10'000	25.4	1.0 - >10'000	1.13	1.01 - >10'000	>10'000	1.09 - >10'000	1.15	1.01 - >10'000	19.0	1.05 - >10'000	1.01	1.0 - 1.04	1.0	1.0 - 1.0	>10'000	1.02 - >10'000	1.03	1.01 - 2.76	>10'000	1.65 - >10'000	1.02	1.01 - 1.3	1648.18	1.05 - >10'000	>10'000	2.06 - >10'000	>10'000	1.02 - >10'000	4.72	1.03 - >10'000	3.31	1.02 - >10'000	>10'000	4.85 - >10'000	1.38	1.02 - >10'000	>10'000	2.84 - >10'000
	Norway	Equinor	Contribution to intensity (°C)	0.0019 °C	0.0001 °C - 0.004 °C	0.0021 °C	-0.0004 °C - 0.0044 °C	0.004 °C	0.0023 °C - 0.0054 °C	0.0016 °C	0.0009 °C - 0.0022 °C	0.0014 °C	0.0006 °C - 0.0025 °C	0.0022 °C	0.0014 °C - 0.003 °C	0.0031 °C	0.0016 °C - 0.0045 °C	0.0018 °C	0.0013 °C - 0.0023 °C	0.0025 °C	0.0019 °C - 0.0034 °C	0.0023 °C	0.0013 °C - 0.0032 °C	0.0025 °C	0.0013 °C - 0.0035 °C	0.0031 °C	0.0014 °C - 0.0044 °C	0.0031 °C	0.002 °C - 0.0041 °C	0.0032 °C	0.0014 °C - 0.0043 °C	0.0034 °C	0.0015 °C - 0.0049 °C	0.0045 °C	0.0032 °C - 0.0064 °C	0.0048 °C	0.003 °C - 0.0062 °C	0.0049 °C	0.0015 °C - 0.0079 °C	0.0044 °C	0.0028 °C - 0.0062 °C	0.0055 °C	0.0031 °C - 0.0085 °C	0.0049 °C	0.0034 °C - 0.0066 °C	0.0034 °C	0.0012 °C - 0.0054 °C	0.0064 °C	0.0038 °C - 0.009 °C
			Multiplication of preindustrial probability (-)	1.07	1.0 - >10'000	1.02	1.0 - 1.95	>10'000	>10'000 - >10'000	1.1	1.0 - >10'000	16.89	1.0 - >10'000	1.09	1.01 - >10'000	>10'000	1.07 - >10'000	1.1	1.01 - >10'000	13.9	1.04 - >10'000	1.01	1.0 - 1.03	1.0	1.0 - 1.0	>10'000	1.02 - >10'000	1.03	1.0 - 2.36	>10'000	1.52 - >10'000	1.02	1.0 - 1.25	1361.73	1.04 - >10'000	>10'000	1.88 - >10'000	>10'000	1.02 - >10'000	4.11	1.02 - >10'000	2.98	1.02 - >10'000	>10'000	4.34 - >10'000	1.33	1.01 - >10'000	>10'000	2.64 - >10'000
		Petoro	Contribution to intensity (°C)	0.001 °C	0.0 °C - 0.0021 °C	0.0012 °C	-0.0002 °C - 0.0025 °C	0.0023 °C	0.0014 °C - 0.0032 °C	0.0004 °C	0.0002 °C - 0.0005 °C	0.0005 °C	0.0002 °C - 0.0009 °C	0.0009 °C	0.0006 °C - 0.0012 °C	0.0018 °C	0.0009 °C - 0.0026 °C	0.0007 °C	0.0005 °C - 0.0008 °C	0.0013 °C	0.0009 °C - 0.0017 °C	0.0012 °C	0.0007 °C - 0.0017 °C	0.0013 °C	0.0007 °C - 0.0019 °C	0.0017 °C	0.0008 °C - 0.0024 °C	0.0017 °C	0.0011 °C - 0.0023 °C	0.0019 °C	0.0008 °C - 0.0025 °C	0.002 °C	0.0009 °C - 0.0029 °C	0.0026 °C	0.0018 °C - 0.0037 °C	0.0028 °C	0.0018 °C - 0.0036 °C	0.0029 °C	0.0009 °C - 0.0046 °C	0.0026 °C	0.0017 °C - 0.0036 °C	0.0033 °C	0.0018 °C - 0.005 °C	0.0029 °C	0.002 °C - 0.0039 °C	0.002 °C	0.0007 °C - 0.0032 °C	0.0037 °C	0.0022 °C - 0.0052 °C
			Multiplication of preindustrial probability (-)	1.03	1.0 - >10'000	1.01	1.0 - 1.55	>10'000	6011.48 - >10'000	1.02	1.0 - >10'000	6.81	1.0 - >10'000	1.04	1.0 - >10'000	>10'000	1.04 - >10'000	1.04	1.0 - >10'000	7.33	1.02 - >10'000	1.0	1.0 - 1.02	1.0	1.0 - 1.0	>10'000	1.01 - >10'000	1.01	1.0 - 1.76	>10'000	1.3 - >10'000	1.01	1.0 - 1.14	794.82	1.02 - >10'000	>10'000	1.51 - >10'000	>10'000	1.01 - >10'000	2.82	1.01 - >10'000	2.17	1.01 - >10'000	>10'000	2.97 - >10'000	1.2	1.01 - >10'000	>10'000	1.96 - >10'000
	Poland	Orlen	Contribution to intensity (°C)	0.0002 °C	0.0 °C - 0.0004 °C	0.0002 °C	-0.0 °C - 0.0005 °C	0.0004 °C	0.0002 °C - 0.0006 °C	0.0 °C	0.0 °C - 0.0 °C	0.0 °C	0.0 °C - 0.0001 °C	0.0001 °C	0.0001 °C - 0.0001 °C	0.0004 °C	0.0002 °C - 0.0005 °C	0.0001 °C	0.0 °C - 0.0001 °C	0.0002 °C	0.0001 °C - 0.0002 °C	0.0002 °C	0.0001 °C - 0.0003 °C	0.0002 °C	0.0001 °C - 0.0003 °C	0.0003 °C	0.0002 °C - 0.0005 °C	0.0003 °C	0.0002 °C - 0.0005 °C	0.0004 °C	0.0002 °C - 0.0005 °C	0.0004 °C	0.0002 °C - 0.0006 °C	0.0005 °C	0.0003 °C - 0.0007 °C	0.0005 °C	0.0003 °C - 0.0007 °C	0.0005 °C	0.0002 °C - 0.0009 °C	0.0005 °C	0.0003 °C - 0.0007 °C	0.0006 °C	0.0003 °C - 0.0009 °C	0.0005 °C	0.0003 °C - 0.0007 °C	0.0003 °C	0.0001 °C - 0.0005 °C	0.0006 °C	0.0004 °C - 0.0009 °C
			Multiplication of preindustrial probability (-)	1.01	1.0 - >10'000	1.0	1.0 - 1.11	>10'000	1058.92 - >10'000	1.0	1.0 - >10'000	1.54	1.0 - >10'000	1.0	1.0 - >10'000	>10'000	1.01 - >10'000	1.0	1.0 - >10'000	1.93	1.0 - >10'000	1.0	1.0 - 1.0	1.0	1.0 - 1.0	>10'000	1.0 - >10'000	1.0	1.0 - 1.15	>10'000	1.06 - >10'000	1.0	1.0 - 1.03	150.42	1.0 - >10'000	>10'000	1.1 - >10'000	>10'000	1.0 - >10'000	1.34	1.0 - >10'000	1.21	1.0 - >10'000	>10'000	1.34 - >10'000	1.03	1.0 - >10'000	>10'000	1.16 - >10'000
		Poland	Contribution to intensity (°C)	0.0098 °C	0.0003 °C - 0.0202 °C	0.0081 °C	-0.0015 °C - 0.0173 °C	0.0134 °C	0.0078 °C - 0.0184 °C	0.014 °C	0.0082 °C - 0.0192 °C	0.0102 °C	0.0042 °C - 0.0182 °C	0.0151 °C	0.0097 °C - 0.0203 °C	0.0129 °C	0.0067 °C - 0.0184 °C	0.0131 °C	0.0093 °C - 0.0171 °C	0.0149 °C	0.0109 °C - 0.0198 °C	0.0126 °C	0.0069 °C - 0.0176 °C	0.0126 °C	0.0066 °C - 0.0178 °C	0.0151 °C	0.0069 °C - 0.0211 °C	0.0139 °C	0.0092 °C - 0.0185 °C	0.0133 °C	0.0059 °C - 0.0178 °C	0.0135 °C	0.0061 °C - 0.0195 °C	0.0171 °C	0.0119 °C - 0.024 °C	0.018 °C	0.0115 °C - 0.0235 °C	0.0185 °C	0.0055 °C - 0.03 °C	0.0161 °C	0.0103 °C - 0.0225 °C	0.0187 °C	0.0103 °C - 0.0286 °C	0.0158 °C	0.011 °C - 0.0217 °C	0.0109 °C	0.0038 °C - 0.0175 °C	0.0189 °C	0.0113 °C - 0.0265 °C
			Multiplication of preindustrial probability (-)	1.33	1.01 - >10'000	1.08	1.01 - 4.76	>10'000	>10'000 - >10'000	1.86	1.04 - >10'000	118.24	1.02 - >10'000	1.58	1.05 - >10'000	>10'000	1.3 - >10'000	1.74	1.06 - >10'000	76.36	1.21 - >10'000	1.04	1.01 - 1.18	1.0	1.0 - 1.01	>10'000	1.09 - >10'000	1.12	1.02 - 7.22	>10'000	3.14 - >10'000	1.06	1.02 - 1.98	5144.61	1.15 - >10'000	>10'000	4.29 - >10'000	>10'000	1.06 - >10'000	12.33	1.09 - >10'000	7.69	1.06 - >10'000	>10'000	11.81 - >10'000	2.09	1.05 - >10'000	>10'000	5.81 - >10'000
	Slovakia	Slovakia	Contribution to intensity (°C)	0.0 °C	0.0 °C - 0.0001 °C	0.0 °C	-0.0 °C - 0.0001 °C	0.0001 °C	0.0 °C - 0.0001 °C	0.0 °C	0.0 °C - 0.0 °C	0.0 °C	0.0 °C - 0.0001 °C	0.0 °C	0.0 °C - 0.0001 °C	0.0001 °C	0.0 °C - 0.0001 °C	0.0 °C	0.0 °C - 0.0001 °C	0.0001 °C	0.0 °C - 0.0001 °C	0.0 °C	0.0 °C - 0.0001 °C	0.0 °C	0.0 °C - 0.0001 °C	0.0001 °C	0.0 °C - 0.0001 °C	0.0001 °C	0.0 °C - 0.0001 °C	0.0001 °C	0.0 °C - 0.0001 °C	0.0001 °C	0.0 °C - 0.0001 °C	0.0001 °C	0.0001 °C - 0.0001 °C	0.0001 °C	0.0 °C - 0.0001 °C	0.0001 °C	0.0 °C - 0.0001 °C	0.0001 °C	0.0 °C - 0.0001 °C	0.0001 °C	0.0 °C - 0.0001 °C	0.0001 °C	0.0 °C - 0.0001 °C	0.0 °C	0.0 °C - 0.0001 °C	0.0001 °C	0.0001 °C - 0.0001 °C
			Multiplication of preindustrial probability (-)	1.0	1.0 - >10'000	1.0	1.0 - 1.02	>10'000	156.44 - >10'000	1.0	1.0 - >10'000	1.34	1.0 - >10'000	1.0	1.0 - >10'000	>10'000	1.0 - >10'000	1.0	1.0 - >10'000	1.26	1.0 - >10'000	1.0	1.0 - 1.0	1.0	1.0 - 1.0	>10'000	1.0 - >10'000	1.0	1.0 - 1.02	>10'000	1.01 - >10'000	1.0	1.0 - 1.0	23.28	1.0 - >10'000	>10'000	1.01 - >10'000	>10'000	1.0 - >10'000	1.05	1.0 - >10'000	1.03	1.0 - >10'000	>10'000	1.05 - >10'000	1.0	1.0 - >10'000	>10'000	1.02 - >10'000
	Spain	Repsol	Contribution to intensity (°C)	0.0014 °C	0.0001 °C - 0.003 °C	0.0016 °C	-0.0003 °C - 0.0034 °C	0.0028 °C	0.0016 °C - 0.0038 °C	0.0008 °C	0.0005 °C - 0.0011 °C	0.0008 °C	0.0003 °C - 0.0015 °C	0.0014 °C	0.0009 °C - 0.0019 °C	0.0024 °C	0.0013 °C - 0.0035 °C	0.0011 °C	0.0007 °C - 0.0014 °C	0.0018 °C	0.0013 °C - 0.0024 °C	0.0017 °C	0.0009 °C - 0.0024 °C	0.0018 °C	0.001 °C - 0.0026 °C	0.0024 °C	0.0011 °C - 0.0033 °C	0.0024 °C	0.0016 °C - 0.0031 °C	0.0025 °C	0.0011 °C - 0.0034 °C	0.0026 °C	0.0012 °C - 0.0038 °C	0.0034 °C	0.0024 °C - 0.0048 °C	0.0036 °C	0.0023 °C - 0.0047 °C	0.0037 °C	0.0011 °C - 0.006 °C	0.0033 °C	0.0021 °C - 0.0046 °C	0.0039 °C	0.0022 °C - 0.006 °C	0.0033 °C	0.0023 °C - 0.0046 °C	0.0023 °C	0.0008 °C - 0.0037 °C	0.0041 °C	0.0024 °C - 0.0057 °C
			Multiplication of preindustrial probability (-)	1.05	1.0 - >10'000	1.02	1.0 - 1.73	>10'000	7211.01 - >10'000	1.05	1.0 - >10'000	10.41	1.0 - >10'000	1.05	1.0 - >10'000	>10'000	1.06 - >10'000	1.06	1.0 - >10'000	10.09	1.02 - >10'000	1.01	1.0 - 1.02	1.0	1.0 - 1.0	>10'000	1.01 - >10'000	1.02	1.0 - 2.05	>10'000	1.41 - >10'000	1.01	1.0 - 1.19	1030.15	1.03 - >10'000	>10'000	1.66 - >10'000	>10'000	1.01 - >10'000	3.31	1.02 - >10'000	2.4	1.01 - >10'000	>10'000	3.3 - >10'000	1.23	1.01 - >10'000	>10'000	2.05 - >10'000
	Switzerland	Glencore	Contribution to intensity (°C)	0.0009 °C	0.0 °C - 0.0018 °C	0.0013 °C	-0.0002 °C - 0.0027 °C	0.0031 °C	0.0018 °C - 0.0042 °C	0.0003 °C	0.0002 °C - 0.0004 °C	0.0004 °C	0.0002 °C - 0.0007 °C	0.0007 °C	0.0004 °C - 0.0009 °C	0.0018 °C	0.0009 °C - 0.0026 °C	0.0005 °C	0.0003 °C - 0.0006 °C	0.001 °C	0.0007 °C - 0.0013 °C	0.001 °C	0.0005 °C - 0.0014 °C	0.0011 °C	0.0006 °C - 0.0016 °C	0.0015 °C	0.0007 °C - 0.0022 °C	0.0016 °C	0.0011 °C - 0.0021 °C	0.0019 °C	0.0008 °C - 0.0025 °C	0.0021 °C	0.001 °C - 0.0031 °C	0.003 °C	0.0021 °C - 0.0042 °C	0.0032 °C	0.002 °C - 0.0041 °C	0.0032 °C	0.001 °C - 0.0053 °C	0.0031 °C	0.002 °C - 0.0043 °C	0.0043 °C	0.0023 °C - 0.0065 °C	0.0039 °C	0.0027 °C - 0.0053 °C	0.0027 °C	0.0009 °C - 0.0043 °C	0.0054 °C	0.0033 °C - 0.0076 °C
			Multiplication of preindustrial probability (-)	1.03	1.0 - >10'000	1.01	1.0 - 1.59	>10'000	7827.42 - >10'000	1.02	1.0 - >10'000	5.32	1.0 - >10'000	1.03	1.0 - >10'000	>10'000	1.04 - >10'000	1.03	1.0 - >10'000	6.03	1.01 - >10'000	1.0	1.0 - 1.01	1.0	1.0 - 1.0	>10'000	1.01 - >10'000	1.01	1.0 - 1.71	>10'000	1.31 - >10'000	1.01	1.0 - 1.15	903.52	1.03 - >10'000	>10'000	1.58 - >10'000	>10'000	1.01 - >10'000	3.19	1.02 - >10'000	2.52	1.01 - >10'000	>10'000	3.65 - >10'000	1.26	1.01 - >10'000	>10'000	2.39 - >10'000
		Holcim Group	Contribution to intensity (°C)	0.0007 °C	0.0 °C - 0.0015 °C	0.0008 °C	-0.0001 °C - 0.0016 °C	0.0015 °C	0.0008 °C - 0.002 °C	0.0006 °C	0.0003 °C - 0.0008 °C	0.0005 °C	0.0002 °C - 0.0009 °C	0.0008 °C	0.0005 °C - 0.0011 °C	0.0012 °C	0.0006 °C - 0.0017 °C	0.0007 °C	0.0005 °C - 0.0009 °C	0.0009 °C	0.0007 °C - 0.0012 °C	0.0008 °C	0.0005 °C - 0.0012 °C	0.0009 °C	0.0005 °C - 0.0013 °C	0.0012 °C	0.0005 °C - 0.0016 °C	0.0011 °C	0.0007 °C - 0.0015 °C	0.0012 °C	0.0005 °C - 0.0016 °C	0.0013 °C	0.0006 °C - 0.0018 °C	0.0017 °C	0.0012 °C - 0.0024 °C	0.0018 °C	0.0011 °C - 0.0023 °C	0.0018 °C	0.0005 °C - 0.003 °C	0.0016 °C	0.0011 °C - 0.0023 °C	0.002 °C	0.0011 °C - 0.0031 °C	0.0017 °C	0.0012 °C - 0.0024 °C	0.0012 °C	0.0004 °C - 0.0019 °C	0.0022 °C	0.0013 °C - 0.0031 °C
			Multiplication of preindustrial probability (-)	1.02	1.0 - >10'000	1.01	1.0 - 1.35	>10'000	3724.11 - >10'000	1.04	1.0 - >10'000	6.92	1.0 - >10'000	1.03	1.0 - >10'000	>10'000	1.03 - >10'000	1.04	1.0 - >10'000	5.74	1.01 - >10'000	1.0	1.0 - 1.01	1.0	1.0 - 1.0	>10'000	1.01 - >10'000	1.01	1.0 - 1.5	>10'000	1.19 - >10'000	1.01	1.0 - 1.09	507.13	1.01 - >10'000	>10'000	1.33 - >10'000	>10'000	1.01 - >10'000	2.15	1.01 - >10'000	1.72	1.01 - >10'000	>10'000	2.2 - >10'000	1.12	1.01 - >10'000	>10'000	1.56 - >10'000
	The Netherlands	Shell	Contribution to intensity (°C)	0.0135 °C	0.0005 °C - 0.0277 °C	0.0116 °C	-0.0022 °C - 0.0248 °C	0.0198 °C	0.0115 °C - 0.0271 °C	0.0179 °C	0.0105 °C - 0.0245 °C	0.0133 °C	0.0055 °C - 0.0237 °C	0.0199 °C	0.0128 °C - 0.0267 °C	0.0183 °C	0.0095 °C - 0.0262 °C	0.0171 °C	0.0122 °C - 0.0223 °C	0.02 °C	0.0147 °C - 0.0267 °C	0.0171 °C	0.0093 °C - 0.0238 °C	0.0173 °C	0.009 °C - 0.0244 °C	0.0209 °C	0.0096 °C - 0.0292 °C	0.0194 °C	0.0128 °C - 0.0258 °C	0.0189 °C	0.0083 °C - 0.0253 °C	0.0194 °C	0.0087 °C - 0.0279 °C	0.0248 °C	0.0173 °C - 0.0347 °C	0.026 °C	0.0166 °C - 0.034 °C	0.0268 °C	0.008 °C - 0.0433 °C	0.0234 °C	0.015 °C - 0.0327 °C	0.0276 °C	0.0152 °C - 0.0422 °C	0.0235 °C	0.0163 °C - 0.0321 °C	0.0162 °C	0.0056 °C - 0.026 °C	0.0285 °C	0.017 °C - 0.04 °C
			Multiplication of preindustrial probability (-)	1.45	1.01 - >10'000	1.12	1.01 - 6.39	>10'000	>10'000 - >10'000	2.09	1.05 - >10'000	153.82	1.03 - >10'000	1.77	1.06 - >10'000	>10'000	1.42 - >10'000	1.96	1.07 - >10'000	102.31	1.28 - >10'000	1.05	1.02 - 1.24	1.0	1.0 - 1.01	>10'000	1.13 - >10'000	1.17	1.03 - 9.7	>10'000	4.02 - >10'000	1.09	1.02 - 2.4	7432.61	1.22 - >10'000	>10'000	5.74 - >10'000	>10'000	1.09 - >10'000	17.49	1.13 - >10'000	10.85	1.08 - >10'000	>10'000	16.96 - >10'000	2.61	1.07 - >10'000	>10'000	8.23 - >10'000
	UK	Anglo American	Contribution to intensity (°C)	0.0024 °C	0.0001 °C - 0.005 °C	0.0024 °C	-0.0004 °C - 0.0051 °C	0.0044 °C	0.0025 °C - 0.0059 °C	0.0026 °C	0.0015 °C - 0.0036 °C	0.0021 °C	0.0009 °C - 0.0037 °C	0.0032 °C	0.002 °C - 0.0043 °C	0.0037 °C	0.0019 °C - 0.0053 °C	0.0027 °C	0.0019 °C - 0.0035 °C	0.0034 °C	0.0025 °C - 0.0045 °C	0.003 °C	0.0016 °C - 0.0042 °C	0.0031 °C	0.0016 °C - 0.0044 °C	0.0039 °C	0.0018 °C - 0.0054 °C	0.0037 °C	0.0024 °C - 0.0049 °C	0.0038 °C	0.0017 °C - 0.0051 °C	0.004 °C	0.0018 °C - 0.0057 °C	0.0052 °C	0.0036 °C - 0.0073 °C	0.0055 °C	0.0035 °C - 0.0071 °C	0.0056 °C	0.0017 °C - 0.0091 °C	0.005 °C	0.0032 °C - 0.007 °C	0.0061 °C	0.0033 °C - 0.0093 °C	0.0052 °C	0.0036 °C - 0.0071 °C	0.0036 °C	0.0012 °C - 0.0057 °C	0.0063 °C	0.0038 °C - 0.0089 °C
			Multiplication of preindustrial probability (-)	1.08	1.0 - >10'000	1.02	1.0 - 2.11	>10'000	>10'000 - >10'000	1.16	1.01 - >10'000	24.71	1.0 - >10'000	1.12	1.01 - >10'000	>10'000	1.09 - >10'000	1.15	1.01 - >10'000	18.21	1.05 - >10'000	1.01	1.0 - 1.04	1.0	1.0 - 1.0	>10'000	1.02 - >10'000	1.03	1.01 - 2.65	>10'000	1.62 - >10'000	1.02	1.0 - 1.29	1561.77	1.05 - >10'000	>10'000	2.01 - >10'000	>10'000	1.02 - >10'000	4.53	1.03 - >10'000	3.17	1.02 - >10'000	>10'000	4.56 - >10'000	1.36	1.02 - >10'000	>10'000	2.62 - >10'000
		BP	Contribution to intensity (°C)	0.0139 °C	0.0005 °C - 0.0285 °C	0.0118 °C	-0.0022 °C - 0.0252 °C	0.0199 °C	0.0116 °C - 0.0272 °C	0.019 °C	0.0111 °C - 0.0259 °C	0.0139 °C	0.0058 °C - 0.0248 °C	0.0207 °C	0.0133 °C - 0.0278 °C	0.0187 °C	0.0097 °C - 0.0267 °C	0.0179 °C	0.0127 °C - 0.0233 °C	0.0207 °C	0.0151 °C - 0.0275 °C	0.0176 °C	0.0096 °C - 0.0245 °C	0.0178 °C	0.0093 °C - 0.0251 °C	0.0215 °C	0.0098 °C - 0.03 °C	0.0199 °C	0.0131 °C - 0.0265 °C	0.0192 °C	0.0085 °C - 0.0258 °C	0.0197 °C	0.0089 °C - 0.0284 °C	0.0251 °C	0.0175 °C - 0.0352 °C	0.0263 °C	0.0168 °C - 0.0344 °C	0.0271 °C	0.0081 °C - 0.0439 °C	0.0236 °C	0.0152 °C - 0.033 °C	0.0277 °C	0.0153 °C - 0.0424 °C	0.0236 °C	0.0164 °C - 0.0323 °C	0.0163 °C	0.0056 °C - 0.0261 °C	0.0287 °C	0.0171 °C - 0.0402 °C
			Multiplication of preindustrial probability (-)	1.46	1.01 - >10'000	1.12	1.01 - 6.47	>10'000	>10'000 - >10'000	2.16	1.05 - >10'000	160.66	1.03 - >10'000	1.8	1.06 - >10'000	>10'000	1.43 - >10'000	2.01	1.08 - >10'000	105.55	1.29 - >10'000	1.05	1.02 - 1.25	1.0	1.0 - 1.01	>10'000	1.13 - >10'000	1.17	1.03 - 9.92	>10'000	4.08 - >10'000	1.09	1.02 - 2.42	7526.77	1.22 - >10'000	>10'000	5.8 - >10'000	>10'000	1.09 - >10'000	17.65	1.13 - >10'000	10.9	1.08 - >10'000	>10'000	17.03 - >10'000	2.62	1.07 - >10'000	>10'000	8.27 - >10'000
		British Coal Corporation	Contribution to intensity (°C)	0.0066 °C	0.0002 °C - 0.0136 °C	0.0051 °C	-0.0009 °C - 0.0109 °C	0.0081 °C	0.0047 °C - 0.0111 °C	0.0107 °C	0.0062 °C - 0.0146 °C	0.0075 °C	0.0031 °C - 0.0133 °C	0.0108 °C	0.007 °C - 0.0145 °C	0.0082 °C	0.0043 °C - 0.0117 °C	0.0096 °C	0.0068 °C - 0.0125 °C	0.0103 °C	0.0075 °C - 0.0137 °C	0.0086 °C	0.0047 °C - 0.0119 °C	0.0085 °C	0.0044 °C - 0.0119 °C	0.01 °C	0.0046 °C - 0.0139 °C	0.0091 °C	0.006 °C - 0.012 °C	0.0084 °C	0.0037 °C - 0.0113 °C	0.0085 °C	0.0038 °C - 0.0122 °C	0.0107 °C	0.0074 °C - 0.015 °C	0.0112 °C	0.0071 °C - 0.0147 °C	0.0115 °C	0.0034 °C - 0.0187 °C	0.0099 °C	0.0064 °C - 0.0138 °C	0.0113 °C	0.0062 °C - 0.0173 °C	0.0095 °C	0.0066 °C - 0.013 °C	0.0066 °C	0.0022 °C - 0.0105 °C	0.0111 °C	0.0066 °C - 0.0155 °C
			Multiplication of preindustrial probability (-)	1.22	1.01 - >10'000	1.05	1.01 - 3.37	>10'000	>10'000 - >10'000	1.65	1.03 - >10'000	86.72	1.02 - >10'000	1.42	1.03 - >10'000	>10'000	1.19 - >10'000	1.54	1.04 - >10'000	53.1	1.14 - >10'000	1.03	1.01 - 1.12	1.0	1.0 - 1.0	>10'000	1.06 - >10'000	1.08	1.01 - 5.05	>10'000	2.37 - >10'000	1.04	1.01 - 1.61	3201.76	1.09 - >10'000	>10'000	3.06 - >10'000	>10'000	1.04 - >10'000	7.97	1.05 - >10'000	5.04	1.03 - >10'000	>10'000	7.5 - >10'000	1.65	1.03 - >10'000	>10'000	3.83 - >10'000
		CRH	Contribution to intensity (°C)	0.0 °C	0.0 °C - 0.0 °C	0.0 °C	-0.0 °C - 0.0001 °C	0.0001 °C	0.0 °C - 0.0001 °C	0.0 °C	0.0 °C - 0.0 °C	0.0 °C	0.0 °C - 0.0 °C	0.0 °C	0.0 °C - 0.0 °C	0.0 °C	0.0 °C - 0.0001 °C	0.0 °C	0.0 °C - 0.0 °C	0.0 °C	0.0 °C - 0.0 °C	0.0 °C	0.0 °C - 0.0 °C	0.0 °C	0.0 °C - 0.0 °C	0.0 °C	0.0 °C - 0.0 °C	0.0 °C	0.0 °C - 0.0 °C	0.0 °C	0.0 °C - 0.0 °C	0.0 °C	0.0 °C - 0.0001 °C	0.0001 °C	0.0 °C - 0.0001 °C	0.0001 °C	0.0 °C - 0.0001 °C	0.0001 °C	0.0 °C - 0.0001 °C	0.0001 °C	0.0 °C - 0.0001 °C	0.0001 °C	0.0 °C - 0.0001 °C	0.0001 °C	0.0001 °C - 0.0001 °C	0.0001 °C	0.0 °C - 0.0001 °C	0.0001 °C	0.0001 °C - 0.0002 °C
			Multiplication of preindustrial probability (-)	1.0	1.0 - >10'000	1.0	1.0 - 1.01	>10'000	159.16 - >10'000	1.0	1.0 - >10'000	1.03	1.0 - >10'000	1.0	1.0 - >10'000	>10'000	1.0 - >10'000	1.0	1.0 - >10'000	1.07	1.0 - >10'000	1.0	1.0 - 1.0	1.0	1.0 - 1.0	>10'000	1.0 - >10'000	1.0	1.0 - 1.01	>10'000	1.01 - >10'000	1.0	1.0 - 1.0	17.84	1.0 - >10'000	>10'000	1.01 - >10'000	>10'000	1.0 - >10'000	1.04	1.0 - >10'000	1.03	1.0 - >10'000	>10'000	1.06 - >10'000	1.01	1.0 - >10'000	>10'000	1.03 - >10'000
		Rio Tinto	Contribution to intensity (°C)	0.0027 °C	0.0001 °C - 0.0056 °C	0.0026 °C	-0.0005 °C - 0.0055 °C	0.0042 °C	0.0024 °C - 0.0057 °C	0.0022 °C	0.0013 °C - 0.0031 °C	0.002 °C	0.0008 °C - 0.0035 °C	0.0032 °C	0.002 °C - 0.0043 °C	0.0041 °C	0.0021 °C - 0.0058 °C	0.0025 °C	0.0018 °C - 0.0033 °C	0.0036 °C	0.0027 °C - 0.0048 °C	0.0033 °C	0.0018 °C - 0.0046 °C	0.0035 °C	0.0018 °C - 0.0049 °C	0.0044 °C	0.002 °C - 0.0062 °C	0.0042 °C	0.0028 °C - 0.0056 °C	0.0042 °C	0.0019 °C - 0.0056 °C	0.0043 °C	0.0019 °C - 0.0062 °C	0.0055 °C	0.0038 °C - 0.0077 °C	0.0057 °C	0.0037 °C - 0.0075 °C	0.0059 °C	0.0018 °C - 0.0096 °C	0.0051 °C	0.0033 °C - 0.0071 °C	0.0059 °C	0.0032 °C - 0.0089 °C	0.0049 °C	0.0034 °C - 0.0067 °C	0.0034 °C	0.0012 °C - 0.0054 °C	0.0055 °C	0.0033 °C - 0.0077 °C
			Multiplication of preindustrial probability (-)	1.09	1.0 - >10'000	1.03	1.0 - 2.2	>10'000	>10'000 - >10'000	1.14	1.01 - >10'000	23.64	1.0 - >10'000	1.12	1.01 - >10'000	>10'000	1.09 - >10'000	1.14	1.01 - >10'000	19.38	1.05 - >10'000	1.01	1.0 - 1.05	1.0	1.0 - 1.0	>10'000	1.03 - >10'000	1.04	1.01 - 2.89	>10'000	1.68 - >10'000	1.02	1.01 - 1.31	1640.97	1.05 - >10'000	>10'000	2.06 - >10'000	>10'000	1.02 - >10'000	4.6	1.03 - >10'000	3.09	1.02 - >10'000	>10'000	4.36 - >10'000	1.33	1.01 - >10'000	>10'000	2.41 - >10'000
		Tullow Oil	Contribution to intensity (°C)	0.0 °C	0.0 °C - 0.0001 °C	0.0 °C	-0.0 °C - 0.0001 °C	0.0001 °C	0.0001 °C - 0.0001 °C	0.0 °C	0.0 °C - 0.0 °C	0.0 °C	0.0 °C - 0.0 °C	0.0 °C	0.0 °C - 0.0 °C	0.0001 °C	0.0 °C - 0.0001 °C	0.0 °C	0.0 °C - 0.0 °C	0.0 °C	0.0 °C - 0.0 °C	0.0 °C	0.0 °C - 0.0 °C	0.0 °C	0.0 °C - 0.0 °C	0.0001 °C	0.0 °C - 0.0001 °C	0.0001 °C	0.0 °C - 0.0001 °C	0.0001 °C	0.0 °C - 0.0001 °C	0.0001 °C	0.0 °C - 0.0001 °C	0.0001 °C	0.0001 °C - 0.0001 °C	0.0001 °C	0.0001 °C - 0.0001 °C	0.0001 °C	0.0 °C - 0.0002 °C	0.0001 °C	0.0001 °C - 0.0001 °C	0.0001 °C	0.0001 °C - 0.0002 °C	0.0001 °C	0.0001 °C - 0.0002 °C	0.0001 °C	0.0 °C - 0.0001 °C	0.0002 °C	0.0001 °C - 0.0003 °C
			Multiplication of preindustrial probability (-)	1.0	1.0 - >10'000	1.0	1.0 - 1.02	>10'000	265.9 - >10'000	1.0	1.0 - >10'000	1.06	1.0 - >10'000	1.0	1.0 - >10'000	>10'000	1.0 - >10'000	1.0	1.0 - >10'000	1.12	1.0 - >10'000	1.0	1.0 - 1.0	1.0	1.0 - 1.0	>10'000	1.0 - >10'000	1.0	1.0 - 1.02	>10'000	1.01 - >10'000	1.0	1.0 - 1.01	32.63	1.0 - >10'000	>10'000	1.02 - >10'000	>10'000	1.0 - >10'000	1.08	1.0 - >10'000	1.05	1.0 - >10'000	>10'000	1.09 - >10'000	1.01	1.0 - >10'000	>10'000	1.05 - >10'000
		UK Coal	Contribution to intensity (°C)	0.0004 °C	0.0 °C - 0.0009 °C	0.0004 °C	-0.0001 °C - 0.0008 °C	0.0006 °C	0.0003 °C - 0.0008 °C	0.0004 °C	0.0002 °C - 0.0005 °C	0.0004 °C	0.0001 °C - 0.0006 °C	0.0006 °C	0.0004 °C - 0.0008 °C	0.0006 °C	0.0003 °C - 0.0008 °C	0.0005 °C	0.0003 °C - 0.0006 °C	0.0006 °C	0.0004 °C - 0.0008 °C	0.0005 °C	0.0003 °C - 0.0007 °C	0.0005 °C	0.0003 °C - 0.0008 °C	0.0007 °C	0.0003 °C - 0.0009 °C	0.0006 °C	0.0004 °C - 0.0008 °C	0.0006 °C	0.0003 °C - 0.0008 °C	0.0006 °C	0.0003 °C - 0.0009 °C	0.0007 °C	0.0005 °C - 0.001 °C	0.0008 °C	0.0005 °C - 0.001 °C	0.0008 °C	0.0002 °C - 0.0013 °C	0.0007 °C	0.0004 °C - 0.001 °C	0.0008 °C	0.0004 °C - 0.0012 °C	0.0006 °C	0.0004 °C - 0.0009 °C	0.0004 °C	0.0002 °C - 0.0007 °C	0.0007 °C	0.0004 °C - 0.001 °C
			Multiplication of preindustrial probability (-)	1.01	1.0 - >10'000	1.0	1.0 - 1.16	>10'000	1425.89 - >10'000	1.02	1.0 - >10'000	5.1	1.0 - >10'000	1.02	1.0 - >10'000	>10'000	1.01 - >10'000	1.03	1.0 - >10'000	4.1	1.01 - >10'000	1.0	1.0 - 1.01	1.0	1.0 - 1.0	>10'000	1.0 - >10'000	1.01	1.0 - 1.27	>10'000	1.09 - >10'000	1.0	1.0 - 1.04	224.06	1.01 - >10'000	>10'000	1.14 - >10'000	>10'000	1.0 - >10'000	1.48	1.0 - >10'000	1.28	1.0 - >10'000	>10'000	1.44 - >10'000	1.04	1.0 - >10'000	>10'000	1.18 - >10'000
Former Soviet Union	Former Soviet Union	Former Soviet Union	Contribution to intensity (°C)	0.0488 °C	0.0017 °C - 0.1003 °C	0.0368 °C	-0.0069 °C - 0.0785 °C	0.0578 °C	0.0336 °C - 0.0788 °C	0.0828 °C	0.0484 °C - 0.1132 °C	0.057 °C	0.0236 °C - 0.1015 °C	0.0823 °C	0.0528 °C - 0.1102 °C	0.0594 °C	0.031 °C - 0.0849 °C	0.0734 °C	0.0521 °C - 0.0957 °C	0.0771 °C	0.0565 °C - 0.1027 °C	0.0639 °C	0.0348 °C - 0.0889 °C	0.0626 °C	0.0326 °C - 0.0882 °C	0.0734 °C	0.0337 °C - 0.1026 °C	0.0663 °C	0.0438 °C - 0.0882 °C	0.0612 °C	0.027 °C - 0.082 °C	0.0614 °C	0.0276 °C - 0.0884 °C	0.0767 °C	0.0534 °C - 0.1075 °C	0.0803 °C	0.0513 °C - 0.1053 °C	0.0828 °C	0.0246 °C - 0.1341 °C	0.0708 °C	0.0455 °C - 0.0991 °C	0.0804 °C	0.0443 °C - 0.1229 °C	0.0672 °C	0.0466 °C - 0.092 °C	0.0465 °C	0.0159 °C - 0.0743 °C	0.0778 °C	0.0466 °C - 0.1093 °C
			Multiplication of preindustrial probability (-)	2.59	1.04 - >10'000	1.37	1.04 - 18.04	>10'000	>10'000 - >10'000	6.05	1.23 - >10'000	652.29	1.12 - >10'000	4.18	1.25 - >10'000	>10'000	2.35 - >10'000	5.13	1.32 - >10'000	390.84	2.07 - >10'000	1.2	1.06 - 1.9	1.02	1.01 - 1.03	>10'000	1.44 - >10'000	1.59	1.11 - 31.14	>10'000	10.44 - >10'000	1.27	1.07 - 5.46	>10'000	1.67 - >10'000	>10'000	15.36 - >10'000	>10'000	1.27 - >10'000	51.13	1.39 - >10'000	29.59	1.24 - >10'000	>10'000	45.66 - >10'000	5.63	1.21 - >10'000	>10'000	20.31 - >10'000
	Kazakhstan	Kazakhstan	Contribution to intensity (°C)	0.0019 °C	0.0001 °C - 0.0039 °C	0.0021 °C	-0.0004 °C - 0.0044 °C	0.004 °C	0.0024 °C - 0.0055 °C	0.0017 °C	0.001 °C - 0.0023 °C	0.0014 °C	0.0006 °C - 0.0026 °C	0.0023 °C	0.0015 °C - 0.0031 °C	0.0031 °C	0.0016 °C - 0.0045 °C	0.0019 °C	0.0013 °C - 0.0024 °C	0.0026 °C	0.0019 °C - 0.0034 °C	0.0023 °C	0.0013 °C - 0.0032 °C	0.0025 °C	0.0013 °C - 0.0035 °C	0.0031 °C	0.0014 °C - 0.0043 °C	0.003 °C	0.002 °C - 0.004 °C	0.0032 °C	0.0014 °C - 0.0043 °C	0.0035 °C	0.0016 °C - 0.005 °C	0.0046 °C	0.0032 °C - 0.0064 °C	0.0048 °C	0.0031 °C - 0.0063 °C	0.005 °C	0.0015 °C - 0.008 °C	0.0045 °C	0.0029 °C - 0.0063 °C	0.0056 °C	0.0031 °C - 0.0086 °C	0.0049 °C	0.0034 °C - 0.0067 °C	0.0034 °C	0.0012 °C - 0.0054 °C	0.0064 °C	0.0038 °C - 0.009 °C
			Multiplication of preindustrial probability (-)	1.06	1.0 - >10'000	1.02	1.0 - 1.96	>10'000	>10'000 - >10'000	1.1	1.0 - >10'000	17.65	1.0 - >10'000	1.09	1.01 - >10'000	>10'000	1.07 - >10'000	1.1	1.01 - >10'000	13.99	1.04 - >10'000	1.01	1.0 - 1.03	1.0	1.0 - 1.0	>10'000	1.02 - >10'000	1.03	1.0 - 2.35	>10'000	1.53 - >10'000	1.02	1.0 - 1.25	1380.86	1.04 - >10'000	>10'000	1.89 - >10'000	>10'000	1.02 - >10'000	4.17	1.02 - >10'000	3.02	1.02 - >10'000	>10'000	4.38 - >10'000	1.34	1.02 - >10'000	>10'000	2.64 - >10'000
	Russia	Gazprom	Contribution to intensity (°C)	0.0186 °C	0.0007 °C - 0.0382 °C	0.0174 °C	-0.0032 °C - 0.0371 °C	0.0307 °C	0.0179 °C - 0.0418 °C	0.0194 °C	0.0113 °C - 0.0265 °C	0.0157 °C	0.0065 °C - 0.0279 °C	0.0244 °C	0.0157 °C - 0.0327 °C	0.027 °C	0.0141 °C - 0.0387 °C	0.0202 °C	0.0143 °C - 0.0263 °C	0.0262 °C	0.0192 °C - 0.0348 °C	0.023 °C	0.0125 °C - 0.032 °C	0.0239 °C	0.0124 °C - 0.0336 °C	0.0294 °C	0.0135 °C - 0.0411 °C	0.0278 °C	0.0184 °C - 0.037 °C	0.0279 °C	0.0123 °C - 0.0373 °C	0.029 °C	0.0131 °C - 0.0417 °C	0.0374 °C	0.0261 °C - 0.0525 °C	0.0392 °C	0.025 °C - 0.0514 °C	0.0404 °C	0.012 °C - 0.0655 °C	0.0356 °C	0.0229 °C - 0.0499 °C	0.0427 °C	0.0235 °C - 0.0652 °C	0.0367 °C	0.0254 °C - 0.0502 °C	0.0254 °C	0.0087 °C - 0.0405 °C	0.046 °C	0.0275 °C - 0.0646 °C
			Multiplication of preindustrial probability (-)	1.62	1.01 - >10'000	1.18	1.02 - 9.06	>10'000	>10'000 - >10'000	2.18	1.05 - >10'000	181.13	1.03 - >10'000	1.94	1.08 - >10'000	>10'000	1.62 - >10'000	2.14	1.09 - >10'000	133.33	1.36 - >10'000	1.07	1.02 - 1.32	1.01	1.0 - 1.01	>10'000	1.18 - >10'000	1.25	1.04 - 13.5	>10'000	5.43 - >10'000	1.13	1.03 - 3.1	>10'000	1.33 - >10'000	>10'000	8.13 - >10'000	>10'000	1.13 - >10'000	26.15	1.19 - >10'000	16.22	1.13 - >10'000	>10'000	25.73 - >10'000	3.52	1.11 - >10'000	>10'000	12.57 - >10'000
		Lukoil	Contribution to intensity (°C)	0.0015 °C	0.0001 °C - 0.003 °C	0.0018 °C	-0.0003 °C - 0.0039 °C	0.0038 °C	0.0022 °C - 0.0051 °C	0.0007 °C	0.0004 °C - 0.001 °C	0.0008 °C	0.0003 °C - 0.0014 °C	0.0014 °C	0.0009 °C - 0.0018 °C	0.0027 °C	0.0014 °C - 0.0038 °C	0.001 °C	0.0007 °C - 0.0013 °C	0.0018 °C	0.0013 °C - 0.0023 °C	0.0017 °C	0.0009 °C - 0.0023 °C	0.0019 °C	0.001 °C - 0.0026 °C	0.0025 °C	0.0011 °C - 0.0035 °C	0.0025 °C	0.0016 °C - 0.0033 °C	0.0028 °C	0.0012 °C - 0.0037 °C	0.003 °C	0.0014 °C - 0.0043 °C	0.0041 °C	0.0028 °C - 0.0057 °C	0.0043 °C	0.0027 °C - 0.0056 °C	0.0044 °C	0.0013 °C - 0.0071 °C	0.004 °C	0.0026 °C - 0.0057 °C	0.0052 °C	0.0029 °C - 0.008 °C	0.0046 °C	0.0032 °C - 0.0064 °C	0.0032 °C	0.0011 °C - 0.0051 °C	0.0063 °C	0.0037 °C - 0.0088 °C
			Multiplication of preindustrial probability (-)	1.05	1.0 - >10'000	1.02	1.0 - 1.84	>10'000	9640.31 - >10'000	1.05	1.0 - >10'000	10.1	1.0 - >10'000	1.05	1.0 - >10'000	>10'000	1.06 - >10'000	1.06	1.0 - >10'000	9.91	1.02 - >10'000	1.01	1.0 - 1.02	1.0	1.0 - 1.0	>10'000	1.01 - >10'000	1.02	1.0 - 2.11	>10'000	1.45 - >10'000	1.01	1.0 - 1.22	1223.13	1.04 - >10'000	>10'000	1.79 - >10'000	>10'000	1.01 - >10'000	3.85	1.02 - >10'000	2.87	1.02 - >10'000	>10'000	4.19 - >10'000	1.32	1.01 - >10'000	>10'000	2.6 - >10'000
		Novatek	Contribution to intensity (°C)	0.0003 °C	0.0 °C - 0.0005 °C	0.0005 °C	-0.0001 °C - 0.0011 °C	0.0015 °C	0.0009 °C - 0.002 °C	0.0 °C	0.0 °C - 0.0 °C	0.0 °C	0.0 °C - 0.0001 °C	0.0001 °C	0.0001 °C - 0.0001 °C	0.0007 °C	0.0004 °C - 0.001 °C	0.0 °C	0.0 °C - 0.0001 °C	0.0002 °C	0.0002 °C - 0.0003 °C	0.0003 °C	0.0001 °C - 0.0004 °C	0.0003 °C	0.0002 °C - 0.0005 °C	0.0005 °C	0.0002 °C - 0.0007 °C	0.0005 °C	0.0004 °C - 0.0007 °C	0.0007 °C	0.0003 °C - 0.001 °C	0.0009 °C	0.0004 °C - 0.0013 °C	0.0013 °C	0.0009 °C - 0.0018 °C	0.0014 °C	0.0009 °C - 0.0018 °C	0.0014 °C	0.0004 °C - 0.0023 °C	0.0014 °C	0.0009 °C - 0.0019 °C	0.0021 °C	0.0011 °C - 0.0032 °C	0.0019 °C	0.0013 °C - 0.0026 °C	0.0013 °C	0.0005 °C - 0.0021 °C	0.003 °C	0.0018 °C - 0.0042 °C
			Multiplication of preindustrial probability (-)	1.01	1.0 - >10'000	1.01	1.0 - 1.24	>10'000	3807.11 - >10'000	1.0	1.0 - >10'000	1.36	1.0 - >10'000	1.0	1.0 - >10'000	>10'000	1.02 - >10'000	1.0	1.0 - >10'000	2.12	1.0 - >10'000	1.0	1.0 - 1.0	1.0	1.0 - 1.0	>10'000	1.0 - >10'000	1.0	1.0 - 1.24	>10'000	1.12 - >10'000	1.0	1.0 - 1.06	389.03	1.01 - >10'000	>10'000	1.25 - >10'000	>10'000	1.0 - >10'000	1.98	1.01 - >10'000	1.74	1.01 - >10'000	>10'000	2.33 - >10'000	1.13	1.01 - >10'000	>10'000	1.78 - >10'000
		Rosneft	Contribution to intensity (°C)	0.0022 °C	0.0001 °C - 0.0046 °C	0.0025 °C	-0.0005 °C - 0.0054 °C	0.0058 °C	0.0034 °C - 0.008 °C	0.0018 °C	0.001 °C - 0.0024 °C	0.0015 °C	0.0006 °C - 0.0027 °C	0.0025 °C	0.0016 °C - 0.0034 °C	0.0037 °C	0.0019 °C - 0.0053 °C	0.002 °C	0.0014 °C - 0.0026 °C	0.0029 °C	0.0022 °C - 0.0039 °C	0.0027 °C	0.0015 °C - 0.0037 °C	0.0029 °C	0.0015 °C - 0.0041 °C	0.0037 °C	0.0017 °C - 0.0051 °C	0.0036 °C	0.0024 °C - 0.0048 °C	0.0039 °C	0.0017 °C - 0.0052 °C	0.0042 °C	0.0019 °C - 0.0061 °C	0.0058 °C	0.004 °C - 0.0081 °C	0.0061 °C	0.0039 °C - 0.0079 °C	0.0062 °C	0.0019 °C - 0.0101 °C	0.0059 °C	0.0038 °C - 0.0082 °C	0.0081 °C	0.0045 °C - 0.0124 °C	0.0074 °C	0.0052 °C - 0.0102 °C	0.0051 °C	0.0018 °C - 0.0082 °C	0.0109 °C	0.0065 °C - 0.0153 °C
			Multiplication of preindustrial probability (-)	1.08	1.0 - >10'000	1.03	1.0 - 2.17	>10'000	>10'000 - >10'000	1.11	1.0 - >10'000	18.73	1.0 - >10'000	1.1	1.01 - >10'000	>10'000	1.09 - >10'000	1.11	1.01 - >10'000	15.89	1.04 - >10'000	1.01	1.0 - 1.04	1.0	1.0 - 1.0	>10'000	1.02 - >10'000	1.03	1.01 - 2.6	>10'000	1.63 - >10'000	1.02	1.01 - 1.3	1734.91	1.05 - >10'000	>10'000	2.12 - >10'000	>10'000	1.02 - >10'000	5.15	1.03 - >10'000	3.9	1.02 - >10'000	>10'000	6.11 - >10'000	1.51	1.02 - >10'000	>10'000	3.79 - >10'000
		Russian Federation	Contribution to intensity (°C)	0.0055 °C	0.0002 °C - 0.0112 °C	0.0057 °C	-0.0011 °C - 0.0122 °C	0.0114 °C	0.0066 °C - 0.0155 °C	0.0047 °C	0.0028 °C - 0.0064 °C	0.0041 °C	0.0017 °C - 0.0073 °C	0.0065 °C	0.0042 °C - 0.0087 °C	0.0087 °C	0.0045 °C - 0.0124 °C	0.0052 °C	0.0037 °C - 0.0068 °C	0.0073 °C	0.0054 °C - 0.0098 °C	0.0066 °C	0.0036 °C - 0.0092 °C	0.007 °C	0.0037 °C - 0.0099 °C	0.0088 °C	0.0041 °C - 0.0124 °C	0.0085 °C	0.0056 °C - 0.0114 °C	0.009 °C	0.004 °C - 0.012 °C	0.0096 °C	0.0043 °C - 0.0138 °C	0.0127 °C	0.0088 °C - 0.0178 °C	0.0133 °C	0.0085 °C - 0.0174 °C	0.0137 °C	0.0041 °C - 0.0222 °C	0.0124 °C	0.008 °C - 0.0174 °C	0.0158 °C	0.0087 °C - 0.0242 °C	0.014 °C	0.0097 °C - 0.0191 °C	0.0097 °C	0.0033 °C - 0.0155 °C	0.0189 °C	0.0113 °C - 0.0266 °C
			Multiplication of preindustrial probability (-)	1.18	1.0 - >10'000	1.06	1.01 - 3.66	>10'000	>10'000 - >10'000	1.29	1.01 - >10'000	47.85	1.01 - >10'000	1.25	1.02 - >10'000	>10'000	1.2 - >10'000	1.29	1.02 - >10'000	38.1	1.1 - >10'000	1.02	1.01 - 1.09	1.0	1.0 - 1.0	>10'000	1.05 - >10'000	1.07	1.01 - 4.82	>10'000	2.45 - >10'000	1.04	1.01 - 1.69	3803.35	1.11 - >10'000	>10'000	3.44 - >10'000	>10'000	1.05 - >10'000	9.75	1.07 - >10'000	6.65	1.05 - >10'000	>10'000	10.56 - >10'000	1.96	1.04 - >10'000	>10'000	5.82 - >10'000
		Surgutneftegas	Contribution to intensity (°C)	0.0009 °C	0.0 °C - 0.0018 °C	0.0011 °C	-0.0002 °C - 0.0025 °C	0.0024 °C	0.0014 °C - 0.0032 °C	0.0002 °C	0.0001 °C - 0.0003 °C	0.0003 °C	0.0001 °C - 0.0006 °C	0.0007 °C	0.0004 °C - 0.0009 °C	0.0017 °C	0.0009 °C - 0.0024 °C	0.0004 °C	0.0003 °C - 0.0006 °C	0.001 °C	0.0007 °C - 0.0013 °C	0.001 °C	0.0005 °C - 0.0014 °C	0.0011 °C	0.0006 °C - 0.0016 °C	0.0015 °C	0.0007 °C - 0.0021 °C	0.0016 °C	0.001 °C - 0.0021 °C	0.0018 °C	0.0008 °C - 0.0024 °C	0.0019 °C	0.0009 °C - 0.0028 °C	0.0026 °C	0.0018 °C - 0.0036 °C	0.0027 °C	0.0017 °C - 0.0036 °C	0.0028 °C	0.0008 °C - 0.0045 °C	0.0026 °C	0.0016 °C - 0.0036 °C	0.0033 °C	0.0018 °C - 0.005 °C	0.0029 °C	0.002 °C - 0.004 °C	0.002 °C	0.0007 °C - 0.0032 °C	0.0038 °C	0.0023 °C - 0.0054 °C
			Multiplication of preindustrial probability (-)	1.03	1.0 - >10'000	1.01	1.0 - 1.53	>10'000	6052.61 - >10'000	1.01	1.0 - >10'000	4.85	1.0 - >10'000	1.03	1.0 - >10'000	>10'000	1.04 - >10'000	1.02	1.0 - >10'000	5.98	1.01 - >10'000	1.0	1.0 - 1.01	1.0	1.0 - 1.0	>10'000	1.01 - >10'000	1.01	1.0 - 1.69	>10'000	1.29 - >10'000	1.01	1.0 - 1.14	777.06	1.02 - >10'000	>10'000	1.5 - >10'000	>10'000	1.01 - >10'000	2.8	1.01 - >10'000	2.17	1.01 - >10'000	>10'000	2.99 - >10'000	1.2	1.01 - >10'000	>10'000	1.99 - >10'000
	Turkmenistan	TurkmenGaz	Contribution to intensity (°C)	0.0011 °C	0.0 °C - 0.0023 °C	0.0012 °C	-0.0002 °C - 0.0025 °C	0.0024 °C	0.0014 °C - 0.0033 °C	0.0008 °C	0.0005 °C - 0.0011 °C	0.0007 °C	0.0003 °C - 0.0013 °C	0.0012 °C	0.0008 °C - 0.0016 °C	0.0018 °C	0.0009 °C - 0.0025 °C	0.0009 °C	0.0007 °C - 0.0012 °C	0.0014 °C	0.001 °C - 0.0019 °C	0.0013 °C	0.0007 °C - 0.0018 °C	0.0014 °C	0.0007 °C - 0.002 °C	0.0018 °C	0.0008 °C - 0.0025 °C	0.0017 °C	0.0011 °C - 0.0023 °C	0.0018 °C	0.0008 °C - 0.0025 °C	0.002 °C	0.0009 °C - 0.0028 °C	0.0026 °C	0.0018 °C - 0.0037 °C	0.0028 °C	0.0018 °C - 0.0036 °C	0.0028 °C	0.0008 °C - 0.0046 °C	0.0026 °C	0.0017 °C - 0.0036 °C	0.0033 °C	0.0018 °C - 0.0051 °C	0.003 °C	0.002 °C - 0.004 °C	0.002 °C	0.0007 °C - 0.0033 °C	0.004 °C	0.0024 °C - 0.0056 °C
			Multiplication of preindustrial probability (-)	1.04	1.0 - >10'000	1.01	1.0 - 1.55	>10'000	6147.5 - >10'000	1.05	1.0 - >10'000	9.4	1.0 - >10'000	1.05	1.0 - >10'000	>10'000	1.04 - >10'000	1.05	1.0 - >10'000	8.24	1.02 - >10'000	1.0	1.0 - 1.02	1.0	1.0 - 1.0	>10'000	1.01 - >10'000	1.02	1.0 - 1.78	>10'000	1.3 - >10'000	1.01	1.0 - 1.14	789.63	1.02 - >10'000	>10'000	1.51 - >10'000	>10'000	1.01 - >10'000	2.83	1.01 - >10'000	2.19	1.01 - >10'000	>10'000	3.03 - >10'000	1.2	1.01 - >10'000	>10'000	2.03 - >10'000
	Ukraine	Naftogaz	Contribution to intensity (°C)	0.0004 °C	0.0 °C - 0.0008 °C	0.0004 °C	-0.0001 °C - 0.0009 °C	0.0008 °C	0.0005 °C - 0.0011 °C	0.0001 °C	0.0001 °C - 0.0002 °C	0.0002 °C	0.0001 °C - 0.0003 °C	0.0003 °C	0.0002 °C - 0.0004 °C	0.0007 °C	0.0003 °C - 0.0009 °C	0.0002 °C	0.0002 °C - 0.0003 °C	0.0004 °C	0.0003 °C - 0.0006 °C	0.0004 °C	0.0002 °C - 0.0006 °C	0.0005 °C	0.0002 °C - 0.0007 °C	0.0006 °C	0.0003 °C - 0.0009 °C	0.0006 °C	0.0004 °C - 0.0008 °C	0.0007 °C	0.0003 °C - 0.0009 °C	0.0007 °C	0.0003 °C - 0.001 °C	0.0009 °C	0.0007 °C - 0.0013 °C	0.001 °C	0.0006 °C - 0.0013 °C	0.001 °C	0.0003 °C - 0.0017 °C	0.0009 °C	0.0006 °C - 0.0013 °C	0.0011 °C	0.0006 °C - 0.0017 °C	0.001 °C	0.0007 °C - 0.0013 °C	0.0007 °C	0.0002 °C - 0.0011 °C	0.0013 °C	0.0007 °C - 0.0018 °C
			Multiplication of preindustrial probability (-)	1.01	1.0 - >10'000	1.0	1.0 - 1.2	>10'000	2097.37 - >10'000	1.01	1.0 - >10'000	3.12	1.0 - >10'000	1.01	1.0 - >10'000	>10'000	1.02 - >10'000	1.01	1.0 - >10'000	3.27	1.01 - >10'000	1.0	1.0 - 1.01	1.0	1.0 - 1.0	>10'000	1.0 - >10'000	1.01	1.0 - 1.28	>10'000	1.11 - >10'000	1.0	1.0 - 1.05	285.72	1.01 - >10'000	>10'000	1.18 - >10'000	>10'000	1.0 - >10'000	1.65	1.01 - >10'000	1.41	1.0 - >10'000	>10'000	1.68 - >10'000	1.07	1.0 - >10'000	>10'000	1.32 - >10'000
		Ukraine	Contribution to intensity (°C)	0.0017 °C	0.0001 °C - 0.0035 °C	0.0017 °C	-0.0003 °C - 0.0036 °C	0.0029 °C	0.0017 °C - 0.004 °C	0.0017 °C	0.001 °C - 0.0023 °C	0.0014 °C	0.0006 °C - 0.0025 °C	0.0022 °C	0.0014 °C - 0.003 °C	0.0026 °C	0.0013 °C - 0.0037 °C	0.0018 °C	0.0013 °C - 0.0024 °C	0.0024 °C	0.0018 °C - 0.0032 °C	0.0021 °C	0.0012 °C - 0.003 °C	0.0022 °C	0.0012 °C - 0.0031 °C	0.0027 °C	0.0013 °C - 0.0038 °C	0.0026 °C	0.0017 °C - 0.0035 °C	0.0027 °C	0.0012 °C - 0.0036 °C	0.0028 °C	0.0013 °C - 0.004 °C	0.0036 °C	0.0025 °C - 0.0051 °C	0.0038 °C	0.0024 °C - 0.005 °C	0.0039 °C	0.0012 °C - 0.0063 °C	0.0034 °C	0.0022 °C - 0.0048 °C	0.0041 °C	0.0022 °C - 0.0062 °C	0.0034 °C	0.0024 °C - 0.0047 °C	0.0024 °C	0.0008 °C - 0.0038 °C	0.0041 °C	0.0024 °C - 0.0057 °C
			Multiplication of preindustrial probability (-)	1.06	1.0 - >10'000	1.02	1.0 - 1.78	>10'000	7508.51 - >10'000	1.1	1.0 - >10'000	17.13	1.0 - >10'000	1.08	1.01 - >10'000	>10'000	1.06 - >10'000	1.1	1.01 - >10'000	13.12	1.03 - >10'000	1.01	1.0 - 1.03	1.0	1.0 - 1.0	>10'000	1.02 - >10'000	1.02	1.0 - 2.17	>10'000	1.43 - >10'000	1.01	1.0 - 1.2	1088.62	1.03 - >10'000	>10'000	1.7 - >10'000	>10'000	1.01 - >10'000	3.43	1.02 - >10'000	2.46	1.01 - >10'000	>10'000	3.37 - >10'000	1.24	1.01 - >10'000	>10'000	2.05 - >10'000
Latin America and Caribbean	Argentina	YPF	Contribution to intensity (°C)	0.0006 °C	0.0 °C - 0.0013 °C	0.0005 °C	-0.0001 °C - 0.001 °C	0.0009 °C	0.0005 °C - 0.0012 °C	0.0011 °C	0.0006 °C - 0.0015 °C	0.0008 °C	0.0003 °C - 0.0013 °C	0.0011 °C	0.0007 °C - 0.0015 °C	0.0007 °C	0.0004 °C - 0.0011 °C	0.001 °C	0.0007 °C - 0.0013 °C	0.001 °C	0.0007 °C - 0.0013 °C	0.0008 °C	0.0004 °C - 0.0011 °C	0.0008 °C	0.0004 °C - 0.0011 °C	0.0009 °C	0.0004 °C - 0.0013 °C	0.0008 °C	0.0005 °C - 0.0011 °C	0.0008 °C	0.0003 °C - 0.001 °C	0.0008 °C	0.0004 °C - 0.0011 °C	0.001 °C	0.0007 °C - 0.0014 °C	0.0011 °C	0.0007 °C - 0.0014 °C	0.0011 °C	0.0003 °C - 0.0018 °C	0.001 °C	0.0006 °C - 0.0014 °C	0.0013 °C	0.0007 °C - 0.0019 °C	0.0011 °C	0.0008 °C - 0.0015 °C	0.0008 °C	0.0003 °C - 0.0012 °C	0.0015 °C	0.0009 °C - 0.0021 °C
			Multiplication of preindustrial probability (-)	1.02	1.0 - >10'000	1.0	1.0 - 1.22	>10'000	2349.28 - >10'000	1.07	1.0 - >10'000	9.63	1.0 - >10'000	1.04	1.0 - >10'000	>10'000	1.02 - >10'000	1.05	1.0 - >10'000	6.08	1.01 - >10'000	1.0	1.0 - 1.01	1.0	1.0 - 1.0	>10'000	1.01 - >10'000	1.01	1.0 - 1.37	>10'000	1.12 - >10'000	1.0	1.0 - 1.06	309.24	1.01 - >10'000	>10'000	1.2 - >10'000	>10'000	1.0 - >10'000	1.7	1.01 - >10'000	1.46	1.0 - >10'000	>10'000	1.78 - >10'000	1.08	1.0 - >10'000	>10'000	1.39 - >10'000
	Brazil	Petrobras	Contribution to intensity (°C)	0.0024 °C	0.0001 °C - 0.0048 °C	0.0026 °C	-0.0005 °C - 0.0055 °C	0.0051 °C	0.003 °C - 0.007 °C	0.002 °C	0.0012 °C - 0.0028 °C	0.0017 °C	0.0007 °C - 0.0031 °C	0.0027 °C	0.0018 °C - 0.0037 °C	0.0039 °C	0.002 °C - 0.0056 °C	0.0022 °C	0.0016 °C - 0.0029 °C	0.0031 °C	0.0023 °C - 0.0041 °C	0.0028 °C	0.0015 °C - 0.0039 °C	0.003 °C	0.0016 °C - 0.0043 °C	0.0039 °C	0.0018 °C - 0.0054 °C	0.0038 °C	0.0025 °C - 0.005 °C	0.004 °C	0.0018 °C - 0.0054 °C	0.0043 °C	0.0019 °C - 0.0062 °C	0.0057 °C	0.004 °C - 0.008 °C	0.006 °C	0.0038 °C - 0.0079 °C	0.0062 °C	0.0018 °C - 0.01 °C	0.0056 °C	0.0036 °C - 0.0079 °C	0.0072 °C	0.0039 °C - 0.0109 °C	0.0063 °C	0.0044 °C - 0.0086 °C	0.0043 °C	0.0015 °C - 0.0069 °C	0.0083 °C	0.005 °C - 0.0117 °C
			Multiplication of preindustrial probability (-)	1.08	1.0 - >10'000	1.03	1.0 - 2.2	>10'000	>10'000 - >10'000	1.12	1.01 - >10'000	20.73	1.0 - >10'000	1.11	1.01 - >10'000	>10'000	1.09 - >10'000	1.12	1.01 - >10'000	16.76	1.04 - >10'000	1.01	1.0 - 1.04	1.0	1.0 - 1.0	>10'000	1.02 - >10'000	1.03	1.01 - 2.68	>10'000	1.66 - >10'000	1.02	1.01 - 1.31	1723.41	1.05 - >10'000	>10'000	2.11 - >10'000	>10'000	1.02 - >10'000	4.97	1.03 - >10'000	3.56	1.02 - >10'000	>10'000	5.31 - >10'000	1.43	1.02 - >10'000	>10'000	3.14 - >10'000
		Vale	Contribution to intensity (°C)	0.0 °C	0.0 °C - 0.0 °C	0.0 °C	-0.0 °C - 0.0001 °C	0.0001 °C	0.0001 °C - 0.0002 °C	0.0 °C	0.0 °C - 0.0 °C	0.0 °C	0.0 °C - 0.0 °C	0.0 °C	0.0 °C - 0.0 °C	0.0 °C	0.0 °C - 0.0001 °C	0.0 °C	0.0 °C - 0.0 °C	0.0 °C	0.0 °C - 0.0 °C	0.0 °C	0.0 °C - 0.0 °C	0.0 °C	0.0 °C - 0.0 °C	0.0 °C	0.0 °C - 0.0 °C	0.0 °C	0.0 °C - 0.0 °C	0.0001 °C	0.0 °C - 0.0001 °C	0.0001 °C	0.0 °C - 0.0001 °C	0.0001 °C	0.0001 °C - 0.0002 °C	0.0001 °C	0.0001 °C - 0.0001 °C	0.0001 °C	0.0 °C - 0.0002 °C	0.0001 °C	0.0001 °C - 0.0002 °C	0.0002 °C	0.0001 °C - 0.0003 °C	0.0002 °C	0.0001 °C - 0.0003 °C	0.0001 °C	0.0 °C - 0.0002 °C	0.0003 °C	0.0002 °C - 0.0004 °C
			Multiplication of preindustrial probability (-)	1.0	1.0 - >10'000	1.0	1.0 - 1.02	>10'000	354.0 - >10'000	1.0	1.0 - 1.0	1.0	1.0 - 1.0	1.0	1.0 - 1.0	>10'000	1.0 - >10'000	1.0	1.0 - 1.0	1.0	1.0 - >10'000	1.0	1.0 - 1.0	1.0	1.0 - 1.0	>10'000	1.0 - >10'000	1.0	1.0 - 1.01	>10'000	1.01 - >10'000	1.0	1.0 - 1.0	33.16	1.0 - >10'000	>10'000	1.02 - >10'000	>10'000	1.0 - >10'000	1.08	1.0 - >10'000	1.07	1.0 - >10'000	>10'000	1.13 - >10'000	1.01	1.0 - >10'000	>10'000	1.07 - >10'000
	Colombia	Ecopetrol	Contribution to intensity (°C)	0.0008 °C	0.0 °C - 0.0017 °C	0.0008 °C	-0.0001 °C - 0.0017 °C	0.0015 °C	0.0009 °C - 0.002 °C	0.0008 °C	0.0005 °C - 0.0012 °C	0.0007 °C	0.0003 °C - 0.0012 °C	0.0011 °C	0.0007 °C - 0.0014 °C	0.0012 °C	0.0006 °C - 0.0017 °C	0.0009 °C	0.0006 °C - 0.0012 °C	0.0011 °C	0.0008 °C - 0.0015 °C	0.001 °C	0.0005 °C - 0.0014 °C	0.001 °C	0.0005 °C - 0.0015 °C	0.0013 °C	0.0006 °C - 0.0018 °C	0.0012 °C	0.0008 °C - 0.0016 °C	0.0012 °C	0.0005 °C - 0.0016 °C	0.0013 °C	0.0006 °C - 0.0019 °C	0.0017 °C	0.0012 °C - 0.0024 °C	0.0018 °C	0.0011 °C - 0.0024 °C	0.0018 °C	0.0005 °C - 0.003 °C	0.0017 °C	0.0011 °C - 0.0023 °C	0.0021 °C	0.0011 °C - 0.0032 °C	0.0018 °C	0.0013 °C - 0.0025 °C	0.0013 °C	0.0004 °C - 0.002 °C	0.0024 °C	0.0014 °C - 0.0033 °C
			Multiplication of preindustrial probability (-)	1.03	1.0 - >10'000	1.01	1.0 - 1.36	>10'000	3827.99 - >10'000	1.05	1.0 - >10'000	8.94	1.0 - >10'000	1.04	1.0 - >10'000	>10'000	1.03 - >10'000	1.05	1.0 - >10'000	6.82	1.02 - >10'000	1.0	1.0 - 1.01	1.0	1.0 - 1.0	>10'000	1.01 - >10'000	1.01	1.0 - 1.54	>10'000	1.2 - >10'000	1.01	1.0 - 1.09	514.36	1.02 - >10'000	>10'000	1.33 - >10'000	>10'000	1.01 - >10'000	2.17	1.01 - >10'000	1.74	1.01 - >10'000	>10'000	2.25 - >10'000	1.12	1.01 - >10'000	>10'000	1.61 - >10'000
	Ecuador	PetroEcuador	Contribution to intensity (°C)	0.0004 °C	0.0 °C - 0.0008 °C	0.0004 °C	-0.0001 °C - 0.0009 °C	0.0009 °C	0.0005 °C - 0.0012 °C	0.0004 °C	0.0002 °C - 0.0005 °C	0.0003 °C	0.0001 °C - 0.0005 °C	0.0005 °C	0.0003 °C - 0.0006 °C	0.0006 °C	0.0003 °C - 0.0009 °C	0.0004 °C	0.0003 °C - 0.0005 °C	0.0005 °C	0.0004 °C - 0.0007 °C	0.0005 °C	0.0002 °C - 0.0006 °C	0.0005 °C	0.0003 °C - 0.0007 °C	0.0006 °C	0.0003 °C - 0.0009 °C	0.0006 °C	0.0004 °C - 0.0008 °C	0.0007 °C	0.0003 °C - 0.0009 °C	0.0007 °C	0.0003 °C - 0.001 °C	0.001 °C	0.0007 °C - 0.0014 °C	0.001 °C	0.0006 °C - 0.0013 °C	0.001 °C	0.0003 °C - 0.0017 °C	0.001 °C	0.0006 °C - 0.0013 °C	0.0012 °C	0.0007 °C - 0.0019 °C	0.0011 °C	0.0008 °C - 0.0015 °C	0.0007 °C	0.0003 °C - 0.0012 °C	0.0014 °C	0.0009 °C - 0.002 °C
			Multiplication of preindustrial probability (-)	1.01	1.0 - >10'000	1.0	1.0 - 1.2	>10'000	2263.85 - >10'000	1.02	1.0 - >10'000	4.45	1.0 - >10'000	1.02	1.0 - >10'000	>10'000	1.02 - >10'000	1.02	1.0 - >10'000	3.56	1.01 - >10'000	1.0	1.0 - 1.01	1.0	1.0 - 1.0	>10'000	1.0 - >10'000	1.01	1.0 - 1.28	>10'000	1.11 - >10'000	1.0	1.0 - 1.05	291.27	1.01 - >10'000	>10'000	1.19 - >10'000	>10'000	1.0 - >10'000	1.67	1.01 - >10'000	1.44	1.0 - >10'000	>10'000	1.75 - >10'000	1.07	1.0 - >10'000	>10'000	1.37 - >10'000
	Mexico	Cemex	Contribution to intensity (°C)	0.0002 °C	0.0 °C - 0.0004 °C	0.0002 °C	-0.0 °C - 0.0004 °C	0.0004 °C	0.0002 °C - 0.0005 °C	0.0002 °C	0.0001 °C - 0.0002 °C	0.0001 °C	0.0001 °C - 0.0003 °C	0.0002 °C	0.0001 °C - 0.0003 °C	0.0003 °C	0.0002 °C - 0.0004 °C	0.0002 °C	0.0001 °C - 0.0002 °C	0.0003 °C	0.0002 °C - 0.0003 °C	0.0002 °C	0.0001 °C - 0.0003 °C	0.0003 °C	0.0001 °C - 0.0004 °C	0.0003 °C	0.0001 °C - 0.0004 °C	0.0003 °C	0.0002 °C - 0.0004 °C	0.0003 °C	0.0001 °C - 0.0004 °C	0.0003 °C	0.0002 °C - 0.0005 °C	0.0004 °C	0.0003 °C - 0.0006 °C	0.0005 °C	0.0003 °C - 0.0006 °C	0.0005 °C	0.0001 °C - 0.0008 °C	0.0004 °C	0.0003 °C - 0.0006 °C	0.0005 °C	0.0003 °C - 0.0008 °C	0.0005 °C	0.0003 °C - 0.0006 °C	0.0003 °C	0.0001 °C - 0.0005 °C	0.0006 °C	0.0003 °C - 0.0008 °C
			Multiplication of preindustrial probability (-)	1.01	1.0 - >10'000	1.0	1.0 - 1.09	>10'000	968.68 - >10'000	1.01	1.0 - >10'000	2.65	1.0 - >10'000	1.01	1.0 - >10'000	>10'000	1.01 - >10'000	1.01	1.0 - >10'000	2.31	1.0 - >10'000	1.0	1.0 - 1.0	1.0	1.0 - 1.0	>10'000	1.0 - >10'000	1.0	1.0 - 1.14	>10'000	1.05 - >10'000	1.0	1.0 - 1.02	132.37	1.0 - >10'000	>10'000	1.08 - >10'000	>10'000	1.0 - >10'000	1.3	1.0 - >10'000	1.19	1.0 - >10'000	>10'000	1.31 - >10'000	1.03	1.0 - >10'000	>10'000	1.15 - >10'000
		Pemex	Contribution to intensity (°C)	0.0084 °C	0.0003 °C - 0.0172 °C	0.0075 °C	-0.0014 °C - 0.016 °C	0.013 °C	0.0076 °C - 0.0177 °C	0.0098 °C	0.0057 °C - 0.0134 °C	0.0076 °C	0.0032 °C - 0.0135 °C	0.0116 °C	0.0075 °C - 0.0156 °C	0.0118 °C	0.0061 °C - 0.0168 °C	0.0098 °C	0.007 °C - 0.0128 °C	0.0121 °C	0.0089 °C - 0.0161 °C	0.0105 °C	0.0057 °C - 0.0146 °C	0.0108 °C	0.0056 °C - 0.0152 °C	0.0131 °C	0.006 °C - 0.0184 °C	0.0123 °C	0.0081 °C - 0.0164 °C	0.0121 °C	0.0054 °C - 0.0163 °C	0.0126 °C	0.0056 °C - 0.0181 °C	0.0161 °C	0.0112 °C - 0.0226 °C	0.0169 °C	0.0108 °C - 0.0221 °C	0.0174 °C	0.0052 °C - 0.0282 °C	0.0153 °C	0.0098 °C - 0.0214 °C	0.0181 °C	0.01 °C - 0.0277 °C	0.0154 °C	0.0107 °C - 0.0211 °C	0.0106 °C	0.0037 °C - 0.017 °C	0.0186 °C	0.0111 °C - 0.026 °C
			Multiplication of preindustrial probability (-)	1.28	1.01 - >10'000	1.08	1.01 - 4.49	>10'000	>10'000 - >10'000	1.6	1.03 - >10'000	88.39	1.02 - >10'000	1.45	1.04 - >10'000	>10'000	1.27 - >10'000	1.55	1.04 - >10'000	62.2	1.17 - >10'000	1.03	1.01 - 1.15	1.0	1.0 - 1.01	>10'000	1.08 - >10'000	1.11	1.02 - 6.51	>10'000	2.96 - >10'000	1.06	1.02 - 1.91	4835.94	1.14 - >10'000	>10'000	4.1 - >10'000	>10'000	1.06 - >10'000	11.77	1.08 - >10'000	7.46	1.05 - >10'000	>10'000	11.51 - >10'000	2.06	1.05 - >10'000	>10'000	5.73 - >10'000
	Venezuela	Petroleos de Venezuela	Contribution to intensity (°C)	0.0054 °C	0.0002 °C - 0.0111 °C	0.0049 °C	-0.0009 °C - 0.0104 °C	0.0087 °C	0.0051 °C - 0.0119 °C	0.0064 °C	0.0038 °C - 0.0088 °C	0.005 °C	0.0021 °C - 0.0089 °C	0.0076 °C	0.0049 °C - 0.0102 °C	0.0076 °C	0.004 °C - 0.0109 °C	0.0064 °C	0.0046 °C - 0.0084 °C	0.0078 °C	0.0057 °C - 0.0104 °C	0.0068 °C	0.0037 °C - 0.0094 °C	0.0069 °C	0.0036 °C - 0.0098 °C	0.0085 °C	0.0039 °C - 0.0118 °C	0.0079 °C	0.0052 °C - 0.0105 °C	0.0079 °C	0.0035 °C - 0.0105 °C	0.0082 °C	0.0037 °C - 0.0117 °C	0.0105 °C	0.0073 °C - 0.0148 °C	0.011 °C	0.0071 °C - 0.0145 °C	0.0114 °C	0.0034 °C - 0.0184 °C	0.0101 °C	0.0065 °C - 0.0141 °C	0.0121 °C	0.0067 °C - 0.0185 °C	0.0104 °C	0.0072 °C - 0.0142 °C	0.0072 °C	0.0025 °C - 0.0115 °C	0.0125 °C	0.0075 °C - 0.0176 °C
			Multiplication of preindustrial probability (-)	1.18	1.0 - >10'000	1.05	1.0 - 3.27	>10'000	>10'000 - >10'000	1.39	1.02 - >10'000	58.25	1.01 - >10'000	1.29	1.02 - >10'000	>10'000	1.18 - >10'000	1.36	1.03 - >10'000	40.62	1.11 - >10'000	1.02	1.01 - 1.09	1.0	1.0 - 1.0	>10'000	1.05 - >10'000	1.07	1.01 - 4.54	>10'000	2.27 - >10'000	1.04	1.01 - 1.59	3164.22	1.09 - >10'000	>10'000	3.03 - >10'000	>10'000	1.04 - >10'000	8.1	1.05 - >10'000	5.34	1.04 - >10'000	>10'000	8.11 - >10'000	1.71	1.03 - >10'000	>10'000	4.2 - >10'000
Middle East and North Africa	Algeria	Sonatrach	Contribution to intensity (°C)	0.0043 °C	0.0002 °C - 0.0088 °C	0.0042 °C	-0.0008 °C - 0.0089 °C	0.0077 °C	0.0045 °C - 0.0105 °C	0.0045 °C	0.0026 °C - 0.0061 °C	0.0035 °C	0.0015 °C - 0.0063 °C	0.0055 °C	0.0035 °C - 0.0073 °C	0.0064 °C	0.0034 °C - 0.0092 °C	0.0046 °C	0.0032 °C - 0.0059 °C	0.0059 °C	0.0043 °C - 0.0079 °C	0.0053 °C	0.0029 °C - 0.0073 °C	0.0055 °C	0.0029 °C - 0.0077 °C	0.0068 °C	0.0031 °C - 0.0096 °C	0.0065 °C	0.0043 °C - 0.0087 °C	0.0066 °C	0.0029 °C - 0.0089 °C	0.007 °C	0.0031 °C - 0.01 °C	0.009 °C	0.0063 °C - 0.0127 °C	0.0095 °C	0.006 °C - 0.0124 °C	0.0098 °C	0.0029 °C - 0.0158 °C	0.0087 °C	0.0056 °C - 0.0122 °C	0.0107 °C	0.0059 °C - 0.0163 °C	0.0093 °C	0.0064 °C - 0.0127 °C	0.0064 °C	0.0022 °C - 0.0102 °C	0.0121 °C	0.0072 °C - 0.017 °C
			Multiplication of preindustrial probability (-)	1.14	1.0 - >10'000	1.04	1.0 - 2.93	>10'000	>10'000 - >10'000	1.27	1.01 - >10'000	41.64	1.01 - >10'000	1.21	1.02 - >10'000	>10'000	1.15 - >10'000	1.26	1.02 - >10'000	30.96	1.08 - >10'000	1.02	1.0 - 1.07	1.0	1.0 - 1.0	>10'000	1.04 - >10'000	1.06	1.01 - 3.92	>10'000	2.08 - >10'000	1.03	1.01 - 1.5	2713.51	1.08 - >10'000	>10'000	2.74 - >10'000	>10'000	1.03 - >10'000	7.14	1.05 - >10'000	4.82	1.03 - >10'000	>10'000	7.35 - >10'000	1.63	1.03 - >10'000	>10'000	4.09 - >10'000
	Bahrain	Bapco Energies	Contribution to intensity (°C)	0.0005 °C	0.0 °C - 0.0011 °C	0.0006 °C	-0.0001 °C - 0.0012 °C	0.0011 °C	0.0006 °C - 0.0015 °C	0.0005 °C	0.0003 °C - 0.0007 °C	0.0004 °C	0.0002 °C - 0.0007 °C	0.0007 °C	0.0004 °C - 0.0009 °C	0.0008 °C	0.0004 °C - 0.0012 °C	0.0005 °C	0.0004 °C - 0.0007 °C	0.0007 °C	0.0005 °C - 0.001 °C	0.0007 °C	0.0004 °C - 0.0009 °C	0.0007 °C	0.0004 °C - 0.001 °C	0.0009 °C	0.0004 °C - 0.0012 °C	0.0008 °C	0.0005 °C - 0.0011 °C	0.0009 °C	0.0004 °C - 0.0012 °C	0.0009 °C	0.0004 °C - 0.0013 °C	0.0012 °C	0.0009 °C - 0.0017 °C	0.0013 °C	0.0008 °C - 0.0017 °C	0.0013 °C	0.0004 °C - 0.0022 °C	0.0012 °C	0.0008 °C - 0.0017 °C	0.0016 °C	0.0009 °C - 0.0024 °C	0.0014 °C	0.001 °C - 0.0019 °C	0.0009 °C	0.0003 °C - 0.0015 °C	0.0018 °C	0.0011 °C - 0.0026 °C
			Multiplication of preindustrial probability (-)	1.02	1.0 - >10'000	1.01	1.0 - 1.26	>10'000	2863.5 - >10'000	1.03	1.0 - >10'000	5.82	1.0 - >10'000	1.03	1.0 - >10'000	>10'000	1.02 - >10'000	1.03	1.0 - >10'000	4.71	1.01 - >10'000	1.0	1.0 - 1.01	1.0	1.0 - 1.0	>10'000	1.01 - >10'000	1.01	1.0 - 1.37	>10'000	1.14 - >10'000	1.0	1.0 - 1.07	369.86	1.01 - >10'000	>10'000	1.24 - >10'000	>10'000	1.0 - >10'000	1.85	1.01 - >10'000	1.56	1.0 - >10'000	>10'000	1.94 - >10'000	1.09	1.0 - >10'000	>10'000	1.47 - >10'000
	Egypt	Egyptian General Petroleum	Contribution to intensity (°C)	0.0012 °C	0.0 °C - 0.0024 °C	0.0012 °C	-0.0002 °C - 0.0026 °C	0.0023 °C	0.0013 °C - 0.0031 °C	0.0013 °C	0.0007 °C - 0.0017 °C	0.001 °C	0.0004 °C - 0.0018 °C	0.0015 °C	0.001 °C - 0.002 °C	0.0019 °C	0.001 °C - 0.0027 °C	0.0013 °C	0.0009 °C - 0.0017 °C	0.0016 °C	0.0012 °C - 0.0022 °C	0.0014 °C	0.0008 °C - 0.002 °C	0.0015 °C	0.0008 °C - 0.0021 °C	0.0019 °C	0.0009 °C - 0.0027 °C	0.0018 °C	0.0012 °C - 0.0024 °C	0.0019 °C	0.0008 °C - 0.0026 °C	0.002 °C	0.0009 °C - 0.0029 °C	0.0027 °C	0.0019 °C - 0.0037 °C	0.0028 °C	0.0018 °C - 0.0036 °C	0.0029 °C	0.0009 °C - 0.0046 °C	0.0026 °C	0.0016 °C - 0.0036 °C	0.0031 °C	0.0017 °C - 0.0048 °C	0.0027 °C	0.0019 °C - 0.0037 °C	0.0019 °C	0.0006 °C - 0.003 °C	0.0035 °C	0.0021 °C - 0.0049 °C
			Multiplication of preindustrial probability (-)	1.04	1.0 - >10'000	1.01	1.0 - 1.56	>10'000	5787.58 - >10'000	1.08	1.0 - >10'000	12.38	1.0 - >10'000	1.06	1.0 - >10'000	>10'000	1.04 - >10'000	1.07	1.01 - >10'000	9.26	1.02 - >10'000	1.0	1.0 - 1.02	1.0	1.0 - 1.0	>10'000	1.01 - >10'000	1.02	1.0 - 1.82	>10'000	1.31 - >10'000	1.01	1.0 - 1.15	798.17	1.02 - >10'000	>10'000	1.51 - >10'000	>10'000	1.01 - >10'000	2.81	1.01 - >10'000	2.12	1.01 - >10'000	>10'000	2.87 - >10'000	1.19	1.01 - >10'000	>10'000	1.9 - >10'000
	Iran	National Iranian Oil Co.	Contribution to intensity (°C)	0.0116 °C	0.0004 °C - 0.0239 °C	0.011 °C	-0.0021 °C - 0.0236 °C	0.0204 °C	0.0119 °C - 0.0279 °C	0.0138 °C	0.0081 °C - 0.0189 °C	0.0105 °C	0.0044 °C - 0.0187 °C	0.016 °C	0.0103 °C - 0.0214 °C	0.0171 °C	0.0089 °C - 0.0245 °C	0.0135 °C	0.0096 °C - 0.0177 °C	0.0166 °C	0.0122 °C - 0.0221 °C	0.0145 °C	0.0079 °C - 0.0202 °C	0.0149 °C	0.0078 °C - 0.021 °C	0.0184 °C	0.0084 °C - 0.0257 °C	0.0174 °C	0.0115 °C - 0.0232 °C	0.0176 °C	0.0078 °C - 0.0236 °C	0.0185 °C	0.0083 °C - 0.0266 °C	0.024 °C	0.0167 °C - 0.0336 °C	0.0251 °C	0.0161 °C - 0.033 °C	0.0259 °C	0.0077 °C - 0.042 °C	0.023 °C	0.0148 °C - 0.0323 °C	0.0284 °C	0.0156 °C - 0.0434 °C	0.0247 °C	0.0172 °C - 0.0338 °C	0.0171 °C	0.0059 °C - 0.0273 °C	0.032 °C	0.0191 °C - 0.0449 °C
			Multiplication of preindustrial probability (-)	1.39	1.01 - >10'000	1.11	1.01 - 6.13	>10'000	>10'000 - >10'000	1.84	1.04 - >10'000	121.84	1.02 - >10'000	1.62	1.05 - >10'000	>10'000	1.4 - >10'000	1.76	1.06 - >10'000	85.09	1.23 - >10'000	1.04	1.01 - 1.2	1.0	1.0 - 1.01	>10'000	1.11 - >10'000	1.15	1.03 - 8.81	>10'000	3.83 - >10'000	1.08	1.02 - 2.33	7201.55	1.21 - >10'000	>10'000	5.6 - >10'000	>10'000	1.09 - >10'000	17.27	1.13 - >10'000	11.14	1.08 - >10'000	>10'000	17.8 - >10'000	2.7	1.08 - >10'000	>10'000	9.1 - >10'000
	Iraq	Iraq National Oil Company	Contribution to intensity (°C)	0.0035 °C	0.0001 °C - 0.0073 °C	0.0033 °C	-0.0006 °C - 0.0071 °C	0.0064 °C	0.0037 °C - 0.0087 °C	0.0044 °C	0.0026 °C - 0.006 °C	0.0033 °C	0.0014 °C - 0.0059 °C	0.005 °C	0.0032 °C - 0.0068 °C	0.0051 °C	0.0027 °C - 0.0073 °C	0.0043 °C	0.0031 °C - 0.0056 °C	0.0051 °C	0.0038 °C - 0.0069 °C	0.0044 °C	0.0024 °C - 0.0062 °C	0.0046 °C	0.0024 °C - 0.0064 °C	0.0056 °C	0.0026 °C - 0.0078 °C	0.0052 °C	0.0035 °C - 0.007 °C	0.0053 °C	0.0023 °C - 0.0071 °C	0.0056 °C	0.0025 °C - 0.008 °C	0.0073 °C	0.0051 °C - 0.0102 °C	0.0076 °C	0.0049 °C - 0.01 °C	0.0078 °C	0.0023 °C - 0.0127 °C	0.007 °C	0.0045 °C - 0.0098 °C	0.0089 °C	0.0049 °C - 0.0135 °C	0.0078 °C	0.0054 °C - 0.0107 °C	0.0054 °C	0.0019 °C - 0.0086 °C	0.0105 °C	0.0063 °C - 0.0147 °C
			Multiplication of preindustrial probability (-)	1.12	1.0 - >10'000	1.03	1.0 - 2.54	>10'000	>10'000 - >10'000	1.27	1.01 - >10'000	39.37	1.01 - >10'000	1.19	1.02 - >10'000	>10'000	1.12 - >10'000	1.24	1.02 - >10'000	27.03	1.07 - >10'000	1.01	1.0 - 1.06	1.0	1.0 - 1.0	>10'000	1.03 - >10'000	1.05	1.01 - 3.34	>10'000	1.86 - >10'000	1.02	1.01 - 1.4	2176.48	1.06 - >10'000	>10'000	2.4 - >10'000	>10'000	1.03 - >10'000	5.96	1.04 - >10'000	4.17	1.03 - >10'000	>10'000	6.36 - >10'000	1.54	1.02 - >10'000	>10'000	3.68 - >10'000
	Kuwait	Kuwait Petroleum Corp.	Contribution to intensity (°C)	0.0042 °C	0.0001 °C - 0.0086 °C	0.0039 °C	-0.0007 °C - 0.0084 °C	0.0073 °C	0.0043 °C - 0.01 °C	0.0049 °C	0.0028 °C - 0.0067 °C	0.0038 °C	0.0016 °C - 0.0067 °C	0.0057 °C	0.0037 °C - 0.0077 °C	0.0061 °C	0.0032 °C - 0.0087 °C	0.0048 °C	0.0034 °C - 0.0063 °C	0.006 °C	0.0044 °C - 0.008 °C	0.0052 °C	0.0028 °C - 0.0072 °C	0.0054 °C	0.0028 °C - 0.0076 °C	0.0066 °C	0.003 °C - 0.0092 °C	0.0062 °C	0.0041 °C - 0.0083 °C	0.0063 °C	0.0028 °C - 0.0084 °C	0.0066 °C	0.003 °C - 0.0094 °C	0.0086 °C	0.006 °C - 0.012 °C	0.009 °C	0.0057 °C - 0.0118 °C	0.0092 °C	0.0027 °C - 0.015 °C	0.0082 °C	0.0053 °C - 0.0116 °C	0.0102 °C	0.0056 °C - 0.0155 °C	0.0088 °C	0.0061 °C - 0.0121 °C	0.0061 °C	0.0021 °C - 0.0098 °C	0.0113 °C	0.0068 °C - 0.0159 °C
			Multiplication of preindustrial probability (-)	1.14	1.0 - >10'000	1.04	1.0 - 2.82	>10'000	>10'000 - >10'000	1.3	1.01 - >10'000	44.23	1.01 - >10'000	1.22	1.02 - >10'000	>10'000	1.14 - >10'000	1.27	1.02 - >10'000	31.27	1.08 - >10'000	1.02	1.0 - 1.07	1.0	1.0 - 1.0	>10'000	1.04 - >10'000	1.05	1.01 - 3.77	>10'000	2.02 - >10'000	1.03	1.01 - 1.47	2567.92	1.08 - >10'000	>10'000	2.65 - >10'000	>10'000	1.03 - >10'000	6.82	1.04 - >10'000	4.64	1.03 - >10'000	>10'000	7.06 - >10'000	1.61	1.03 - >10'000	>10'000	3.9 - >10'000
	Libya	Libya National Oil Corp.	Contribution to intensity (°C)	0.0026 °C	0.0001 °C - 0.0053 °C	0.0023 °C	-0.0004 °C - 0.005 °C	0.004 °C	0.0023 °C - 0.0054 °C	0.0032 °C	0.0019 °C - 0.0043 °C	0.0024 °C	0.001 °C - 0.0042 °C	0.0036 °C	0.0023 °C - 0.0048 °C	0.0037 °C	0.0019 °C - 0.0053 °C	0.0031 °C	0.0022 °C - 0.004 °C	0.0037 °C	0.0027 °C - 0.0049 °C	0.0032 °C	0.0018 °C - 0.0045 °C	0.0033 °C	0.0017 °C - 0.0047 °C	0.0041 °C	0.0019 °C - 0.0057 °C	0.0038 °C	0.0025 °C - 0.0051 °C	0.0038 °C	0.0017 °C - 0.0051 °C	0.0039 °C	0.0018 °C - 0.0056 °C	0.005 °C	0.0035 °C - 0.007 °C	0.0053 °C	0.0034 °C - 0.0069 °C	0.0054 °C	0.0016 °C - 0.0088 °C	0.0047 °C	0.003 °C - 0.0066 °C	0.0055 °C	0.003 °C - 0.0084 °C	0.0047 °C	0.0033 °C - 0.0064 °C	0.0032 °C	0.0011 °C - 0.0052 °C	0.0057 °C	0.0034 °C - 0.008 °C
			Multiplication of preindustrial probability (-)	1.09	1.0 - >10'000	1.02	1.0 - 2.09	>10'000	>10'000 - >10'000	1.19	1.01 - >10'000	28.43	1.01 - >10'000	1.14	1.01 - >10'000	>10'000	1.09 - >10'000	1.17	1.01 - >10'000	19.75	1.05 - >10'000	1.01	1.0 - 1.04	1.0	1.0 - 1.0	>10'000	1.02 - >10'000	1.03	1.01 - 2.72	>10'000	1.62 - >10'000	1.02	1.0 - 1.28	1504.07	1.04 - >10'000	>10'000	1.97 - >10'000	>10'000	1.02 - >10'000	4.32	1.03 - >10'000	2.98	1.02 - >10'000	>10'000	4.23 - >10'000	1.32	1.01 - >10'000	>10'000	2.46 - >10'000
	Oman	Petroleum Development Oman	Contribution to intensity (°C)	0.0011 °C	0.0 °C - 0.0023 °C	0.0012 °C	-0.0002 °C - 0.0025 °C	0.0022 °C	0.0013 °C - 0.003 °C	0.0012 °C	0.0007 °C - 0.0016 °C	0.0009 °C	0.0004 °C - 0.0017 °C	0.0015 °C	0.0009 °C - 0.002 °C	0.0018 °C	0.0009 °C - 0.0025 °C	0.0012 °C	0.0009 °C - 0.0016 °C	0.0016 °C	0.0012 °C - 0.0021 °C	0.0014 °C	0.0008 °C - 0.0019 °C	0.0015 °C	0.0008 °C - 0.0021 °C	0.0018 °C	0.0008 °C - 0.0025 °C	0.0018 °C	0.0012 °C - 0.0023 °C	0.0018 °C	0.0008 °C - 0.0024 °C	0.0019 °C	0.0009 °C - 0.0028 °C	0.0025 °C	0.0018 °C - 0.0036 °C	0.0027 °C	0.0017 °C - 0.0035 °C	0.0027 °C	0.0008 °C - 0.0044 °C	0.0025 °C	0.0016 °C - 0.0034 °C	0.0031 °C	0.0017 °C - 0.0047 °C	0.0027 °C	0.0018 °C - 0.0036 °C	0.0018 °C	0.0006 °C - 0.0029 °C	0.0035 °C	0.0021 °C - 0.0049 °C
			Multiplication of preindustrial probability (-)	1.04	1.0 - >10'000	1.01	1.0 - 1.54	>10'000	5645.77 - >10'000	1.07	1.0 - >10'000	11.83	1.0 - >10'000	1.06	1.0 - >10'000	>10'000	1.04 - >10'000	1.07	1.01 - >10'000	8.99	1.02 - >10'000	1.0	1.0 - 1.02	1.0	1.0 - 1.0	>10'000	1.01 - >10'000	1.02	1.0 - 1.78	>10'000	1.3 - >10'000	1.01	1.0 - 1.14	761.04	1.02 - >10'000	>10'000	1.49 - >10'000	>10'000	1.01 - >10'000	2.73	1.01 - >10'000	2.1	1.01 - >10'000	>10'000	2.84 - >10'000	1.18	1.01 - >10'000	>10'000	1.9 - >10'000
	Qatar	QatarEnergy	Contribution to intensity (°C)	0.0018 °C	0.0001 °C - 0.0037 °C	0.0024 °C	-0.0004 °C - 0.0051 °C	0.0048 °C	0.0028 °C - 0.0066 °C	0.0015 °C	0.0009 °C - 0.002 °C	0.0013 °C	0.0005 °C - 0.0022 °C	0.002 °C	0.0013 °C - 0.0027 °C	0.0034 °C	0.0018 °C - 0.0049 °C	0.0016 °C	0.0011 °C - 0.0021 °C	0.0023 °C	0.0017 °C - 0.003 °C	0.0021 °C	0.0011 °C - 0.0029 °C	0.0023 °C	0.0012 °C - 0.0032 °C	0.003 °C	0.0014 °C - 0.0042 °C	0.003 °C	0.002 °C - 0.004 °C	0.0035 °C	0.0016 °C - 0.0047 °C	0.004 °C	0.0018 °C - 0.0057 °C	0.0054 °C	0.0038 °C - 0.0076 °C	0.0057 °C	0.0036 °C - 0.0075 °C	0.0059 °C	0.0017 °C - 0.0095 °C	0.0054 °C	0.0035 °C - 0.0075 °C	0.0067 °C	0.0037 °C - 0.0103 °C	0.0058 °C	0.004 °C - 0.008 °C	0.004 °C	0.0014 °C - 0.0065 °C	0.0074 °C	0.0044 °C - 0.0104 °C
			Multiplication of preindustrial probability (-)	1.06	1.0 - >10'000	1.02	1.0 - 2.11	>10'000	>10'000 - >10'000	1.09	1.0 - >10'000	15.37	1.0 - >10'000	1.08	1.01 - >10'000	>10'000	1.08 - >10'000	1.09	1.01 - >10'000	12.56	1.03 - >10'000	1.01	1.0 - 1.03	1.0	1.0 - 1.0	>10'000	1.02 - >10'000	1.03	1.0 - 2.35	>10'000	1.58 - >10'000	1.02	1.0 - 1.29	1629.1	1.05 - >10'000	>10'000	2.05 - >10'000	>10'000	1.02 - >10'000	4.78	1.03 - >10'000	3.41	1.02 - >10'000	>10'000	5.01 - >10'000	1.4	1.02 - >10'000	>10'000	2.89 - >10'000
	Saudi Arabia	Saudi Aramco	Contribution to intensity (°C)	0.0186 °C	0.0007 °C - 0.0383 °C	0.0176 °C	-0.0033 °C - 0.0375 °C	0.0323 °C	0.0188 °C - 0.0441 °C	0.0215 °C	0.0126 °C - 0.0294 °C	0.0166 °C	0.0069 °C - 0.0296 °C	0.0254 °C	0.0163 °C - 0.034 °C	0.0272 °C	0.0142 °C - 0.039 °C	0.0214 °C	0.0152 °C - 0.0279 °C	0.0266 °C	0.0195 °C - 0.0354 °C	0.0232 °C	0.0126 °C - 0.0323 °C	0.0239 °C	0.0125 °C - 0.0337 °C	0.0295 °C	0.0135 °C - 0.0411 °C	0.0278 °C	0.0184 °C - 0.037 °C	0.0281 °C	0.0124 °C - 0.0376 °C	0.0294 °C	0.0132 °C - 0.0423 °C	0.0382 °C	0.0266 °C - 0.0535 °C	0.04 °C	0.0255 °C - 0.0524 °C	0.0412 °C	0.0123 °C - 0.0668 °C	0.0367 °C	0.0236 °C - 0.0513 °C	0.045 °C	0.0248 °C - 0.0687 °C	0.039 °C	0.027 °C - 0.0533 °C	0.0269 °C	0.0092 °C - 0.0431 °C	0.0498 °C	0.0298 °C - 0.0699 °C
			Multiplication of preindustrial probability (-)	1.62	1.01 - >10'000	1.18	1.02 - 9.16	>10'000	>10'000 - >10'000	2.31	1.06 - >10'000	191.55	1.03 - >10'000	1.98	1.08 - >10'000	>10'000	1.63 - >10'000	2.2	1.09 - >10'000	135.35	1.37 - >10'000	1.07	1.02 - 1.33	1.01	1.0 - 1.01	>10'000	1.18 - >10'000	1.25	1.04 - 13.52	>10'000	5.46 - >10'000	1.13	1.04 - 3.12	>10'000	1.34 - >10'000	>10'000	8.27 - >10'000	>10'000	1.14 - >10'000	26.9	1.2 - >10'000	17.03	1.13 - >10'000	>10'000	27.25 - >10'000	3.68	1.12 - >10'000	>10'000	13.49 - >10'000
	Syria	Syrian Petroleum	Contribution to intensity (°C)	0.0006 °C	0.0 °C - 0.0012 °C	0.0005 °C	-0.0001 °C - 0.0012 °C	0.0009 °C	0.0005 °C - 0.0012 °C	0.0007 °C	0.0004 °C - 0.0009 °C	0.0005 °C	0.0002 °C - 0.0009 °C	0.0008 °C	0.0005 °C - 0.0011 °C	0.0009 °C	0.0004 °C - 0.0012 °C	0.0007 °C	0.0005 °C - 0.0009 °C	0.0009 °C	0.0006 °C - 0.0011 °C	0.0008 °C	0.0004 °C - 0.001 °C	0.0008 °C	0.0004 °C - 0.0011 °C	0.0009 °C	0.0004 °C - 0.0013 °C	0.0009 °C	0.0006 °C - 0.0012 °C	0.0009 °C	0.0004 °C - 0.0012 °C	0.0009 °C	0.0004 °C - 0.0013 °C	0.0011 °C	0.0008 °C - 0.0016 °C	0.0012 °C	0.0008 °C - 0.0016 °C	0.0012 °C	0.0004 °C - 0.002 °C	0.0011 °C	0.0007 °C - 0.0015 °C	0.0012 °C	0.0007 °C - 0.0019 °C	0.001 °C	0.0007 °C - 0.0014 °C	0.0007 °C	0.0002 °C - 0.0011 °C	0.0012 °C	0.0007 °C - 0.0017 °C
			Multiplication of preindustrial probability (-)	1.02	1.0 - >10'000	1.01	1.0 - 1.25	>10'000	2260.92 - >10'000	1.04	1.0 - >10'000	7.08	1.0 - >10'000	1.03	1.0 - >10'000	>10'000	1.02 - >10'000	1.04	1.0 - >10'000	5.37	1.01 - >10'000	1.0	1.0 - 1.01	1.0	1.0 - 1.0	>10'000	1.01 - >10'000	1.01	1.0 - 1.4	>10'000	1.14 - >10'000	1.0	1.0 - 1.07	345.16	1.01 - >10'000	>10'000	1.22 - >10'000	>10'000	1.0 - >10'000	1.75	1.01 - >10'000	1.44	1.0 - >10'000	>10'000	1.71 - >10'000	1.07	1.0 - >10'000	>10'000	1.3 - >10'000
	United Arab Emirates	Abu Dhabi National Oil Company	Contribution to intensity (°C)	0.0041 °C	0.0001 °C - 0.0085 °C	0.0041 °C	-0.0008 °C - 0.0088 °C	0.008 °C	0.0046 °C - 0.0109 °C	0.0044 °C	0.0026 °C - 0.006 °C	0.0035 °C	0.0014 °C - 0.0062 °C	0.0054 °C	0.0034 °C - 0.0072 °C	0.0063 °C	0.0033 °C - 0.009 °C	0.0045 °C	0.0032 °C - 0.0058 °C	0.0058 °C	0.0042 °C - 0.0077 °C	0.0051 °C	0.0028 °C - 0.0071 °C	0.0053 °C	0.0028 °C - 0.0075 °C	0.0066 °C	0.003 °C - 0.0092 °C	0.0063 °C	0.0042 °C - 0.0084 °C	0.0065 °C	0.0029 °C - 0.0087 °C	0.0069 °C	0.0031 °C - 0.0099 °C	0.0091 °C	0.0063 °C - 0.0127 °C	0.0095 °C	0.0061 °C - 0.0124 °C	0.0098 °C	0.0029 °C - 0.0159 °C	0.0088 °C	0.0057 °C - 0.0123 °C	0.0111 °C	0.0061 °C - 0.0169 °C	0.0098 °C	0.0068 °C - 0.0133 °C	0.0067 °C	0.0023 °C - 0.0108 °C	0.0131 °C	0.0079 °C - 0.0184 °C
			Multiplication of preindustrial probability (-)	1.14	1.0 - >10'000	1.04	1.0 - 2.91	>10'000	>10'000 - >10'000	1.27	1.01 - >10'000	40.99	1.01 - >10'000	1.21	1.02 - >10'000	>10'000	1.15 - >10'000	1.25	1.02 - >10'000	30.18	1.08 - >10'000	1.02	1.0 - 1.07	1.0	1.0 - 1.0	>10'000	1.04 - >10'000	1.06	1.01 - 3.82	>10'000	2.05 - >10'000	1.03	1.01 - 1.5	2720.4	1.08 - >10'000	>10'000	2.75 - >10'000	>10'000	1.03 - >10'000	7.22	1.05 - >10'000	4.96	1.03 - >10'000	>10'000	7.69 - >10'000	1.67	1.03 - >10'000	>10'000	4.36 - >10'000
North America	Canada	Canadian Natural Resources	Contribution to intensity (°C)	0.0004 °C	0.0 °C - 0.0009 °C	0.0005 °C	-0.0001 °C - 0.0011 °C	0.0012 °C	0.0007 °C - 0.0016 °C	0.0002 °C	0.0001 °C - 0.0002 °C	0.0002 °C	0.0001 °C - 0.0004 °C	0.0004 °C	0.0002 °C - 0.0005 °C	0.0008 °C	0.0004 °C - 0.0011 °C	0.0003 °C	0.0002 °C - 0.0003 °C	0.0005 °C	0.0004 °C - 0.0007 °C	0.0005 °C	0.0003 °C - 0.0007 °C	0.0005 °C	0.0003 °C - 0.0008 °C	0.0007 °C	0.0003 °C - 0.001 °C	0.0007 °C	0.0005 °C - 0.001 °C	0.0008 °C	0.0004 °C - 0.0011 °C	0.0009 °C	0.0004 °C - 0.0013 °C	0.0012 °C	0.0008 °C - 0.0017 °C	0.0013 °C	0.0008 °C - 0.0017 °C	0.0013 °C	0.0004 °C - 0.0021 °C	0.0012 °C	0.0008 °C - 0.0017 °C	0.0016 °C	0.0009 °C - 0.0025 °C	0.0015 °C	0.001 °C - 0.002 °C	0.001 °C	0.0003 °C - 0.0016 °C	0.0021 °C	0.0013 °C - 0.003 °C
			Multiplication of preindustrial probability (-)	1.01	1.0 - >10'000	1.01	1.0 - 1.25	>10'000	2983.18 - >10'000	1.01	1.0 - >10'000	3.3	1.0 - >10'000	1.01	1.0 - >10'000	>10'000	1.02 - >10'000	1.01	1.0 - >10'000	3.47	1.01 - >10'000	1.0	1.0 - 1.01	1.0	1.0 - 1.0	>10'000	1.0 - >10'000	1.01	1.0 - 1.32	>10'000	1.13 - >10'000	1.0	1.0 - 1.06	362.25	1.01 - >10'000	>10'000	1.23 - >10'000	>10'000	1.0 - >10'000	1.85	1.01 - >10'000	1.58	1.0 - >10'000	>10'000	2.01 - >10'000	1.1	1.0 - >10'000	>10'000	1.55 - >10'000
		Cenovus Energy	Contribution to intensity (°C)	0.0003 °C	0.0 °C - 0.0006 °C	0.0004 °C	-0.0001 °C - 0.0009 °C	0.0009 °C	0.0005 °C - 0.0012 °C	0.0002 °C	0.0001 °C - 0.0002 °C	0.0002 °C	0.0001 °C - 0.0003 °C	0.0003 °C	0.0002 °C - 0.0004 °C	0.0006 °C	0.0003 °C - 0.0008 °C	0.0002 °C	0.0002 °C - 0.0003 °C	0.0004 °C	0.0003 °C - 0.0005 °C	0.0003 °C	0.0002 °C - 0.0005 °C	0.0004 °C	0.0002 °C - 0.0005 °C	0.0005 °C	0.0002 °C - 0.0007 °C	0.0005 °C	0.0003 °C - 0.0007 °C	0.0006 °C	0.0003 °C - 0.0008 °C	0.0007 °C	0.0003 °C - 0.001 °C	0.0009 °C	0.0006 °C - 0.0013 °C	0.001 °C	0.0006 °C - 0.0013 °C	0.001 °C	0.0003 °C - 0.0016 °C	0.0009 °C	0.0006 °C - 0.0013 °C	0.0012 °C	0.0007 °C - 0.0019 °C	0.0011 °C	0.0008 °C - 0.0015 °C	0.0008 °C	0.0003 °C - 0.0012 °C	0.0016 °C	0.001 °C - 0.0022 °C
			Multiplication of preindustrial probability (-)	1.01	1.0 - >10'000	1.0	1.0 - 1.19	>10'000	2300.0 - >10'000	1.01	1.0 - >10'000	2.99	1.0 - >10'000	1.01	1.0 - >10'000	>10'000	1.01 - >10'000	1.01	1.0 - >10'000	2.85	1.01 - >10'000	1.0	1.0 - 1.0	1.0	1.0 - 1.0	>10'000	1.0 - >10'000	1.0	1.0 - 1.23	>10'000	1.1 - >10'000	1.0	1.0 - 1.05	278.18	1.01 - >10'000	>10'000	1.18 - >10'000	>10'000	1.0 - >10'000	1.66	1.01 - >10'000	1.45	1.0 - >10'000	>10'000	1.78 - >10'000	1.08	1.0 - >10'000	>10'000	1.41 - >10'000
		Obsidian Energy	Contribution to intensity (°C)	0.0001 °C	0.0 °C - 0.0002 °C	0.0001 °C	-0.0 °C - 0.0003 °C	0.0002 °C	0.0001 °C - 0.0003 °C	0.0 °C	0.0 °C - 0.0001 °C	0.0 °C	0.0 °C - 0.0001 °C	0.0001 °C	0.0001 °C - 0.0001 °C	0.0002 °C	0.0001 °C - 0.0003 °C	0.0001 °C	0.0 °C - 0.0001 °C	0.0001 °C	0.0001 °C - 0.0001 °C	0.0001 °C	0.0001 °C - 0.0001 °C	0.0001 °C	0.0001 °C - 0.0002 °C	0.0002 °C	0.0001 °C - 0.0002 °C	0.0002 °C	0.0001 °C - 0.0002 °C	0.0002 °C	0.0001 °C - 0.0003 °C	0.0002 °C	0.0001 °C - 0.0003 °C	0.0003 °C	0.0002 °C - 0.0004 °C	0.0003 °C	0.0002 °C - 0.0004 °C	0.0003 °C	0.0001 °C - 0.0005 °C	0.0003 °C	0.0002 °C - 0.0004 °C	0.0003 °C	0.0002 °C - 0.0005 °C	0.0003 °C	0.0002 °C - 0.0004 °C	0.0002 °C	0.0001 °C - 0.0003 °C	0.0003 °C	0.0002 °C - 0.0005 °C
			Multiplication of preindustrial probability (-)	1.0	1.0 - >10'000	1.0	1.0 - 1.06	>10'000	618.8 - >10'000	1.0	1.0 - >10'000	1.53	1.0 - >10'000	1.0	1.0 - >10'000	>10'000	1.0 - >10'000	1.0	1.0 - >10'000	1.56	1.0 - >10'000	1.0	1.0 - 1.0	1.0	1.0 - 1.0	>10'000	1.0 - >10'000	1.0	1.0 - 1.07	>10'000	1.03 - >10'000	1.0	1.0 - 1.02	86.21	1.0 - >10'000	>10'000	1.06 - >10'000	>10'000	1.0 - >10'000	1.19	1.0 - >10'000	1.12	1.0 - >10'000	>10'000	1.2 - >10'000	1.02	1.0 - >10'000	>10'000	1.09 - >10'000
		Ovintiv	Contribution to intensity (°C)	0.001 °C	0.0 °C - 0.002 °C	0.001 °C	-0.0002 °C - 0.0022 °C	0.0019 °C	0.0011 °C - 0.0026 °C	0.0007 °C	0.0004 °C - 0.0009 °C	0.0006 °C	0.0003 °C - 0.0011 °C	0.001 °C	0.0007 °C - 0.0014 °C	0.0016 °C	0.0008 °C - 0.0023 °C	0.0008 °C	0.0006 °C - 0.0011 °C	0.0012 °C	0.0009 °C - 0.0017 °C	0.0012 °C	0.0006 °C - 0.0016 °C	0.0013 °C	0.0007 °C - 0.0018 °C	0.0016 °C	0.0007 °C - 0.0022 °C	0.0016 °C	0.001 °C - 0.0021 °C	0.0016 °C	0.0007 °C - 0.0022 °C	0.0017 °C	0.0008 °C - 0.0025 °C	0.0023 °C	0.0016 °C - 0.0032 °C	0.0024 °C	0.0015 °C - 0.0031 °C	0.0024 °C	0.0007 °C - 0.004 °C	0.0022 °C	0.0014 °C - 0.003 °C	0.0026 °C	0.0014 °C - 0.004 °C	0.0022 °C	0.0015 °C - 0.0031 °C	0.0015 °C	0.0005 °C - 0.0025 °C	0.0027 °C	0.0016 °C - 0.0038 °C
			Multiplication of preindustrial probability (-)	1.03	1.0 - >10'000	1.01	1.0 - 1.48	>10'000	4830.59 - >10'000	1.04	1.0 - >10'000	8.21	1.0 - >10'000	1.04	1.0 - >10'000	>10'000	1.04 - >10'000	1.05	1.0 - >10'000	7.31	1.02 - >10'000	1.0	1.0 - 1.02	1.0	1.0 - 1.0	>10'000	1.01 - >10'000	1.01	1.0 - 1.69	>10'000	1.27 - >10'000	1.01	1.0 - 1.12	681.23	1.02 - >10'000	>10'000	1.44 - >10'000	>10'000	1.01 - >10'000	2.53	1.01 - >10'000	1.94	1.01 - >10'000	>10'000	2.54 - >10'000	1.15	1.01 - >10'000	>10'000	1.7 - >10'000
		Suncor Energy	Contribution to intensity (°C)	0.0007 °C	0.0 °C - 0.0014 °C	0.0008 °C	-0.0001 °C - 0.0017 °C	0.0015 °C	0.0009 °C - 0.0021 °C	0.0005 °C	0.0003 °C - 0.0007 °C	0.0004 °C	0.0002 °C - 0.0008 °C	0.0007 °C	0.0005 °C - 0.001 °C	0.0012 °C	0.0006 °C - 0.0017 °C	0.0006 °C	0.0004 °C - 0.0007 °C	0.0009 °C	0.0006 °C - 0.0012 °C	0.0008 °C	0.0004 °C - 0.0011 °C	0.0009 °C	0.0005 °C - 0.0012 °C	0.0011 °C	0.0005 °C - 0.0016 °C	0.0011 °C	0.0007 °C - 0.0015 °C	0.0012 °C	0.0005 °C - 0.0016 °C	0.0013 °C	0.0006 °C - 0.0019 °C	0.0017 °C	0.0012 °C - 0.0024 °C	0.0018 °C	0.0012 °C - 0.0024 °C	0.0019 °C	0.0006 °C - 0.003 °C	0.0017 °C	0.0011 °C - 0.0024 °C	0.0022 °C	0.0012 °C - 0.0033 °C	0.0019 °C	0.0013 °C - 0.0026 °C	0.0013 °C	0.0004 °C - 0.0021 °C	0.0024 °C	0.0014 °C - 0.0034 °C
			Multiplication of preindustrial probability (-)	1.02	1.0 - >10'000	1.01	1.0 - 1.36	>10'000	3971.58 - >10'000	1.03	1.0 - >10'000	6.12	1.0 - >10'000	1.03	1.0 - >10'000	>10'000	1.03 - >10'000	1.03	1.0 - >10'000	5.41	1.01 - >10'000	1.0	1.0 - 1.01	1.0	1.0 - 1.0	>10'000	1.01 - >10'000	1.01	1.0 - 1.49	>10'000	1.2 - >10'000	1.01	1.0 - 1.09	521.53	1.02 - >10'000	>10'000	1.34 - >10'000	>10'000	1.01 - >10'000	2.21	1.01 - >10'000	1.77	1.01 - >10'000	>10'000	2.29 - >10'000	1.13	1.01 - >10'000	>10'000	1.62 - >10'000
		Teck Resources	Contribution to intensity (°C)	0.0001 °C	0.0 °C - 0.0003 °C	0.0002 °C	-0.0 °C - 0.0005 °C	0.0006 °C	0.0004 °C - 0.0008 °C	0.0 °C	0.0 °C - 0.0 °C	0.0001 °C	0.0 °C - 0.0001 °C	0.0001 °C	0.0001 °C - 0.0001 °C	0.0003 °C	0.0002 °C - 0.0005 °C	0.0001 °C	0.0 °C - 0.0001 °C	0.0001 °C	0.0001 °C - 0.0002 °C	0.0001 °C	0.0001 °C - 0.0002 °C	0.0002 °C	0.0001 °C - 0.0002 °C	0.0002 °C	0.0001 °C - 0.0003 °C	0.0003 °C	0.0002 °C - 0.0004 °C	0.0003 °C	0.0002 °C - 0.0005 °C	0.0004 °C	0.0002 °C - 0.0006 °C	0.0006 °C	0.0004 °C - 0.0008 °C	0.0006 °C	0.0004 °C - 0.0008 °C	0.0006 °C	0.0002 °C - 0.001 °C	0.0006 °C	0.0004 °C - 0.0008 °C	0.0008 °C	0.0005 °C - 0.0013 °C	0.0008 °C	0.0005 °C - 0.0011 °C	0.0005 °C	0.0002 °C - 0.0009 °C	0.0011 °C	0.0007 °C - 0.0016 °C
			Multiplication of preindustrial probability (-)	1.0	1.0 - >10'000	1.0	1.0 - 1.11	>10'000	1558.36 - >10'000	1.0	1.0 - >10'000	1.6	1.0 - >10'000	1.0	1.0 - >10'000	>10'000	1.01 - >10'000	1.0	1.0 - >10'000	1.76	1.0 - >10'000	1.0	1.0 - 1.0	1.0	1.0 - 1.0	>10'000	1.0 - >10'000	1.0	1.0 - 1.12	>10'000	1.06 - >10'000	1.0	1.0 - 1.03	172.91	1.01 - >10'000	>10'000	1.11 - >10'000	>10'000	1.0 - >10'000	1.42	1.0 - >10'000	1.3	1.0 - >10'000	>10'000	1.53 - >10'000	1.05	1.0 - >10'000	>10'000	1.29 - >10'000
		Tourmaline Oil	Contribution to intensity (°C)	0.0 °C	0.0 °C - 0.0 °C	0.0 °C	-0.0 °C - 0.0 °C	0.0001 °C	0.0001 °C - 0.0001 °C	0.0 °C	0.0 °C - 0.0 °C	0.0 °C	0.0 °C - 0.0 °C	0.0 °C	0.0 °C - 0.0 °C	0.0 °C	0.0 °C - 0.0 °C	0.0 °C	0.0 °C - 0.0 °C	0.0 °C	0.0 °C - 0.0 °C	0.0 °C	0.0 °C - 0.0 °C	0.0 °C	0.0 °C - 0.0 °C	0.0 °C	0.0 °C - 0.0 °C	0.0 °C	0.0 °C - 0.0 °C	0.0 °C	0.0 °C - 0.0 °C	0.0 °C	0.0 °C - 0.0 °C	0.0 °C	0.0 °C - 0.0001 °C	0.0 °C	0.0 °C - 0.0001 °C	0.0 °C	0.0 °C - 0.0001 °C	0.0001 °C	0.0 °C - 0.0001 °C	0.0001 °C	0.0001 °C - 0.0002 °C	0.0001 °C	0.0001 °C - 0.0002 °C	0.0001 °C	0.0 °C - 0.0002 °C	0.0004 °C	0.0002 °C - 0.0005 °C
			Multiplication of preindustrial probability (-)	1.0	1.0 - >10'000	1.0	1.0 - 1.0	>10'000	246.1 - >10'000	1.0	1.0 - 1.0	1.0	1.0 - 1.0	1.0	1.0 - 1.0	>10'000	1.0 - >10'000	1.0	1.0 - 1.0	1.0	1.0 - 1.0	1.0	1.0 - 1.0	1.0	1.0 - 1.0	>10'000	1.0 - >10'000	1.0	1.0 - 1.0	>10'000	1.0 - >10'000	1.0	1.0 - 1.0	12.06	1.0 - >10'000	>10'000	1.01 - >10'000	>10'000	1.0 - >10'000	1.04	1.0 - >10'000	1.05	1.0 - >10'000	>10'000	1.1 - >10'000	1.01	1.0 - >10'000	>10'000	1.09 - >10'000
	USA	APA Corporation	Contribution to intensity (°C)	0.0004 °C	0.0 °C - 0.0009 °C	0.0006 °C	-0.0001 °C - 0.0012 °C	0.0011 °C	0.0007 °C - 0.0016 °C	0.0002 °C	0.0001 °C - 0.0003 °C	0.0002 °C	0.0001 °C - 0.0004 °C	0.0004 °C	0.0002 °C - 0.0005 °C	0.0008 °C	0.0004 °C - 0.0012 °C	0.0003 °C	0.0002 °C - 0.0004 °C	0.0005 °C	0.0004 °C - 0.0007 °C	0.0005 °C	0.0003 °C - 0.0007 °C	0.0005 °C	0.0003 °C - 0.0008 °C	0.0007 °C	0.0003 °C - 0.001 °C	0.0007 °C	0.0005 °C - 0.001 °C	0.0008 °C	0.0004 °C - 0.0011 °C	0.0009 °C	0.0004 °C - 0.0013 °C	0.0013 °C	0.0009 °C - 0.0018 °C	0.0013 °C	0.0008 °C - 0.0017 °C	0.0014 °C	0.0004 °C - 0.0022 °C	0.0013 °C	0.0008 °C - 0.0018 °C	0.0016 °C	0.0009 °C - 0.0024 °C	0.0014 °C	0.001 °C - 0.0019 °C	0.001 °C	0.0003 °C - 0.0015 °C	0.0018 °C	0.0011 °C - 0.0025 °C
			Multiplication of preindustrial probability (-)	1.01	1.0 - >10'000	1.01	1.0 - 1.26	>10'000	2934.84 - >10'000	1.01	1.0 - >10'000	3.62	1.0 - >10'000	1.02	1.0 - >10'000	>10'000	1.02 - >10'000	1.02	1.0 - >10'000	3.52	1.01 - >10'000	1.0	1.0 - 1.01	1.0	1.0 - 1.0	>10'000	1.0 - >10'000	1.01	1.0 - 1.32	>10'000	1.14 - >10'000	1.0	1.0 - 1.07	380.63	1.01 - >10'000	>10'000	1.24 - >10'000	>10'000	1.0 - >10'000	1.88	1.01 - >10'000	1.57	1.0 - >10'000	>10'000	1.96 - >10'000	1.1	1.0 - >10'000	>10'000	1.46 - >10'000
		Alliance Resource Partners	Contribution to intensity (°C)	0.0003 °C	0.0 °C - 0.0006 °C	0.0004 °C	-0.0001 °C - 0.0008 °C	0.0009 °C	0.0005 °C - 0.0012 °C	0.0001 °C	0.0001 °C - 0.0002 °C	0.0001 °C	0.0001 °C - 0.0002 °C	0.0002 °C	0.0002 °C - 0.0003 °C	0.0006 °C	0.0003 °C - 0.0008 °C	0.0002 °C	0.0001 °C - 0.0002 °C	0.0003 °C	0.0002 °C - 0.0004 °C	0.0003 °C	0.0002 °C - 0.0004 °C	0.0004 °C	0.0002 °C - 0.0005 °C	0.0005 °C	0.0002 °C - 0.0007 °C	0.0005 °C	0.0003 °C - 0.0007 °C	0.0006 °C	0.0003 °C - 0.0008 °C	0.0006 °C	0.0003 °C - 0.0009 °C	0.0009 °C	0.0006 °C - 0.0012 °C	0.0009 °C	0.0006 °C - 0.0012 °C	0.001 °C	0.0003 °C - 0.0015 °C	0.0009 °C	0.0006 °C - 0.0013 °C	0.0012 °C	0.0007 °C - 0.0019 °C	0.0011 °C	0.0008 °C - 0.0015 °C	0.0008 °C	0.0003 °C - 0.0012 °C	0.0015 °C	0.0009 °C - 0.0021 °C
			Multiplication of preindustrial probability (-)	1.01	1.0 - >10'000	1.0	1.0 - 1.18	>10'000	2238.32 - >10'000	1.01	1.0 - >10'000	2.61	1.0 - >10'000	1.01	1.0 - >10'000	>10'000	1.01 - >10'000	1.01	1.0 - >10'000	2.68	1.0 - >10'000	1.0	1.0 - 1.0	1.0	1.0 - 1.0	>10'000	1.0 - >10'000	1.0	1.0 - 1.22	>10'000	1.09 - >10'000	1.0	1.0 - 1.05	266.26	1.01 - >10'000	>10'000	1.17 - >10'000	>10'000	1.0 - >10'000	1.63	1.0 - >10'000	1.43	1.0 - >10'000	>10'000	1.75 - >10'000	1.07	1.0 - >10'000	>10'000	1.39 - >10'000
		Alpha Metallurgical Resources	Contribution to intensity (°C)	0.002 °C	0.0001 °C - 0.0041 °C	0.0022 °C	-0.0004 °C - 0.0047 °C	0.0039 °C	0.0023 °C - 0.0054 °C	0.0012 °C	0.0007 °C - 0.0017 °C	0.0012 °C	0.0005 °C - 0.0022 °C	0.002 °C	0.0013 °C - 0.0027 °C	0.0034 °C	0.0018 °C - 0.0048 °C	0.0016 °C	0.0011 °C - 0.002 °C	0.0025 °C	0.0018 °C - 0.0034 °C	0.0024 °C	0.0013 °C - 0.0033 °C	0.0026 °C	0.0013 °C - 0.0036 °C	0.0033 °C	0.0015 °C - 0.0046 °C	0.0033 °C	0.0022 °C - 0.0044 °C	0.0035 °C	0.0015 °C - 0.0047 °C	0.0037 °C	0.0017 °C - 0.0053 °C	0.0048 °C	0.0034 °C - 0.0068 °C	0.0051 °C	0.0032 °C - 0.0067 °C	0.0052 °C	0.0016 °C - 0.0085 °C	0.0046 °C	0.003 °C - 0.0065 °C	0.0055 °C	0.003 °C - 0.0083 °C	0.0046 °C	0.0032 °C - 0.0063 °C	0.0032 °C	0.0011 °C - 0.0051 °C	0.0053 °C	0.0031 °C - 0.0074 °C
			Multiplication of preindustrial probability (-)	1.07	1.0 - >10'000	1.02	1.0 - 2.03	>10'000	>10'000 - >10'000	1.08	1.0 - >10'000	14.93	1.0 - >10'000	1.08	1.01 - >10'000	>10'000	1.08 - >10'000	1.09	1.01 - >10'000	13.75	1.03 - >10'000	1.01	1.0 - 1.03	1.0	1.0 - 1.0	>10'000	1.02 - >10'000	1.03	1.01 - 2.46	>10'000	1.57 - >10'000	1.02	1.0 - 1.27	1454.87	1.04 - >10'000	>10'000	1.94 - >10'000	>10'000	1.02 - >10'000	4.27	1.03 - >10'000	2.95	1.02 - >10'000	>10'000	4.15 - >10'000	1.31	1.01 - >10'000	>10'000	2.35 - >10'000
		American Consolidated Natural Resources	Contribution to intensity (°C)	0.0003 °C	0.0 °C - 0.0007 °C	0.0004 °C	-0.0001 °C - 0.0009 °C	0.001 °C	0.0006 °C - 0.0014 °C	0.0002 °C	0.0001 °C - 0.0003 °C	0.0002 °C	0.0001 °C - 0.0004 °C	0.0004 °C	0.0002 °C - 0.0005 °C	0.0006 °C	0.0003 °C - 0.0009 °C	0.0003 °C	0.0002 °C - 0.0004 °C	0.0004 °C	0.0003 °C - 0.0006 °C	0.0004 °C	0.0002 °C - 0.0006 °C	0.0004 °C	0.0002 °C - 0.0006 °C	0.0006 °C	0.0003 °C - 0.0008 °C	0.0006 °C	0.0004 °C - 0.0008 °C	0.0006 °C	0.0003 °C - 0.0008 °C	0.0007 °C	0.0003 °C - 0.001 °C	0.001 °C	0.0007 °C - 0.0014 °C	0.0011 °C	0.0007 °C - 0.0014 °C	0.0011 °C	0.0003 °C - 0.0018 °C	0.001 °C	0.0007 °C - 0.0015 °C	0.0014 °C	0.0008 °C - 0.0022 °C	0.0013 °C	0.0009 °C - 0.0018 °C	0.0009 °C	0.0003 °C - 0.0014 °C	0.0019 °C	0.0011 °C - 0.0026 °C
			Multiplication of preindustrial probability (-)	1.01	1.0 - >10'000	1.0	1.0 - 1.2	>10'000	2645.11 - >10'000	1.01	1.0 - >10'000	3.49	1.0 - >10'000	1.01	1.0 - >10'000	>10'000	1.01 - >10'000	1.02	1.0 - >10'000	3.19	1.01 - >10'000	1.0	1.0 - 1.01	1.0	1.0 - 1.0	>10'000	1.0 - >10'000	1.0	1.0 - 1.25	>10'000	1.1 - >10'000	1.0	1.0 - 1.05	301.64	1.01 - >10'000	>10'000	1.19 - >10'000	>10'000	1.0 - >10'000	1.73	1.01 - >10'000	1.51	1.0 - >10'000	>10'000	1.9 - >10'000	1.09	1.0 - >10'000	>10'000	1.48 - >10'000
		Antero	Contribution to intensity (°C)	0.0 °C	0.0 °C - 0.0 °C	0.0 °C	-0.0 °C - 0.0 °C	0.0001 °C	0.0001 °C - 0.0002 °C	0.0 °C	0.0 °C - 0.0 °C	0.0 °C	0.0 °C - 0.0 °C	0.0 °C	0.0 °C - 0.0 °C	0.0 °C	0.0 °C - 0.0 °C	0.0 °C	0.0 °C - 0.0 °C	0.0 °C	0.0 °C - 0.0 °C	0.0 °C	0.0 °C - 0.0 °C	0.0 °C	0.0 °C - 0.0 °C	0.0 °C	0.0 °C - 0.0 °C	0.0 °C	0.0 °C - 0.0 °C	0.0 °C	0.0 °C - 0.0 °C	0.0 °C	0.0 °C - 0.0 °C	0.0 °C	0.0 °C - 0.0 °C	0.0 °C	0.0 °C - 0.0 °C	0.0 °C	0.0 °C - 0.0001 °C	0.0001 °C	0.0 °C - 0.0001 °C	0.0002 °C	0.0001 °C - 0.0002 °C	0.0002 °C	0.0001 °C - 0.0003 °C	0.0001 °C	0.0 °C - 0.0002 °C	0.0005 °C	0.0003 °C - 0.0007 °C
			Multiplication of preindustrial probability (-)	1.0	1.0 - 1.0	1.0	1.0 - 1.0	>10'000	293.11 - >10'000	1.0	1.0 - 1.0	1.0	1.0 - 1.0	1.0	1.0 - 1.0	>10'000	1.0 - >10'000	1.0	1.0 - 1.0	1.0	1.0 - 1.0	1.0	1.0 - 1.0	1.0	1.0 - 1.0	1.0	1.0 - 1.0	1.0	1.0 - 1.0	>10'000	1.0 - >10'000	1.0	1.0 - 1.0	10.01	1.0 - >10'000	>10'000	1.01 - >10'000	>10'000	1.0 - >10'000	1.04	1.0 - >10'000	1.06	1.0 - >10'000	>10'000	1.13 - >10'000	1.01	1.0 - >10'000	>10'000	1.13 - >10'000
		Arch Resources	Contribution to intensity (°C)	0.0024 °C	0.0001 °C - 0.005 °C	0.0024 °C	-0.0005 °C - 0.0052 °C	0.0045 °C	0.0026 °C - 0.0061 °C	0.0022 °C	0.0013 °C - 0.003 °C	0.0019 °C	0.0008 °C - 0.0033 °C	0.003 °C	0.0019 °C - 0.004 °C	0.0038 °C	0.002 °C - 0.0054 °C	0.0024 °C	0.0017 °C - 0.0031 °C	0.0033 °C	0.0024 °C - 0.0044 °C	0.003 °C	0.0016 °C - 0.0041 °C	0.0031 °C	0.0016 °C - 0.0044 °C	0.0039 °C	0.0018 °C - 0.0054 °C	0.0037 °C	0.0025 °C - 0.005 °C	0.0039 °C	0.0017 °C - 0.0052 °C	0.0041 °C	0.0018 °C - 0.0059 °C	0.0053 °C	0.0037 °C - 0.0075 °C	0.0056 °C	0.0036 °C - 0.0073 °C	0.0058 °C	0.0017 °C - 0.0093 °C	0.0051 °C	0.0033 °C - 0.0072 °C	0.0062 °C	0.0034 °C - 0.0095 °C	0.0053 °C	0.0037 °C - 0.0073 °C	0.0037 °C	0.0013 °C - 0.0059 °C	0.0065 °C	0.0039 °C - 0.0091 °C
			Multiplication of preindustrial probability (-)	1.08	1.0 - >10'000	1.02	1.0 - 2.13	>10'000	>10'000 - >10'000	1.13	1.01 - >10'000	22.53	1.0 - >10'000	1.12	1.01 - >10'000	>10'000	1.09 - >10'000	1.14	1.01 - >10'000	17.78	1.05 - >10'000	1.01	1.0 - 1.04	1.0	1.0 - 1.0	>10'000	1.02 - >10'000	1.03	1.01 - 2.67	>10'000	1.63 - >10'000	1.02	1.0 - 1.29	1599.61	1.05 - >10'000	>10'000	2.03 - >10'000	>10'000	1.02 - >10'000	4.61	1.03 - >10'000	3.22	1.02 - >10'000	>10'000	4.66 - >10'000	1.36	1.02 - >10'000	>10'000	2.66 - >10'000
		CNX Resources	Contribution to intensity (°C)	0.0 °C	0.0 °C - 0.0 °C	0.0 °C	0.0 °C - 0.0 °C	0.0 °C	0.0 °C - 0.0 °C	0.0 °C	0.0 °C - 0.0 °C	0.0 °C	0.0 °C - 0.0 °C	0.0 °C	0.0 °C - 0.0 °C	0.0 °C	0.0 °C - 0.0 °C	0.0 °C	0.0 °C - 0.0 °C	0.0 °C	0.0 °C - 0.0 °C	0.0 °C	0.0 °C - 0.0 °C	0.0 °C	0.0 °C - 0.0 °C	0.0 °C	0.0 °C - 0.0 °C	0.0 °C	0.0 °C - 0.0 °C	0.0 °C	0.0 °C - 0.0 °C	0.0 °C	0.0 °C - 0.0 °C	0.0 °C	0.0 °C - 0.0 °C	0.0 °C	0.0 °C - 0.0 °C	0.0 °C	0.0 °C - 0.0 °C	0.0 °C	0.0 °C - 0.0 °C	0.0 °C	0.0 °C - 0.0 °C	0.0 °C	0.0 °C - 0.0 °C	0.0 °C	0.0 °C - 0.0 °C	0.0002 °C	0.0001 °C - 0.0002 °C
			Multiplication of preindustrial probability (-)	1.0	1.0 - 1.0	1.0	1.0 - 1.0	>10'000	30.98 - >10'000	1.0	1.0 - 1.0	1.0	1.0 - 1.0	1.0	1.0 - 1.0	1.0	1.0 - 1.0	1.0	1.0 - 1.0	1.0	1.0 - 1.0	1.0	1.0 - 1.0	1.0	1.0 - 1.0	1.0	1.0 - 1.0	1.0	1.0 - 1.0	1.0	1.0 - 1.0	1.0	1.0 - 1.0	1.0	1.0 - 1.0	1.0	1.0 - 1.0	1.0	1.0 - 1.0	1.0	1.0 - 1.0	1.01	1.0 - >10'000	>10'000	1.02 - >10'000	1.0	1.0 - >10'000	>10'000	1.04 - >10'000
		CONSOL Energy	Contribution to intensity (°C)	0.0036 °C	0.0001 °C - 0.0075 °C	0.0031 °C	-0.0006 °C - 0.0065 °C	0.0051 °C	0.003 °C - 0.0069 °C	0.0048 °C	0.0028 °C - 0.0065 °C	0.0036 °C	0.0015 °C - 0.0063 °C	0.0053 °C	0.0034 °C - 0.0071 °C	0.0049 °C	0.0025 °C - 0.007 °C	0.0046 °C	0.0033 °C - 0.006 °C	0.0054 °C	0.0039 °C - 0.0071 °C	0.0046 °C	0.0025 °C - 0.0064 °C	0.0047 °C	0.0024 °C - 0.0066 °C	0.0056 °C	0.0026 °C - 0.0079 °C	0.0052 °C	0.0034 °C - 0.0069 °C	0.005 °C	0.0022 °C - 0.0067 °C	0.0051 °C	0.0023 °C - 0.0074 °C	0.0065 °C	0.0045 °C - 0.0091 °C	0.0068 °C	0.0043 °C - 0.0089 °C	0.007 °C	0.0021 °C - 0.0114 °C	0.0061 °C	0.0039 °C - 0.0085 °C	0.0071 °C	0.0039 °C - 0.0108 °C	0.006 °C	0.0041 °C - 0.0082 °C	0.0041 °C	0.0014 °C - 0.0066 °C	0.007 °C	0.0042 °C - 0.0098 °C
			Multiplication of preindustrial probability (-)	1.12	1.0 - >10'000	1.03	1.0 - 2.42	>10'000	>10'000 - >10'000	1.29	1.01 - >10'000	41.87	1.01 - >10'000	1.21	1.02 - >10'000	>10'000	1.11 - >10'000	1.26	1.02 - >10'000	28.15	1.07 - >10'000	1.01	1.0 - 1.06	1.0	1.0 - 1.0	>10'000	1.03 - >10'000	1.05	1.01 - 3.33	>10'000	1.82 - >10'000	1.02	1.01 - 1.37	1948.74	1.06 - >10'000	>10'000	2.25 - >10'000	>10'000	1.02 - >10'000	5.29	1.03 - >10'000	3.53	1.02 - >10'000	>10'000	5.1 - >10'000	1.41	1.02 - >10'000	>10'000	2.8 - >10'000
		Chesapeake Energy	Contribution to intensity (°C)	0.0002 °C	0.0 °C - 0.0003 °C	0.0003 °C	-0.0001 °C - 0.0007 °C	0.0009 °C	0.0005 °C - 0.0012 °C	0.0 °C	0.0 °C - 0.0001 °C	0.0 °C	0.0 °C - 0.0001 °C	0.0001 °C	0.0001 °C - 0.0001 °C	0.0005 °C	0.0002 °C - 0.0006 °C	0.0001 °C	0.0 °C - 0.0001 °C	0.0002 °C	0.0001 °C - 0.0002 °C	0.0002 °C	0.0001 °C - 0.0002 °C	0.0002 °C	0.0001 °C - 0.0003 °C	0.0003 °C	0.0001 °C - 0.0004 °C	0.0003 °C	0.0002 °C - 0.0005 °C	0.0005 °C	0.0002 °C - 0.0006 °C	0.0006 °C	0.0002 °C - 0.0008 °C	0.0008 °C	0.0006 °C - 0.0011 °C	0.0008 °C	0.0005 °C - 0.0011 °C	0.0009 °C	0.0003 °C - 0.0014 °C	0.0009 °C	0.0006 °C - 0.0012 °C	0.0012 °C	0.0007 °C - 0.0019 °C	0.0011 °C	0.0008 °C - 0.0015 °C	0.0008 °C	0.0003 °C - 0.0012 °C	0.0016 °C	0.001 °C - 0.0022 °C
			Multiplication of preindustrial probability (-)	1.01	1.0 - >10'000	1.0	1.0 - 1.15	>10'000	2242.24 - >10'000	1.0	1.0 - >10'000	1.56	1.0 - >10'000	1.0	1.0 - >10'000	>10'000	1.01 - >10'000	1.0	1.0 - >10'000	1.77	1.0 - >10'000	1.0	1.0 - 1.0	1.0	1.0 - 1.0	>10'000	1.0 - >10'000	1.0	1.0 - 1.15	>10'000	1.08 - >10'000	1.0	1.0 - 1.04	242.92	1.01 - >10'000	>10'000	1.16 - >10'000	>10'000	1.0 - >10'000	1.6	1.0 - >10'000	1.43	1.0 - >10'000	>10'000	1.76 - >10'000	1.08	1.0 - >10'000	>10'000	1.41 - >10'000
		Chevron	Contribution to intensity (°C)	0.0191 °C	0.0007 °C - 0.0392 °C	0.0156 °C	-0.0029 °C - 0.0333 °C	0.0258 °C	0.0151 °C - 0.0353 °C	0.0279 °C	0.0163 °C - 0.0382 °C	0.0202 °C	0.0083 °C - 0.0359 °C	0.0297 °C	0.0191 °C - 0.0398 °C	0.0248 °C	0.0129 °C - 0.0355 °C	0.0259 °C	0.0184 °C - 0.0338 °C	0.029 °C	0.0213 °C - 0.0387 °C	0.0245 °C	0.0133 °C - 0.0341 °C	0.0245 °C	0.0127 °C - 0.0345 °C	0.0292 °C	0.0134 °C - 0.0408 °C	0.0268 °C	0.0177 °C - 0.0357 °C	0.0255 °C	0.0113 °C - 0.0342 °C	0.026 °C	0.0117 °C - 0.0374 °C	0.0329 °C	0.023 °C - 0.0462 °C	0.0345 °C	0.022 °C - 0.0453 °C	0.0356 °C	0.0106 °C - 0.0576 °C	0.0308 °C	0.0198 °C - 0.0432 °C	0.036 °C	0.0198 °C - 0.055 °C	0.0305 °C	0.0211 °C - 0.0417 °C	0.0211 °C	0.0072 °C - 0.0337 °C	0.0367 °C	0.0219 °C - 0.0514 °C
			Multiplication of preindustrial probability (-)	1.63	1.01 - >10'000	1.16	1.02 - 8.23	>10'000	>10'000 - >10'000	2.7	1.08 - >10'000	232.13	1.04 - >10'000	2.15	1.09 - >10'000	>10'000	1.57 - >10'000	2.46	1.11 - >10'000	147.83	1.4 - >10'000	1.08	1.02 - 1.34	1.01	1.0 - 1.01	>10'000	1.18 - >10'000	1.24	1.04 - 13.06	>10'000	5.07 - >10'000	1.11	1.03 - 2.88	9889.15	1.29 - >10'000	>10'000	7.29 - >10'000	>10'000	1.12 - >10'000	22.78	1.17 - >10'000	13.83	1.11 - >10'000	>10'000	21.62 - >10'000	3.09	1.09 - >10'000	>10'000	10.25 - >10'000
		Cloud Peak	Contribution to intensity (°C)	0.0 °C	0.0 °C - 0.0 °C	0.0003 °C	-0.0001 °C - 0.0006 °C	0.0009 °C	0.0005 °C - 0.0012 °C	0.0 °C	0.0 °C - 0.0 °C	0.0 °C	0.0 °C - 0.0 °C	0.0 °C	0.0 °C - 0.0 °C	0.0003 °C	0.0002 °C - 0.0005 °C	0.0 °C	0.0 °C - 0.0 °C	0.0 °C	0.0 °C - 0.0 °C	0.0 °C	0.0 °C - 0.0 °C	0.0 °C	0.0 °C - 0.0 °C	0.0001 °C	0.0 °C - 0.0001 °C	0.0001 °C	0.0001 °C - 0.0002 °C	0.0003 °C	0.0002 °C - 0.0005 °C	0.0005 °C	0.0002 °C - 0.0007 °C	0.0008 °C	0.0005 °C - 0.0011 °C	0.0008 °C	0.0005 °C - 0.001 °C	0.0008 °C	0.0002 °C - 0.0013 °C	0.0008 °C	0.0005 °C - 0.0012 °C	0.0012 °C	0.0007 °C - 0.0019 °C	0.0011 °C	0.0008 °C - 0.0016 °C	0.0008 °C	0.0003 °C - 0.0013 °C	0.0015 °C	0.0009 °C - 0.0021 °C
			Multiplication of preindustrial probability (-)	1.0	1.0 - >10'000	1.0	1.0 - 1.13	>10'000	2304.02 - >10'000	1.0	1.0 - 1.0	1.0	1.0 - 1.0	1.0	1.0 - 1.0	>10'000	1.01 - >10'000	1.0	1.0 - 1.0	1.0	1.0 - 1.0	1.0	1.0 - 1.0	1.0	1.0 - 1.0	>10'000	1.0 - >10'000	1.0	1.0 - 1.06	>10'000	1.06 - >10'000	1.0	1.0 - 1.03	227.97	1.01 - >10'000	>10'000	1.15 - >10'000	>10'000	1.0 - >10'000	1.59	1.0 - >10'000	1.45	1.0 - >10'000	>10'000	1.79 - >10'000	1.08	1.0 - >10'000	>10'000	1.38 - >10'000
		ConocoPhillips	Contribution to intensity (°C)	0.0067 °C	0.0002 °C - 0.0138 °C	0.0058 °C	-0.0011 °C - 0.0124 °C	0.0098 °C	0.0057 °C - 0.0134 °C	0.0089 °C	0.0052 °C - 0.0122 °C	0.0066 °C	0.0027 °C - 0.0118 °C	0.0099 °C	0.0063 °C - 0.0132 °C	0.0092 °C	0.0048 °C - 0.0131 °C	0.0085 °C	0.006 °C - 0.0111 °C	0.0099 °C	0.0073 °C - 0.0132 °C	0.0085 °C	0.0046 °C - 0.0119 °C	0.0086 °C	0.0045 °C - 0.0122 °C	0.0105 °C	0.0048 °C - 0.0146 °C	0.0097 °C	0.0064 °C - 0.0129 °C	0.0094 °C	0.0042 °C - 0.0126 °C	0.0097 °C	0.0044 °C - 0.0139 °C	0.0123 °C	0.0086 °C - 0.0173 °C	0.0129 °C	0.0082 °C - 0.0169 °C	0.0133 °C	0.004 °C - 0.0215 °C	0.0116 °C	0.0075 °C - 0.0162 °C	0.0136 °C	0.0075 °C - 0.0208 °C	0.0115 °C	0.008 °C - 0.0158 °C	0.008 °C	0.0027 °C - 0.0128 °C	0.0139 °C	0.0083 °C - 0.0195 °C
			Multiplication of preindustrial probability (-)	1.23	1.01 - >10'000	1.06	1.01 - 3.69	>10'000	>10'000 - >10'000	1.54	1.02 - >10'000	76.87	1.01 - >10'000	1.38	1.03 - >10'000	>10'000	1.21 - >10'000	1.48	1.04 - >10'000	51.31	1.14 - >10'000	1.03	1.01 - 1.12	1.0	1.0 - 1.0	>10'000	1.06 - >10'000	1.09	1.02 - 5.35	>10'000	2.53 - >10'000	1.04	1.01 - 1.7	3698.33	1.11 - >10'000	>10'000	3.37 - >10'000	>10'000	1.04 - >10'000	9.18	1.06 - >10'000	5.87	1.04 - >10'000	>10'000	8.91 - >10'000	1.79	1.04 - >10'000	>10'000	4.55 - >10'000
		Continental Resources	Contribution to intensity (°C)	0.0 °C	0.0 °C - 0.0 °C	0.0 °C	-0.0 °C - 0.0001 °C	0.0001 °C	0.0001 °C - 0.0002 °C	0.0 °C	0.0 °C - 0.0 °C	0.0 °C	0.0 °C - 0.0 °C	0.0 °C	0.0 °C - 0.0 °C	0.0 °C	0.0 °C - 0.0 °C	0.0 °C	0.0 °C - 0.0 °C	0.0 °C	0.0 °C - 0.0 °C	0.0 °C	0.0 °C - 0.0 °C	0.0 °C	0.0 °C - 0.0 °C	0.0 °C	0.0 °C - 0.0 °C	0.0 °C	0.0 °C - 0.0 °C	0.0 °C	0.0 °C - 0.0 °C	0.0 °C	0.0 °C - 0.0001 °C	0.0001 °C	0.0 °C - 0.0001 °C	0.0001 °C	0.0 °C - 0.0001 °C	0.0001 °C	0.0 °C - 0.0001 °C	0.0001 °C	0.0001 °C - 0.0001 °C	0.0002 °C	0.0001 °C - 0.0002 °C	0.0002 °C	0.0001 °C - 0.0002 °C	0.0001 °C	0.0 °C - 0.0002 °C	0.0003 °C	0.0002 °C - 0.0005 °C
			Multiplication of preindustrial probability (-)	1.0	1.0 - >10'000	1.0	1.0 - 1.01	>10'000	302.43 - >10'000	1.0	1.0 - 1.0	1.0	1.0 - 1.0	1.0	1.0 - >10'000	>10'000	1.0 - >10'000	1.0	1.0 - 1.0	1.01	1.0 - >10'000	1.0	1.0 - 1.0	1.0	1.0 - 1.0	>10'000	1.0 - >10'000	1.0	1.0 - 1.01	>10'000	1.0 - >10'000	1.0	1.0 - 1.0	21.42	1.0 - >10'000	>10'000	1.01 - >10'000	>10'000	1.0 - >10'000	1.06	1.0 - >10'000	1.06	1.0 - >10'000	>10'000	1.12 - >10'000	1.01	1.0 - >10'000	>10'000	1.09 - >10'000
		Coterra Energy	Contribution to intensity (°C)	0.0001 °C	0.0 °C - 0.0003 °C	0.0002 °C	-0.0 °C - 0.0004 °C	0.0005 °C	0.0003 °C - 0.0006 °C	0.0001 °C	0.0 °C - 0.0001 °C	0.0001 °C	0.0 °C - 0.0001 °C	0.0001 °C	0.0001 °C - 0.0002 °C	0.0002 °C	0.0001 °C - 0.0003 °C	0.0001 °C	0.0001 °C - 0.0001 °C	0.0002 °C	0.0001 °C - 0.0002 °C	0.0001 °C	0.0001 °C - 0.0002 °C	0.0002 °C	0.0001 °C - 0.0002 °C	0.0002 °C	0.0001 °C - 0.0003 °C	0.0002 °C	0.0001 °C - 0.0003 °C	0.0002 °C	0.0001 °C - 0.0003 °C	0.0003 °C	0.0001 °C - 0.0004 °C	0.0004 °C	0.0003 °C - 0.0006 °C	0.0004 °C	0.0003 °C - 0.0005 °C	0.0004 °C	0.0001 °C - 0.0007 °C	0.0004 °C	0.0003 °C - 0.0006 °C	0.0006 °C	0.0004 °C - 0.001 °C	0.0006 °C	0.0004 °C - 0.0008 °C	0.0004 °C	0.0001 °C - 0.0007 °C	0.0011 °C	0.0006 °C - 0.0015 °C
			Multiplication of preindustrial probability (-)	1.0	1.0 - >10'000	1.0	1.0 - 1.08	>10'000	1186.66 - >10'000	1.0	1.0 - >10'000	1.87	1.0 - >10'000	1.0	1.0 - >10'000	>10'000	1.01 - >10'000	1.01	1.0 - >10'000	1.78	1.0 - >10'000	1.0	1.0 - 1.0	1.0	1.0 - 1.0	>10'000	1.0 - >10'000	1.0	1.0 - 1.09	>10'000	1.04 - >10'000	1.0	1.0 - 1.02	119.81	1.0 - >10'000	>10'000	1.08 - >10'000	>10'000	1.0 - >10'000	1.3	1.0 - >10'000	1.23	1.0 - >10'000	>10'000	1.43 - >10'000	1.04	1.0 - >10'000	>10'000	1.27 - >10'000
		Cyprus AMAX Minerals	Contribution to intensity (°C)	0.0011 °C	0.0 °C - 0.0023 °C	0.0008 °C	-0.0002 °C - 0.0017 °C	0.0012 °C	0.0007 °C - 0.0017 °C	0.0019 °C	0.0011 °C - 0.0027 °C	0.0014 °C	0.0006 °C - 0.0024 °C	0.002 °C	0.0013 °C - 0.0026 °C	0.0013 °C	0.0007 °C - 0.0019 °C	0.0017 °C	0.0012 °C - 0.0023 °C	0.0018 °C	0.0013 °C - 0.0024 °C	0.0015 °C	0.0008 °C - 0.0021 °C	0.0015 °C	0.0008 °C - 0.0021 °C	0.0017 °C	0.0008 °C - 0.0024 °C	0.0015 °C	0.001 °C - 0.002 °C	0.0014 °C	0.0006 °C - 0.0018 °C	0.0014 °C	0.0006 °C - 0.002 °C	0.0017 °C	0.0012 °C - 0.0024 °C	0.0018 °C	0.0011 °C - 0.0023 °C	0.0018 °C	0.0005 °C - 0.003 °C	0.0015 °C	0.001 °C - 0.0022 °C	0.0017 °C	0.001 °C - 0.0026 °C	0.0014 °C	0.001 °C - 0.002 °C	0.001 °C	0.0003 °C - 0.0016 °C	0.0016 °C	0.001 °C - 0.0023 °C
			Multiplication of preindustrial probability (-)	1.04	1.0 - >10'000	1.01	1.0 - 1.38	>10'000	3187.16 - >10'000	1.12	1.01 - >10'000	16.61	1.0 - >10'000	1.08	1.01 - >10'000	>10'000	1.03 - >10'000	1.1	1.01 - >10'000	10.21	1.03 - >10'000	1.0	1.0 - 1.02	1.0	1.0 - 1.0	>10'000	1.01 - >10'000	1.01	1.0 - 1.68	>10'000	1.22 - >10'000	1.01	1.0 - 1.1	508.12	1.01 - >10'000	>10'000	1.33 - >10'000	>10'000	1.01 - >10'000	2.09	1.01 - >10'000	1.62	1.01 - >10'000	>10'000	1.99 - >10'000	1.1	1.0 - >10'000	>10'000	1.42 - >10'000
		Devon Energy	Contribution to intensity (°C)	0.001 °C	0.0 °C - 0.002 °C	0.0011 °C	-0.0002 °C - 0.0023 °C	0.002 °C	0.0012 °C - 0.0028 °C	0.0008 °C	0.0005 °C - 0.0011 °C	0.0007 °C	0.0003 °C - 0.0013 °C	0.0011 °C	0.0007 °C - 0.0015 °C	0.0016 °C	0.0008 °C - 0.0023 °C	0.0009 °C	0.0006 °C - 0.0012 °C	0.0013 °C	0.001 °C - 0.0017 °C	0.0012 °C	0.0006 °C - 0.0016 °C	0.0013 °C	0.0007 °C - 0.0018 °C	0.0016 °C	0.0007 °C - 0.0022 °C	0.0016 °C	0.001 °C - 0.0021 °C	0.0017 °C	0.0007 °C - 0.0022 °C	0.0018 °C	0.0008 °C - 0.0026 °C	0.0024 °C	0.0016 °C - 0.0033 °C	0.0025 °C	0.0016 °C - 0.0033 °C	0.0026 °C	0.0008 °C - 0.0041 °C	0.0023 °C	0.0015 °C - 0.0032 °C	0.0028 °C	0.0016 °C - 0.0043 °C	0.0024 °C	0.0017 °C - 0.0033 °C	0.0017 °C	0.0006 °C - 0.0027 °C	0.003 °C	0.0018 °C - 0.0042 °C
			Multiplication of preindustrial probability (-)	1.03	1.0 - >10'000	1.01	1.0 - 1.5	>10'000	5214.45 - >10'000	1.05	1.0 - >10'000	9.12	1.0 - >10'000	1.04	1.0 - >10'000	>10'000	1.04 - >10'000	1.05	1.0 - >10'000	7.62	1.02 - >10'000	1.0	1.0 - 1.02	1.0	1.0 - 1.0	>10'000	1.01 - >10'000	1.01	1.0 - 1.7	>10'000	1.27 - >10'000	1.01	1.0 - 1.13	711.14	1.02 - >10'000	>10'000	1.46 - >10'000	>10'000	1.01 - >10'000	2.62	1.01 - >10'000	2.01	1.01 - >10'000	>10'000	2.68 - >10'000	1.17	1.01 - >10'000	>10'000	1.76 - >10'000
		EOG Resources	Contribution to intensity (°C)	0.0003 °C	0.0 °C - 0.0006 °C	0.0004 °C	-0.0001 °C - 0.0008 °C	0.0008 °C	0.0005 °C - 0.0011 °C	0.0002 °C	0.0001 °C - 0.0003 °C	0.0002 °C	0.0001 °C - 0.0004 °C	0.0003 °C	0.0002 °C - 0.0004 °C	0.0006 °C	0.0003 °C - 0.0008 °C	0.0003 °C	0.0002 °C - 0.0003 °C	0.0004 °C	0.0003 °C - 0.0005 °C	0.0004 °C	0.0002 °C - 0.0005 °C	0.0004 °C	0.0002 °C - 0.0006 °C	0.0005 °C	0.0002 °C - 0.0007 °C	0.0005 °C	0.0003 °C - 0.0007 °C	0.0006 °C	0.0003 °C - 0.0008 °C	0.0006 °C	0.0003 °C - 0.0009 °C	0.0009 °C	0.0006 °C - 0.0012 °C	0.0009 °C	0.0006 °C - 0.0012 °C	0.0009 °C	0.0003 °C - 0.0015 °C	0.0009 °C	0.0006 °C - 0.0012 °C	0.0012 °C	0.0006 °C - 0.0018 °C	0.001 °C	0.0007 °C - 0.0014 °C	0.0007 °C	0.0002 °C - 0.0012 °C	0.0015 °C	0.0009 °C - 0.0021 °C
			Multiplication of preindustrial probability (-)	1.01	1.0 - >10'000	1.0	1.0 - 1.18	>10'000	2144.36 - >10'000	1.01	1.0 - >10'000	3.36	1.0 - >10'000	1.01	1.0 - >10'000	>10'000	1.01 - >10'000	1.01	1.0 - >10'000	2.97	1.01 - >10'000	1.0	1.0 - 1.01	1.0	1.0 - 1.0	>10'000	1.0 - >10'000	1.0	1.0 - 1.23	>10'000	1.09 - >10'000	1.0	1.0 - 1.05	261.51	1.01 - >10'000	>10'000	1.17 - >10'000	>10'000	1.0 - >10'000	1.62	1.0 - >10'000	1.42	1.0 - >10'000	>10'000	1.72 - >10'000	1.07	1.0 - >10'000	>10'000	1.39 - >10'000
		EQT Corporation	Contribution to intensity (°C)	0.0 °C	0.0 °C - 0.0001 °C	0.0001 °C	-0.0 °C - 0.0001 °C	0.0003 °C	0.0002 °C - 0.0004 °C	0.0 °C	0.0 °C - 0.0 °C	0.0 °C	0.0 °C - 0.0001 °C	0.0001 °C	0.0 °C - 0.0001 °C	0.0001 °C	0.0 °C - 0.0001 °C	0.0 °C	0.0 °C - 0.0001 °C	0.0001 °C	0.0 °C - 0.0001 °C	0.0001 °C	0.0 °C - 0.0001 °C	0.0001 °C	0.0 °C - 0.0001 °C	0.0001 °C	0.0 °C - 0.0001 °C	0.0001 °C	0.0001 °C - 0.0001 °C	0.0001 °C	0.0 °C - 0.0001 °C	0.0001 °C	0.0001 °C - 0.0002 °C	0.0002 °C	0.0001 °C - 0.0002 °C	0.0002 °C	0.0001 °C - 0.0002 °C	0.0002 °C	0.0001 °C - 0.0003 °C	0.0002 °C	0.0001 °C - 0.0003 °C	0.0004 °C	0.0002 °C - 0.0006 °C	0.0004 °C	0.0003 °C - 0.0006 °C	0.0003 °C	0.0001 °C - 0.0004 °C	0.0009 °C	0.0005 °C - 0.0012 °C
			Multiplication of preindustrial probability (-)	1.0	1.0 - >10'000	1.0	1.0 - 1.03	>10'000	712.31 - >10'000	1.0	1.0 - >10'000	1.37	1.0 - >10'000	1.0	1.0 - >10'000	>10'000	1.0 - >10'000	1.0	1.0 - >10'000	1.31	1.0 - >10'000	1.0	1.0 - 1.0	1.0	1.0 - 1.0	>10'000	1.0 - >10'000	1.0	1.0 - 1.03	>10'000	1.02 - >10'000	1.0	1.0 - 1.01	54.35	1.0 - >10'000	>10'000	1.03 - >10'000	>10'000	1.0 - >10'000	1.15	1.0 - >10'000	1.14	1.0 - >10'000	>10'000	1.28 - >10'000	1.03	1.0 - >10'000	>10'000	1.22 - >10'000
		ExxonMobil	Contribution to intensity (°C)	0.0182 °C	0.0006 °C - 0.0375 °C	0.0154 °C	-0.0029 °C - 0.0329 °C	0.0259 °C	0.0151 °C - 0.0354 °C	0.0254 °C	0.0149 °C - 0.0348 °C	0.0186 °C	0.0077 °C - 0.0331 °C	0.0276 °C	0.0177 °C - 0.037 °C	0.0244 °C	0.0127 °C - 0.0348 °C	0.0239 °C	0.017 °C - 0.0312 °C	0.0274 °C	0.0201 °C - 0.0365 °C	0.0233 °C	0.0127 °C - 0.0324 °C	0.0234 °C	0.0122 °C - 0.033 °C	0.0281 °C	0.0129 °C - 0.0393 °C	0.026 °C	0.0172 °C - 0.0346 °C	0.0251 °C	0.0111 °C - 0.0336 °C	0.0257 °C	0.0116 °C - 0.037 °C	0.0327 °C	0.0228 °C - 0.0459 °C	0.0343 °C	0.0219 °C - 0.0449 °C	0.0353 °C	0.0105 °C - 0.0572 °C	0.0308 °C	0.0198 °C - 0.0431 °C	0.0361 °C	0.0199 °C - 0.0552 °C	0.0306 °C	0.0213 °C - 0.0419 °C	0.0212 °C	0.0073 °C - 0.0339 °C	0.0369 °C	0.0221 °C - 0.0518 °C
			Multiplication of preindustrial probability (-)	1.61	1.01 - >10'000	1.16	1.02 - 8.14	>10'000	>10'000 - >10'000	2.55	1.07 - >10'000	214.46	1.04 - >10'000	2.07	1.09 - >10'000	>10'000	1.56 - >10'000	2.35	1.1 - >10'000	139.48	1.38 - >10'000	1.07	1.02 - 1.33	1.01	1.0 - 1.01	>10'000	1.17 - >10'000	1.23	1.04 - 12.68	>10'000	5.0 - >10'000	1.11	1.03 - 2.86	9820.47	1.29 - >10'000	>10'000	7.25 - >10'000	>10'000	1.12 - >10'000	22.73	1.17 - >10'000	13.89	1.11 - >10'000	>10'000	21.75 - >10'000	3.1	1.09 - >10'000	>10'000	10.32 - >10'000
		Hess Corporation	Contribution to intensity (°C)	0.001 °C	0.0 °C - 0.002 °C	0.0009 °C	-0.0002 °C - 0.0018 °C	0.0015 °C	0.0009 °C - 0.002 °C	0.0012 °C	0.0007 °C - 0.0017 °C	0.0009 °C	0.0004 °C - 0.0017 °C	0.0014 °C	0.0009 °C - 0.0019 °C	0.0013 °C	0.0007 °C - 0.0019 °C	0.0012 °C	0.0009 °C - 0.0016 °C	0.0014 °C	0.0011 °C - 0.0019 °C	0.0012 °C	0.0007 °C - 0.0017 °C	0.0012 °C	0.0007 °C - 0.0018 °C	0.0015 °C	0.0007 °C - 0.0021 °C	0.0014 °C	0.0009 °C - 0.0019 °C	0.0014 °C	0.0006 °C - 0.0019 °C	0.0014 °C	0.0006 °C - 0.0021 °C	0.0018 °C	0.0013 °C - 0.0026 °C	0.0019 °C	0.0012 °C - 0.0025 °C	0.002 °C	0.0006 °C - 0.0032 °C	0.0017 °C	0.0011 °C - 0.0024 °C	0.0021 °C	0.0011 °C - 0.0031 °C	0.0018 °C	0.0012 °C - 0.0024 °C	0.0012 °C	0.0004 °C - 0.0019 °C	0.0021 °C	0.0013 °C - 0.003 °C
			Multiplication of preindustrial probability (-)	1.03	1.0 - >10'000	1.01	1.0 - 1.4	>10'000	3797.11 - >10'000	1.08	1.0 - >10'000	11.84	1.0 - >10'000	1.05	1.0 - >10'000	>10'000	1.03 - >10'000	1.07	1.01 - >10'000	8.25	1.02 - >10'000	1.0	1.0 - 1.02	1.0	1.0 - 1.0	>10'000	1.01 - >10'000	1.01	1.0 - 1.63	>10'000	1.23 - >10'000	1.01	1.0 - 1.1	551.96	1.02 - >10'000	>10'000	1.36 - >10'000	>10'000	1.01 - >10'000	2.22	1.01 - >10'000	1.74	1.01 - >10'000	>10'000	2.21 - >10'000	1.12	1.01 - >10'000	>10'000	1.55 - >10'000
		Kiewit Mining Group	Contribution to intensity (°C)	0.0005 °C	0.0 °C - 0.001 °C	0.0005 °C	-0.0001 °C - 0.0011 °C	0.0009 °C	0.0005 °C - 0.0012 °C	0.0006 °C	0.0003 °C - 0.0008 °C	0.0004 °C	0.0002 °C - 0.0008 °C	0.0007 °C	0.0004 °C - 0.0009 °C	0.0008 °C	0.0004 °C - 0.0011 °C	0.0006 °C	0.0004 °C - 0.0007 °C	0.0007 °C	0.0005 °C - 0.0009 °C	0.0006 °C	0.0003 °C - 0.0009 °C	0.0006 °C	0.0003 °C - 0.0009 °C	0.0008 °C	0.0004 °C - 0.0011 °C	0.0008 °C	0.0005 °C - 0.001 °C	0.0008 °C	0.0004 °C - 0.0011 °C	0.0008 °C	0.0004 °C - 0.0012 °C	0.0011 °C	0.0008 °C - 0.0015 °C	0.0011 °C	0.0007 °C - 0.0015 °C	0.0012 °C	0.0004 °C - 0.0019 °C	0.001 °C	0.0007 °C - 0.0015 °C	0.0012 °C	0.0007 °C - 0.0019 °C	0.0011 °C	0.0007 °C - 0.0014 °C	0.0007 °C	0.0002 °C - 0.0012 °C	0.0013 °C	0.0008 °C - 0.0018 °C
			Multiplication of preindustrial probability (-)	1.02	1.0 - >10'000	1.01	1.0 - 1.23	>10'000	2272.84 - >10'000	1.03	1.0 - >10'000	5.95	1.0 - >10'000	1.03	1.0 - >10'000	>10'000	1.02 - >10'000	1.03	1.0 - >10'000	4.53	1.01 - >10'000	1.0	1.0 - 1.01	1.0	1.0 - 1.0	>10'000	1.0 - >10'000	1.01	1.0 - 1.35	>10'000	1.13 - >10'000	1.0	1.0 - 1.06	328.52	1.01 - >10'000	>10'000	1.21 - >10'000	>10'000	1.0 - >10'000	1.73	1.01 - >10'000	1.44	1.0 - >10'000	>10'000	1.72 - >10'000	1.07	1.0 - >10'000	>10'000	1.33 - >10'000
		Marathon Oil	Contribution to intensity (°C)	0.0012 °C	0.0 °C - 0.0025 °C	0.0011 °C	-0.0002 °C - 0.0023 °C	0.0018 °C	0.0011 °C - 0.0025 °C	0.0016 °C	0.001 °C - 0.0022 °C	0.0012 °C	0.0005 °C - 0.0022 °C	0.0018 °C	0.0012 °C - 0.0025 °C	0.0017 °C	0.0009 °C - 0.0024 °C	0.0016 °C	0.0011 °C - 0.0021 °C	0.0018 °C	0.0013 °C - 0.0024 °C	0.0016 °C	0.0009 °C - 0.0022 °C	0.0016 °C	0.0008 °C - 0.0022 °C	0.0019 °C	0.0009 °C - 0.0027 °C	0.0018 °C	0.0012 °C - 0.0024 °C	0.0017 °C	0.0008 °C - 0.0023 °C	0.0018 °C	0.0008 °C - 0.0026 °C	0.0023 °C	0.0016 °C - 0.0032 °C	0.0024 °C	0.0015 °C - 0.0031 °C	0.0025 °C	0.0007 °C - 0.004 °C	0.0022 °C	0.0014 °C - 0.003 °C	0.0026 °C	0.0014 °C - 0.0039 °C	0.0022 °C	0.0015 °C - 0.003 °C	0.0015 °C	0.0005 °C - 0.0024 °C	0.0027 °C	0.0016 °C - 0.0038 °C
			Multiplication of preindustrial probability (-)	1.04	1.0 - >10'000	1.01	1.0 - 1.5	>10'000	4736.0 - >10'000	1.1	1.0 - >10'000	15.06	1.0 - >10'000	1.07	1.01 - >10'000	>10'000	1.04 - >10'000	1.09	1.01 - >10'000	10.27	1.03 - >10'000	1.0	1.0 - 1.02	1.0	1.0 - 1.0	>10'000	1.01 - >10'000	1.02	1.0 - 1.79	>10'000	1.28 - >10'000	1.01	1.0 - 1.13	686.61	1.02 - >10'000	>10'000	1.44 - >10'000	>10'000	1.01 - >10'000	2.52	1.01 - >10'000	1.92	1.01 - >10'000	>10'000	2.51 - >10'000	1.15	1.01 - >10'000	>10'000	1.69 - >10'000
		Murphy Oil	Contribution to intensity (°C)	0.0002 °C	0.0 °C - 0.0004 °C	0.0002 °C	-0.0 °C - 0.0004 °C	0.0004 °C	0.0002 °C - 0.0005 °C	0.0002 °C	0.0001 °C - 0.0003 °C	0.0002 °C	0.0001 °C - 0.0003 °C	0.0003 °C	0.0002 °C - 0.0003 °C	0.0003 °C	0.0002 °C - 0.0004 °C	0.0002 °C	0.0001 °C - 0.0003 °C	0.0003 °C	0.0002 °C - 0.0004 °C	0.0002 °C	0.0001 °C - 0.0003 °C	0.0002 °C	0.0001 °C - 0.0003 °C	0.0003 °C	0.0001 °C - 0.0004 °C	0.0003 °C	0.0002 °C - 0.0004 °C	0.0003 °C	0.0001 °C - 0.0004 °C	0.0003 °C	0.0001 °C - 0.0005 °C	0.0004 °C	0.0003 °C - 0.0006 °C	0.0005 °C	0.0003 °C - 0.0006 °C	0.0005 °C	0.0001 °C - 0.0008 °C	0.0004 °C	0.0003 °C - 0.0006 °C	0.0005 °C	0.0003 °C - 0.0008 °C	0.0005 °C	0.0003 °C - 0.0006 °C	0.0003 °C	0.0001 °C - 0.0005 °C	0.0006 °C	0.0004 °C - 0.0009 °C
			Multiplication of preindustrial probability (-)	1.01	1.0 - >10'000	1.0	1.0 - 1.09	>10'000	991.35 - >10'000	1.01	1.0 - >10'000	2.87	1.0 - >10'000	1.01	1.0 - >10'000	>10'000	1.01 - >10'000	1.01	1.0 - >10'000	2.34	1.0 - >10'000	1.0	1.0 - 1.0	1.0	1.0 - 1.0	>10'000	1.0 - >10'000	1.0	1.0 - 1.13	>10'000	1.05 - >10'000	1.0	1.0 - 1.02	129.82	1.0 - >10'000	>10'000	1.08 - >10'000	>10'000	1.0 - >10'000	1.3	1.0 - >10'000	1.19	1.0 - >10'000	>10'000	1.32 - >10'000	1.03	1.0 - >10'000	>10'000	1.16 - >10'000
		Navajo Transitional Energy Company	Contribution to intensity (°C)	0.0 °C	0.0 °C - 0.0 °C	0.0 °C	0.0 °C - 0.0 °C	0.0 °C	0.0 °C - 0.0 °C	0.0 °C	0.0 °C - 0.0 °C	0.0 °C	0.0 °C - 0.0 °C	0.0 °C	0.0 °C - 0.0 °C	0.0 °C	0.0 °C - 0.0 °C	0.0 °C	0.0 °C - 0.0 °C	0.0 °C	0.0 °C - 0.0 °C	0.0 °C	0.0 °C - 0.0 °C	0.0 °C	0.0 °C - 0.0 °C	0.0 °C	0.0 °C - 0.0 °C	0.0 °C	0.0 °C - 0.0 °C	0.0 °C	0.0 °C - 0.0 °C	0.0 °C	0.0 °C - 0.0 °C	0.0 °C	0.0 °C - 0.0 °C	0.0 °C	0.0 °C - 0.0 °C	0.0 °C	0.0 °C - 0.0 °C	0.0 °C	0.0 °C - 0.0 °C	0.0 °C	0.0 °C - 0.0 °C	0.0 °C	0.0 °C - 0.0 °C	0.0 °C	0.0 °C - 0.0 °C	0.0002 °C	0.0001 °C - 0.0003 °C
			Multiplication of preindustrial probability (-)	1.0	1.0 - 1.0	1.0	1.0 - 1.0	>10'000	37.41 - >10'000	1.0	1.0 - 1.0	1.0	1.0 - 1.0	1.0	1.0 - 1.0	1.0	1.0 - 1.0	1.0	1.0 - 1.0	1.0	1.0 - 1.0	1.0	1.0 - 1.0	1.0	1.0 - 1.0	1.0	1.0 - 1.0	1.0	1.0 - 1.0	1.0	1.0 - 1.0	1.0	1.0 - 1.0	1.19	1.0 - >10'000	>10'000	1.0 - >10'000	>10'000	1.0 - >10'000	1.0	1.0 - >10'000	1.01	1.0 - >10'000	>10'000	1.02 - >10'000	1.0	1.0 - >10'000	>10'000	1.05 - >10'000
		North American Coal	Contribution to intensity (°C)	0.0005 °C	0.0 °C - 0.0011 °C	0.0005 °C	-0.0001 °C - 0.001 °C	0.0008 °C	0.0005 °C - 0.0011 °C	0.0006 °C	0.0003 °C - 0.0008 °C	0.0005 °C	0.0002 °C - 0.0008 °C	0.0007 °C	0.0004 °C - 0.0009 °C	0.0007 °C	0.0004 °C - 0.0011 °C	0.0006 °C	0.0004 °C - 0.0008 °C	0.0007 °C	0.0005 °C - 0.001 °C	0.0006 °C	0.0003 °C - 0.0009 °C	0.0007 °C	0.0003 °C - 0.0009 °C	0.0008 °C	0.0004 °C - 0.0011 °C	0.0008 °C	0.0005 °C - 0.001 °C	0.0008 °C	0.0003 °C - 0.001 °C	0.0008 °C	0.0004 °C - 0.0011 °C	0.001 °C	0.0007 °C - 0.0014 °C	0.0011 °C	0.0007 °C - 0.0014 °C	0.0011 °C	0.0003 °C - 0.0018 °C	0.001 °C	0.0006 °C - 0.0014 °C	0.0012 °C	0.0006 °C - 0.0018 °C	0.001 °C	0.0007 °C - 0.0014 °C	0.0007 °C	0.0002 °C - 0.0011 °C	0.0012 °C	0.0007 °C - 0.0017 °C
			Multiplication of preindustrial probability (-)	1.02	1.0 - >10'000	1.0	1.0 - 1.22	>10'000	2150.39 - >10'000	1.04	1.0 - >10'000	6.23	1.0 - >10'000	1.03	1.0 - >10'000	>10'000	1.02 - >10'000	1.03	1.0 - >10'000	4.71	1.01 - >10'000	1.0	1.0 - 1.01	1.0	1.0 - 1.0	>10'000	1.0 - >10'000	1.01	1.0 - 1.34	>10'000	1.12 - >10'000	1.0	1.0 - 1.06	305.89	1.01 - >10'000	>10'000	1.2 - >10'000	>10'000	1.0 - >10'000	1.68	1.01 - >10'000	1.42	1.0 - >10'000	>10'000	1.69 - >10'000	1.07	1.0 - >10'000	>10'000	1.32 - >10'000
		Occidental Petroleum	Contribution to intensity (°C)	0.0043 °C	0.0002 °C - 0.0088 °C	0.0037 °C	-0.0007 °C - 0.0079 °C	0.0063 °C	0.0037 °C - 0.0087 °C	0.0057 °C	0.0033 °C - 0.0078 °C	0.0042 °C	0.0018 °C - 0.0075 °C	0.0063 °C	0.0041 °C - 0.0085 °C	0.0058 °C	0.003 °C - 0.0083 °C	0.0054 °C	0.0039 °C - 0.0071 °C	0.0064 °C	0.0047 °C - 0.0085 °C	0.0054 °C	0.003 °C - 0.0076 °C	0.0055 °C	0.0029 °C - 0.0077 °C	0.0066 °C	0.003 °C - 0.0092 °C	0.0061 °C	0.004 °C - 0.0081 °C	0.006 °C	0.0026 °C - 0.008 °C	0.0061 °C	0.0028 °C - 0.0088 °C	0.0079 °C	0.0055 °C - 0.011 °C	0.0082 °C	0.0053 °C - 0.0108 °C	0.0085 °C	0.0025 °C - 0.0138 °C	0.0074 °C	0.0048 °C - 0.0104 °C	0.0088 °C	0.0049 °C - 0.0135 °C	0.0075 °C	0.0052 °C - 0.0103 °C	0.0052 °C	0.0018 °C - 0.0083 °C	0.0091 °C	0.0054 °C - 0.0128 °C
			Multiplication of preindustrial probability (-)	1.14	1.0 - >10'000	1.04	1.0 - 2.71	>10'000	>10'000 - >10'000	1.35	1.02 - >10'000	49.65	1.01 - >10'000	1.24	1.02 - >10'000	>10'000	1.13 - >10'000	1.31	1.02 - >10'000	33.24	1.09 - >10'000	1.02	1.0 - 1.08	1.0	1.0 - 1.0	>10'000	1.04 - >10'000	1.05	1.01 - 3.74	>10'000	1.97 - >10'000	1.03	1.01 - 1.44	2361.73	1.07 - >10'000	>10'000	2.52 - >10'000	>10'000	1.03 - >10'000	6.25	1.04 - >10'000	4.16	1.03 - >10'000	>10'000	6.17 - >10'000	1.52	1.02 - >10'000	>10'000	3.33 - >10'000
		Peabody Coal Group	Contribution to intensity (°C)	0.0053 °C	0.0002 °C - 0.0109 °C	0.0052 °C	-0.001 °C - 0.0111 °C	0.0094 °C	0.0055 °C - 0.0128 °C	0.0056 °C	0.0033 °C - 0.0077 °C	0.0044 °C	0.0018 °C - 0.0079 °C	0.0069 °C	0.0044 °C - 0.0092 °C	0.008 °C	0.0042 °C - 0.0115 °C	0.0057 °C	0.0041 °C - 0.0075 °C	0.0074 °C	0.0054 °C - 0.0098 °C	0.0065 °C	0.0036 °C - 0.0091 °C	0.0068 °C	0.0036 °C - 0.0096 °C	0.0085 °C	0.0039 °C - 0.0119 °C	0.0081 °C	0.0053 °C - 0.0108 °C	0.0083 °C	0.0036 °C - 0.0111 °C	0.0087 °C	0.0039 °C - 0.0125 °C	0.0113 °C	0.0079 °C - 0.0158 °C	0.0118 °C	0.0075 °C - 0.0155 °C	0.0122 °C	0.0036 °C - 0.0197 °C	0.0108 °C	0.007 °C - 0.0151 °C	0.0131 °C	0.0072 °C - 0.02 °C	0.0112 °C	0.0078 °C - 0.0154 °C	0.0078 °C	0.0027 °C - 0.0124 °C	0.0138 °C	0.0082 °C - 0.0194 °C
			Multiplication of preindustrial probability (-)	1.18	1.0 - >10'000	1.05	1.01 - 3.41	>10'000	>10'000 - >10'000	1.34	1.02 - >10'000	52.02	1.01 - >10'000	1.27	1.02 - >10'000	>10'000	1.19 - >10'000	1.32	1.02 - >10'000	38.37	1.1 - >10'000	1.02	1.01 - 1.09	1.0	1.0 - 1.0	>10'000	1.05 - >10'000	1.07	1.01 - 4.62	>10'000	2.34 - >10'000	1.04	1.01 - 1.62	3385.25	1.1 - >10'000	>10'000	3.17 - >10'000	>10'000	1.04 - >10'000	8.63	1.06 - >10'000	5.68	1.04 - >10'000	>10'000	8.69 - >10'000	1.77	1.03 - >10'000	>10'000	4.52 - >10'000
		Pioneer Natural Resources	Contribution to intensity (°C)	0.0001 °C	0.0 °C - 0.0003 °C	0.0001 °C	-0.0 °C - 0.0003 °C	0.0003 °C	0.0002 °C - 0.0004 °C	0.0001 °C	0.0001 °C - 0.0001 °C	0.0001 °C	0.0 °C - 0.0002 °C	0.0002 °C	0.0001 °C - 0.0002 °C	0.0002 °C	0.0001 °C - 0.0003 °C	0.0001 °C	0.0001 °C - 0.0002 °C	0.0002 °C	0.0001 °C - 0.0003 °C	0.0002 °C	0.0001 °C - 0.0002 °C	0.0002 °C	0.0001 °C - 0.0003 °C	0.0002 °C	0.0001 °C - 0.0003 °C	0.0002 °C	0.0001 °C - 0.0003 °C	0.0002 °C	0.0001 °C - 0.0003 °C	0.0003 °C	0.0001 °C - 0.0004 °C	0.0003 °C	0.0002 °C - 0.0005 °C	0.0004 °C	0.0002 °C - 0.0005 °C	0.0004 °C	0.0001 °C - 0.0006 °C	0.0003 °C	0.0002 °C - 0.0005 °C	0.0004 °C	0.0002 °C - 0.0007 °C	0.0004 °C	0.0003 °C - 0.0005 °C	0.0003 °C	0.0001 °C - 0.0004 °C	0.0006 °C	0.0004 °C - 0.0008 °C
			Multiplication of preindustrial probability (-)	1.0	1.0 - >10'000	1.0	1.0 - 1.07	>10'000	810.06 - >10'000	1.01	1.0 - >10'000	2.1	1.0 - >10'000	1.01	1.0 - >10'000	>10'000	1.01 - >10'000	1.01	1.0 - >10'000	1.95	1.0 - >10'000	1.0	1.0 - 1.0	1.0	1.0 - 1.0	>10'000	1.0 - >10'000	1.0	1.0 - 1.1	>10'000	1.04 - >10'000	1.0	1.0 - 1.02	101.55	1.0 - >10'000	>10'000	1.06 - >10'000	>10'000	1.0 - >10'000	1.23	1.0 - >10'000	1.16	1.0 - >10'000	>10'000	1.27 - >10'000	1.03	1.0 - >10'000	>10'000	1.16 - >10'000
		SM Energy	Contribution to intensity (°C)	0.0 °C	0.0 °C - 0.0001 °C	0.0001 °C	-0.0 °C - 0.0001 °C	0.0001 °C	0.0001 °C - 0.0002 °C	0.0 °C	0.0 °C - 0.0 °C	0.0 °C	0.0 °C - 0.0 °C	0.0 °C	0.0 °C - 0.0 °C	0.0001 °C	0.0 °C - 0.0001 °C	0.0 °C	0.0 °C - 0.0 °C	0.0 °C	0.0 °C - 0.0001 °C	0.0 °C	0.0 °C - 0.0001 °C	0.0 °C	0.0 °C - 0.0001 °C	0.0001 °C	0.0 °C - 0.0001 °C	0.0001 °C	0.0 °C - 0.0001 °C	0.0001 °C	0.0 °C - 0.0001 °C	0.0001 °C	0.0 °C - 0.0001 °C	0.0001 °C	0.0001 °C - 0.0002 °C	0.0001 °C	0.0001 °C - 0.0002 °C	0.0001 °C	0.0 °C - 0.0002 °C	0.0001 °C	0.0001 °C - 0.0002 °C	0.0002 °C	0.0001 °C - 0.0003 °C	0.0002 °C	0.0001 °C - 0.0003 °C	0.0001 °C	0.0 °C - 0.0002 °C	0.0003 °C	0.0002 °C - 0.0004 °C
			Multiplication of preindustrial probability (-)	1.0	1.0 - >10'000	1.0	1.0 - 1.02	>10'000	377.45 - >10'000	1.0	1.0 - >10'000	1.18	1.0 - >10'000	1.0	1.0 - >10'000	>10'000	1.0 - >10'000	1.0	1.0 - >10'000	1.19	1.0 - >10'000	1.0	1.0 - 1.0	1.0	1.0 - 1.0	>10'000	1.0 - >10'000	1.0	1.0 - 1.03	>10'000	1.01 - >10'000	1.0	1.0 - 1.01	39.07	1.0 - >10'000	>10'000	1.02 - >10'000	>10'000	1.0 - >10'000	1.1	1.0 - >10'000	1.07	1.0 - >10'000	>10'000	1.13 - >10'000	1.01	1.0 - >10'000	>10'000	1.07 - >10'000
		Southwestern Energy	Contribution to intensity (°C)	0.0 °C	0.0 °C - 0.0001 °C	0.0001 °C	-0.0 °C - 0.0002 °C	0.0004 °C	0.0002 °C - 0.0005 °C	0.0 °C	0.0 °C - 0.0 °C	0.0 °C	0.0 °C - 0.0 °C	0.0 °C	0.0 °C - 0.0001 °C	0.0001 °C	0.0001 °C - 0.0002 °C	0.0 °C	0.0 °C - 0.0 °C	0.0 °C	0.0 °C - 0.0001 °C	0.0 °C	0.0 °C - 0.0001 °C	0.0001 °C	0.0 °C - 0.0001 °C	0.0001 °C	0.0 °C - 0.0001 °C	0.0001 °C	0.0001 °C - 0.0001 °C	0.0001 °C	0.0001 °C - 0.0002 °C	0.0002 °C	0.0001 °C - 0.0003 °C	0.0003 °C	0.0002 °C - 0.0004 °C	0.0003 °C	0.0002 °C - 0.0004 °C	0.0003 °C	0.0001 °C - 0.0005 °C	0.0003 °C	0.0002 °C - 0.0005 °C	0.0005 °C	0.0003 °C - 0.0008 °C	0.0005 °C	0.0004 °C - 0.0007 °C	0.0004 °C	0.0001 °C - 0.0006 °C	0.0009 °C	0.0005 °C - 0.0013 °C
			Multiplication of preindustrial probability (-)	1.0	1.0 - >10'000	1.0	1.0 - 1.05	>10'000	986.76 - >10'000	1.0	1.0 - >10'000	1.28	1.0 - >10'000	1.0	1.0 - >10'000	>10'000	1.0 - >10'000	1.0	1.0 - >10'000	1.23	1.0 - >10'000	1.0	1.0 - 1.0	1.0	1.0 - 1.0	>10'000	1.0 - >10'000	1.0	1.0 - 1.04	>10'000	1.02 - >10'000	1.0	1.0 - 1.01	85.44	1.0 - >10'000	>10'000	1.05 - >10'000	>10'000	1.0 - >10'000	1.23	1.0 - >10'000	1.19	1.0 - >10'000	>10'000	1.36 - >10'000	1.04	1.0 - >10'000	>10'000	1.23 - >10'000
		Vistra	Contribution to intensity (°C)	0.0005 °C	0.0 °C - 0.001 °C	0.0004 °C	-0.0001 °C - 0.0009 °C	0.0007 °C	0.0004 °C - 0.001 °C	0.0006 °C	0.0004 °C - 0.0008 °C	0.0005 °C	0.0002 °C - 0.0008 °C	0.0007 °C	0.0004 °C - 0.0009 °C	0.0007 °C	0.0003 °C - 0.0009 °C	0.0006 °C	0.0004 °C - 0.0008 °C	0.0007 °C	0.0005 °C - 0.0009 °C	0.0006 °C	0.0003 °C - 0.0008 °C	0.0006 °C	0.0003 °C - 0.0009 °C	0.0007 °C	0.0003 °C - 0.001 °C	0.0007 °C	0.0005 °C - 0.0009 °C	0.0007 °C	0.0003 °C - 0.0009 °C	0.0007 °C	0.0003 °C - 0.001 °C	0.0009 °C	0.0006 °C - 0.0013 °C	0.001 °C	0.0006 °C - 0.0012 °C	0.001 °C	0.0003 °C - 0.0016 °C	0.0009 °C	0.0006 °C - 0.0012 °C	0.001 °C	0.0006 °C - 0.0016 °C	0.0009 °C	0.0006 °C - 0.0012 °C	0.0006 °C	0.0002 °C - 0.001 °C	0.0011 °C	0.0006 °C - 0.0015 °C
			Multiplication of preindustrial probability (-)	1.02	1.0 - >10'000	1.0	1.0 - 1.2	>10'000	1915.53 - >10'000	1.04	1.0 - >10'000	6.25	1.0 - >10'000	1.03	1.0 - >10'000	>10'000	1.02 - >10'000	1.03	1.0 - >10'000	4.52	1.01 - >10'000	1.0	1.0 - 1.01	1.0	1.0 - 1.0	>10'000	1.0 - >10'000	1.01	1.0 - 1.3	>10'000	1.11 - >10'000	1.0	1.0 - 1.05	273.18	1.01 - >10'000	>10'000	1.18 - >10'000	>10'000	1.0 - >10'000	1.61	1.0 - >10'000	1.37	1.0 - >10'000	>10'000	1.61 - >10'000	1.06	1.0 - >10'000	>10'000	1.27 - >10'000
		Westmoreland Mining	Contribution to intensity (°C)	0.0006 °C	0.0 °C - 0.0013 °C	0.0006 °C	-0.0001 °C - 0.0013 °C	0.0012 °C	0.0007 °C - 0.0016 °C	0.0007 °C	0.0004 °C - 0.0009 °C	0.0005 °C	0.0002 °C - 0.0009 °C	0.0008 °C	0.0005 °C - 0.0011 °C	0.0009 °C	0.0005 °C - 0.0013 °C	0.0007 °C	0.0005 °C - 0.0009 °C	0.0009 °C	0.0006 °C - 0.0012 °C	0.0008 °C	0.0004 °C - 0.0011 °C	0.0008 °C	0.0004 °C - 0.0011 °C	0.001 °C	0.0005 °C - 0.0014 °C	0.0009 °C	0.0006 °C - 0.0012 °C	0.0009 °C	0.0004 °C - 0.0013 °C	0.001 °C	0.0004 °C - 0.0014 °C	0.0013 °C	0.0009 °C - 0.0018 °C	0.0014 °C	0.0009 °C - 0.0018 °C	0.0014 °C	0.0004 °C - 0.0023 °C	0.0013 °C	0.0008 °C - 0.0018 °C	0.0016 °C	0.0009 °C - 0.0025 °C	0.0014 °C	0.001 °C - 0.0019 °C	0.001 °C	0.0003 °C - 0.0015 °C	0.0017 °C	0.001 °C - 0.0024 °C
			Multiplication of preindustrial probability (-)	1.02	1.0 - >10'000	1.01	1.0 - 1.27	>10'000	2959.34 - >10'000	1.04	1.0 - >10'000	7.13	1.0 - >10'000	1.03	1.0 - >10'000	>10'000	1.02 - >10'000	1.04	1.0 - >10'000	5.41	1.01 - >10'000	1.0	1.0 - 1.01	1.0	1.0 - 1.0	>10'000	1.01 - >10'000	1.01	1.0 - 1.42	>10'000	1.15 - >10'000	1.0	1.0 - 1.07	389.99	1.01 - >10'000	>10'000	1.25 - >10'000	>10'000	1.0 - >10'000	1.89	1.01 - >10'000	1.57	1.0 - >10'000	>10'000	1.97 - >10'000	1.1	1.0 - >10'000	>10'000	1.45 - >10'000
		Wolverine Fuels	Contribution to intensity (°C)	0.0001 °C	0.0 °C - 0.0001 °C	0.0001 °C	-0.0 °C - 0.0001 °C	0.0002 °C	0.0001 °C - 0.0002 °C	0.0 °C	0.0 °C - 0.0 °C	0.0 °C	0.0 °C - 0.0 °C	0.0 °C	0.0 °C - 0.0001 °C	0.0001 °C	0.0 °C - 0.0001 °C	0.0 °C	0.0 °C - 0.0 °C	0.0001 °C	0.0 °C - 0.0001 °C	0.0001 °C	0.0 °C - 0.0001 °C	0.0001 °C	0.0 °C - 0.0001 °C	0.0001 °C	0.0 °C - 0.0001 °C	0.0001 °C	0.0001 °C - 0.0001 °C	0.0001 °C	0.0 °C - 0.0001 °C	0.0001 °C	0.0001 °C - 0.0002 °C	0.0002 °C	0.0001 °C - 0.0002 °C	0.0002 °C	0.0001 °C - 0.0002 °C	0.0002 °C	0.0001 °C - 0.0003 °C	0.0002 °C	0.0001 °C - 0.0002 °C	0.0003 °C	0.0001 °C - 0.0004 °C	0.0002 °C	0.0002 °C - 0.0003 °C	0.0002 °C	0.0001 °C - 0.0003 °C	0.0003 °C	0.0002 °C - 0.0005 °C
			Multiplication of preindustrial probability (-)	1.0	1.0 - >10'000	1.0	1.0 - 1.03	>10'000	466.07 - >10'000	1.0	1.0 - >10'000	1.25	1.0 - >10'000	1.0	1.0 - >10'000	>10'000	1.0 - >10'000	1.0	1.0 - >10'000	1.31	1.0 - >10'000	1.0	1.0 - 1.0	1.0	1.0 - 1.0	>10'000	1.0 - >10'000	1.0	1.0 - 1.04	>10'000	1.02 - >10'000	1.0	1.0 - 1.01	49.49	1.0 - >10'000	>10'000	1.03 - >10'000	>10'000	1.0 - >10'000	1.12	1.0 - >10'000	1.09	1.0 - >10'000	>10'000	1.16 - >10'000	1.02	1.0 - >10'000	>10'000	1.09 - >10'000
South Asia	Inde	Adani Enterprises	Contribution to intensity (°C)	0.0 °C	0.0 °C - 0.0 °C	0.0 °C	-0.0 °C - 0.0 °C	0.0001 °C	0.0 °C - 0.0001 °C	0.0 °C	0.0 °C - 0.0 °C	0.0 °C	0.0 °C - 0.0 °C	0.0 °C	0.0 °C - 0.0 °C	0.0 °C	0.0 °C - 0.0 °C	0.0 °C	0.0 °C - 0.0 °C	0.0 °C	0.0 °C - 0.0 °C	0.0 °C	0.0 °C - 0.0 °C	0.0 °C	0.0 °C - 0.0 °C	0.0 °C	0.0 °C - 0.0 °C	0.0 °C	0.0 °C - 0.0 °C	0.0 °C	0.0 °C - 0.0 °C	0.0 °C	0.0 °C - 0.0 °C	0.0 °C	0.0 °C - 0.0 °C	0.0 °C	0.0 °C - 0.0 °C	0.0 °C	0.0 °C - 0.0 °C	0.0 °C	0.0 °C - 0.0 °C	0.0001 °C	0.0 °C - 0.0001 °C	0.0001 °C	0.0001 °C - 0.0001 °C	0.0001 °C	0.0 °C - 0.0001 °C	0.0002 °C	0.0001 °C - 0.0003 °C
			Multiplication of preindustrial probability (-)	1.0	1.0 - 1.0	1.0	1.0 - 1.0	>10'000	136.99 - >10'000	1.0	1.0 - 1.0	1.0	1.0 - 1.0	1.0	1.0 - 1.0	>10'000	1.0 - >10'000	1.0	1.0 - 1.0	1.0	1.0 - 1.0	1.0	1.0 - 1.0	1.0	1.0 - 1.0	1.0	1.0 - 1.0	1.0	1.0 - 1.0	>10'000	1.0 - >10'000	1.0	1.0 - 1.0	6.35	1.0 - >10'000	>10'000	1.0 - >10'000	>10'000	1.0 - >10'000	1.02	1.0 - >10'000	1.03	1.0 - >10'000	>10'000	1.06 - >10'000	1.01	1.0 - >10'000	>10'000	1.05 - >10'000
	India	Coal India	Contribution to intensity (°C)	0.0068 °C	0.0002 °C - 0.0139 °C	0.007 °C	-0.0013 °C - 0.0149 °C	0.0138 °C	0.008 °C - 0.0188 °C	0.007 °C	0.0041 °C - 0.0096 °C	0.0056 °C	0.0023 °C - 0.01 °C	0.0087 °C	0.0056 °C - 0.0116 °C	0.0107 °C	0.0056 °C - 0.0152 °C	0.0072 °C	0.0051 °C - 0.0094 °C	0.0093 °C	0.0068 °C - 0.0124 °C	0.0083 °C	0.0045 °C - 0.0115 °C	0.0087 °C	0.0045 °C - 0.0123 °C	0.0109 °C	0.005 °C - 0.0152 °C	0.0105 °C	0.0069 °C - 0.014 °C	0.011 °C	0.0049 °C - 0.0147 °C	0.0117 °C	0.0053 °C - 0.0168 °C	0.0155 °C	0.0108 °C - 0.0217 °C	0.0162 °C	0.0103 °C - 0.0212 °C	0.0167 °C	0.005 °C - 0.027 °C	0.0151 °C	0.0097 °C - 0.0212 °C	0.0192 °C	0.0106 °C - 0.0294 °C	0.017 °C	0.0118 °C - 0.0232 °C	0.0117 °C	0.004 °C - 0.0188 °C	0.0229 °C	0.0137 °C - 0.0322 °C
			Multiplication of preindustrial probability (-)	1.23	1.01 - >10'000	1.07	1.01 - 4.25	>10'000	>10'000 - >10'000	1.43	1.02 - >10'000	65.21	1.01 - >10'000	1.33	1.03 - >10'000	>10'000	1.25 - >10'000	1.4	1.03 - >10'000	48.27	1.13 - >10'000	1.03	1.01 - 1.12	1.0	1.0 - 1.0	>10'000	1.07 - >10'000	1.09	1.02 - 5.7	>10'000	2.78 - >10'000	1.05	1.01 - 1.84	4641.8	1.14 - >10'000	>10'000	3.98 - >10'000	>10'000	1.06 - >10'000	11.67	1.08 - >10'000	7.87	1.06 - >10'000	>10'000	12.58 - >10'000	2.16	1.05 - >10'000	>10'000	6.82 - >10'000
		ONGC India	Contribution to intensity (°C)	0.0019 °C	0.0001 °C - 0.0038 °C	0.0018 °C	-0.0003 °C - 0.0037 °C	0.0031 °C	0.0018 °C - 0.0043 °C	0.0021 °C	0.0012 °C - 0.0029 °C	0.0016 °C	0.0007 °C - 0.0029 °C	0.0025 °C	0.0016 °C - 0.0034 °C	0.0027 °C	0.0014 °C - 0.0039 °C	0.0021 °C	0.0015 °C - 0.0028 °C	0.0026 °C	0.0019 °C - 0.0035 °C	0.0023 °C	0.0013 °C - 0.0032 °C	0.0024 °C	0.0012 °C - 0.0034 °C	0.0029 °C	0.0013 °C - 0.0041 °C	0.0028 °C	0.0018 °C - 0.0037 °C	0.0028 °C	0.0012 °C - 0.0038 °C	0.0029 °C	0.0013 °C - 0.0042 °C	0.0038 °C	0.0026 °C - 0.0053 °C	0.004 °C	0.0025 °C - 0.0052 °C	0.0041 °C	0.0012 °C - 0.0066 °C	0.0036 °C	0.0023 °C - 0.0051 °C	0.0044 °C	0.0024 °C - 0.0067 °C	0.0037 °C	0.0026 °C - 0.0051 °C	0.0026 °C	0.0009 °C - 0.0041 °C	0.0046 °C	0.0028 °C - 0.0065 °C
			Multiplication of preindustrial probability (-)	1.06	1.0 - >10'000	1.02	1.0 - 1.81	>10'000	8015.2 - >10'000	1.13	1.01 - >10'000	19.84	1.0 - >10'000	1.1	1.01 - >10'000	>10'000	1.06 - >10'000	1.12	1.01 - >10'000	14.38	1.04 - >10'000	1.01	1.0 - 1.03	1.0	1.0 - 1.0	>10'000	1.02 - >10'000	1.02	1.0 - 2.24	>10'000	1.46 - >10'000	1.01	1.0 - 1.21	1137.99	1.03 - >10'000	>10'000	1.73 - >10'000	>10'000	1.01 - >10'000	3.55	1.02 - >10'000	2.56	1.01 - >10'000	>10'000	3.57 - >10'000	1.26	1.01 - >10'000	>10'000	2.19 - >10'000
		Singareni Collieries	Contribution to intensity (°C)	0.0008 °C	0.0 °C - 0.0016 °C	0.0008 °C	-0.0001 °C - 0.0017 °C	0.0016 °C	0.0009 °C - 0.0021 °C	0.0008 °C	0.0005 °C - 0.0011 °C	0.0006 °C	0.0003 °C - 0.0011 °C	0.001 °C	0.0006 °C - 0.0013 °C	0.0012 °C	0.0006 °C - 0.0017 °C	0.0008 °C	0.0006 °C - 0.0011 °C	0.001 °C	0.0008 °C - 0.0014 °C	0.0009 °C	0.0005 °C - 0.0013 °C	0.001 °C	0.0005 °C - 0.0014 °C	0.0012 °C	0.0006 °C - 0.0017 °C	0.0012 °C	0.0008 °C - 0.0016 °C	0.0012 °C	0.0005 °C - 0.0017 °C	0.0013 °C	0.0006 °C - 0.0019 °C	0.0018 °C	0.0012 °C - 0.0025 °C	0.0018 °C	0.0012 °C - 0.0024 °C	0.0019 °C	0.0006 °C - 0.0031 °C	0.0017 °C	0.0011 °C - 0.0024 °C	0.0022 °C	0.0012 °C - 0.0033 °C	0.0019 °C	0.0013 °C - 0.0026 °C	0.0013 °C	0.0005 °C - 0.0021 °C	0.0026 °C	0.0015 °C - 0.0036 °C
			Multiplication of preindustrial probability (-)	1.03	1.0 - >10'000	1.01	1.0 - 1.37	>10'000	4015.0 - >10'000	1.05	1.0 - >10'000	8.24	1.0 - >10'000	1.04	1.0 - >10'000	>10'000	1.03 - >10'000	1.05	1.0 - >10'000	6.31	1.01 - >10'000	1.0	1.0 - 1.01	1.0	1.0 - 1.0	>10'000	1.01 - >10'000	1.01	1.0 - 1.53	>10'000	1.2 - >10'000	1.01	1.0 - 1.1	527.29	1.02 - >10'000	>10'000	1.34 - >10'000	>10'000	1.01 - >10'000	2.21	1.01 - >10'000	1.78	1.01 - >10'000	>10'000	2.32 - >10'000	1.13	1.01 - >10'000	>10'000	1.66 - >10'000
Sub-Saharan Africa	Angola	Sonangol	Contribution to intensity (°C)	0.0006 °C	0.0 °C - 0.0013 °C	0.0008 °C	-0.0001 °C - 0.0016 °C	0.0015 °C	0.0009 °C - 0.0021 °C	0.0005 °C	0.0003 °C - 0.0008 °C	0.0005 °C	0.0002 °C - 0.0008 °C	0.0007 °C	0.0005 °C - 0.001 °C	0.0011 °C	0.0006 °C - 0.0016 °C	0.0006 °C	0.0004 °C - 0.0008 °C	0.0008 °C	0.0006 °C - 0.0011 °C	0.0008 °C	0.0004 °C - 0.001 °C	0.0008 °C	0.0004 °C - 0.0012 °C	0.0011 °C	0.0005 °C - 0.0015 °C	0.0011 °C	0.0007 °C - 0.0014 °C	0.0012 °C	0.0005 °C - 0.0016 °C	0.0013 °C	0.0006 °C - 0.0018 °C	0.0017 °C	0.0012 °C - 0.0024 °C	0.0018 °C	0.0011 °C - 0.0023 °C	0.0018 °C	0.0005 °C - 0.003 °C	0.0017 °C	0.0011 °C - 0.0024 °C	0.0022 °C	0.0012 °C - 0.0033 °C	0.0019 °C	0.0013 °C - 0.0026 °C	0.0013 °C	0.0005 °C - 0.0021 °C	0.0025 °C	0.0015 °C - 0.0035 °C
			Multiplication of preindustrial probability (-)	1.02	1.0 - >10'000	1.01	1.0 - 1.35	>10'000	3971.32 - >10'000	1.03	1.0 - >10'000	6.22	1.0 - >10'000	1.03	1.0 - >10'000	>10'000	1.03 - >10'000	1.03	1.0 - >10'000	5.13	1.01 - >10'000	1.0	1.0 - 1.01	1.0	1.0 - 1.0	>10'000	1.01 - >10'000	1.01	1.0 - 1.47	>10'000	1.19 - >10'000	1.01	1.0 - 1.09	512.42	1.01 - >10'000	>10'000	1.33 - >10'000	>10'000	1.01 - >10'000	2.19	1.01 - >10'000	1.77	1.01 - >10'000	>10'000	2.31 - >10'000	1.13	1.01 - >10'000	>10'000	1.64 - >10'000
	Nigeria	Nigerian National Petroleum Corp.	Contribution to intensity (°C)	0.0026 °C	0.0001 °C - 0.0054 °C	0.0026 °C	-0.0005 °C - 0.0056 °C	0.0049 °C	0.0029 °C - 0.0067 °C	0.0029 °C	0.0017 °C - 0.0039 °C	0.0022 °C	0.0009 °C - 0.004 °C	0.0035 °C	0.0022 °C - 0.0046 °C	0.004 °C	0.0021 °C - 0.0057 °C	0.0029 °C	0.0021 °C - 0.0038 °C	0.0037 °C	0.0027 °C - 0.0049 °C	0.0033 °C	0.0018 °C - 0.0045 °C	0.0034 °C	0.0018 °C - 0.0048 °C	0.0042 °C	0.0019 °C - 0.0059 °C	0.004 °C	0.0027 °C - 0.0054 °C	0.0041 °C	0.0018 °C - 0.0055 °C	0.0044 °C	0.002 °C - 0.0063 °C	0.0057 °C	0.004 °C - 0.008 °C	0.006 °C	0.0038 °C - 0.0079 °C	0.0062 °C	0.0018 °C - 0.01 °C	0.0055 °C	0.0036 °C - 0.0078 °C	0.0069 °C	0.0038 °C - 0.0105 °C	0.006 °C	0.0041 °C - 0.0082 °C	0.0041 °C	0.0014 °C - 0.0066 °C	0.0077 °C	0.0046 °C - 0.0109 °C
			Multiplication of preindustrial probability (-)	1.09	1.0 - >10'000	1.03	1.0 - 2.21	>10'000	>10'000 - >10'000	1.18	1.01 - >10'000	26.82	1.0 - >10'000	1.13	1.01 - >10'000	>10'000	1.09 - >10'000	1.16	1.01 - >10'000	19.69	1.05 - >10'000	1.01	1.0 - 1.05	1.0	1.0 - 1.0	>10'000	1.03 - >10'000	1.04	1.01 - 2.8	>10'000	1.67 - >10'000	1.02	1.01 - 1.31	1716.05	1.05 - >10'000	>10'000	2.1 - >10'000	>10'000	1.02 - >10'000	4.9	1.03 - >10'000	3.45	1.02 - >10'000	>10'000	5.11 - >10'000	1.41	1.02 - >10'000	>10'000	2.98 - >10'000
	South Africa	Exxaro Resources Ltd	Contribution to intensity (°C)	0.0003 °C	0.0 °C - 0.0006 °C	0.0005 °C	-0.0001 °C - 0.001 °C	0.0011 °C	0.0006 °C - 0.0014 °C	0.0001 °C	0.0001 °C - 0.0001 °C	0.0001 °C	0.0 °C - 0.0002 °C	0.0002 °C	0.0001 °C - 0.0003 °C	0.0007 °C	0.0004 °C - 0.001 °C	0.0002 °C	0.0001 °C - 0.0002 °C	0.0003 °C	0.0002 °C - 0.0004 °C	0.0003 °C	0.0002 °C - 0.0005 °C	0.0004 °C	0.0002 °C - 0.0006 °C	0.0006 °C	0.0003 °C - 0.0008 °C	0.0006 °C	0.0004 °C - 0.0008 °C	0.0007 °C	0.0003 °C - 0.0009 °C	0.0008 °C	0.0004 °C - 0.0011 °C	0.0011 °C	0.0008 °C - 0.0015 °C	0.0011 °C	0.0007 °C - 0.0015 °C	0.0012 °C	0.0004 °C - 0.0019 °C	0.0011 °C	0.0007 °C - 0.0015 °C	0.0015 °C	0.0008 °C - 0.0022 °C	0.0013 °C	0.0009 °C - 0.0018 °C	0.0009 °C	0.0003 °C - 0.0015 °C	0.0018 °C	0.0011 °C - 0.0026 °C
			Multiplication of preindustrial probability (-)	1.01	1.0 - >10'000	1.0	1.0 - 1.22	>10'000	2707.69 - >10'000	1.01	1.0 - >10'000	2.38	1.0 - >10'000	1.01	1.0 - >10'000	>10'000	1.02 - >10'000	1.01	1.0 - >10'000	2.6	1.0 - >10'000	1.0	1.0 - 1.0	1.0	1.0 - 1.0	>10'000	1.0 - >10'000	1.01	1.0 - 1.26	>10'000	1.12 - >10'000	1.0	1.0 - 1.06	328.27	1.01 - >10'000	>10'000	1.21 - >10'000	>10'000	1.0 - >10'000	1.78	1.01 - >10'000	1.52	1.0 - >10'000	>10'000	1.91 - >10'000	1.09	1.0 - >10'000	>10'000	1.47 - >10'000
		Sasol	Contribution to intensity (°C)	0.0016 °C	0.0001 °C - 0.0033 °C	0.0015 °C	-0.0003 °C - 0.0031 °C	0.0026 °C	0.0015 °C - 0.0035 °C	0.0018 °C	0.0011 °C - 0.0025 °C	0.0015 °C	0.0006 °C - 0.0026 °C	0.0022 °C	0.0014 °C - 0.003 °C	0.0023 °C	0.0012 °C - 0.0033 °C	0.0019 °C	0.0013 °C - 0.0024 °C	0.0023 °C	0.0017 °C - 0.0031 °C	0.002 °C	0.0011 °C - 0.0028 °C	0.0021 °C	0.0011 °C - 0.0029 °C	0.0025 °C	0.0012 °C - 0.0035 °C	0.0024 °C	0.0016 °C - 0.0032 °C	0.0024 °C	0.001 °C - 0.0032 °C	0.0024 °C	0.0011 °C - 0.0035 °C	0.0032 °C	0.0022 °C - 0.0044 °C	0.0033 °C	0.0021 °C - 0.0043 °C	0.0034 °C	0.001 °C - 0.0055 °C	0.003 °C	0.0019 °C - 0.0042 °C	0.0036 °C	0.002 °C - 0.0055 °C	0.0031 °C	0.0021 °C - 0.0042 °C	0.0021 °C	0.0007 °C - 0.0034 °C	0.0038 °C	0.0023 °C - 0.0054 °C
			Multiplication of preindustrial probability (-)	1.05	1.0 - >10'000	1.01	1.0 - 1.68	>10'000	6655.27 - >10'000	1.11	1.01 - >10'000	17.66	1.0 - >10'000	1.09	1.01 - >10'000	>10'000	1.05 - >10'000	1.1	1.01 - >10'000	12.79	1.03 - >10'000	1.01	1.0 - 1.03	1.0	1.0 - 1.0	>10'000	1.02 - >10'000	1.02	1.0 - 2.06	>10'000	1.38 - >10'000	1.01	1.0 - 1.18	947.39	1.03 - >10'000	>10'000	1.61 - >10'000	>10'000	1.01 - >10'000	3.12	1.02 - >10'000	2.29	1.01 - >10'000	>10'000	3.13 - >10'000	1.21	1.01 - >10'000	>10'000	1.99 - >10'000
		Seriti Resources	Contribution to intensity (°C)	0.0 °C	0.0 °C - 0.0 °C	0.0 °C	0.0 °C - 0.0 °C	0.0 °C	0.0 °C - 0.0 °C	0.0 °C	0.0 °C - 0.0 °C	0.0 °C	0.0 °C - 0.0 °C	0.0 °C	0.0 °C - 0.0 °C	0.0 °C	0.0 °C - 0.0 °C	0.0 °C	0.0 °C - 0.0 °C	0.0 °C	0.0 °C - 0.0 °C	0.0 °C	0.0 °C - 0.0 °C	0.0 °C	0.0 °C - 0.0 °C	0.0 °C	0.0 °C - 0.0 °C	0.0 °C	0.0 °C - 0.0 °C	0.0 °C	0.0 °C - 0.0 °C	0.0 °C	0.0 °C - 0.0 °C	0.0 °C	0.0 °C - 0.0 °C	0.0 °C	0.0 °C - 0.0 °C	0.0 °C	0.0 °C - 0.0 °C	0.0 °C	0.0 °C - 0.0 °C	0.0 °C	0.0 °C - 0.0 °C	0.0 °C	0.0 °C - 0.0 °C	0.0 °C	0.0 °C - 0.0 °C	0.0002 °C	0.0001 °C - 0.0002 °C
			Multiplication of preindustrial probability (-)	1.0	1.0 - 1.0	1.0	1.0 - 1.0	>10'000	5.94 - >10'000	1.0	1.0 - 1.0	1.0	1.0 - 1.0	1.0	1.0 - 1.0	1.0	1.0 - 1.0	1.0	1.0 - 1.0	1.0	1.0 - 1.0	1.0	1.0 - 1.0	1.0	1.0 - 1.0	1.0	1.0 - 1.0	1.0	1.0 - 1.0	1.0	1.0 - 1.0	1.0	1.0 - 1.0	1.0	1.0 - 1.0	1.0	1.0 - 1.0	1.0	1.0 - 1.0	1.0	1.0 - 1.0	1.0	1.0 - >10'000	>10'000	1.01 - >10'000	1.0	1.0 - >10'000	>10'000	1.04 - >10'000
[truncated: 328 more columns]
